# Supplementary material
Source: PubMed Central journal article supplement (PMC5108406)

**Supplementary Table 1: Genotype frequency for each of the 19 SNPs having a combined  $P$ -value  $<5.0 \times 10^{-7}$  in combined GWAS (with evidence of an association at  $P < 0.05$  in both German and UK datasets).**

| SNP              | Chr      | Position        | Risk Allele | Meta P-value    | UK P-value      | German P-value  | UK AAcase  | UK ABcase  | UK BBcase  | UK AAcon    | UK ABcon    | UK BBcon    | German AAcase | German ABcase | German BBcase | German AAcon | German ABcon | German BBcon |
|------------------|----------|-----------------|-------------|-----------------|-----------------|-----------------|------------|------------|------------|-------------|-------------|-------------|---------------|---------------|---------------|--------------|--------------|--------------|
| <b>rs4487645</b> | <b>7</b> | <b>21904765</b> | <b>C</b>    | <b>2.96E-13</b> | <b>1.07E-09</b> | <b>2.66E-05</b> | <b>669</b> | <b>548</b> | <b>103</b> | <b>2216</b> | <b>2333</b> | <b>646</b>  | <b>206</b>    | <b>126</b>    | <b>22</b>     | <b>320</b>   | <b>300</b>   | <b>83</b>    |
| rs7971           | 7        | 21907485        | A           | 4.04E-13        | 1.32E-10        | 7.06E-04        | 636        | 561        | 115        | 2072        | 2411        | 711         | 188           | 139           | 26            | 304          | 314          | 85           |
| rs4636103        | 7        | 21904513        | G           | 3.30E-12        | 2.55E-09        | 2.34E-04        | 553        | 609        | 159        | 1795        | 2486        | 913         | 169           | 143           | 42            | 262          | 310          | 131          |
| rs1128226        | 7        | 21908194        | A           | 9.32E-12        | 4.64E-09        | 3.72E-04        | 632        | 529        | 148        | 1996        | 2478        | 719         | 163           | 161           | 30            | 258          | 337          | 105          |
| rs12234262       | 7        | 21915828        | A           | 1.79E-10        | 3.10E-07        | 3.91E-05        | 574        | 573        | 173        | 1847        | 2509        | 838         | 156           | 158           | 40            | 227          | 348          | 128          |
| rs12537531       | 7        | 21898569        | A           | 2.60E-09        | 5.65E-07        | 8.59E-04        | 301        | 639        | 381        | 879         | 2564        | 1754        | 83            | 171           | 100           | 122          | 315          | 266          |
| rs35469450       | 7        | 21905907        | G           | 4.69E-08        | 7.55E-05        | 8.36E-06        | 141        | 576        | 603        | 411         | 2148        | 2637        | 47            | 147           | 160           | 36           | 268          | 385          |
| <b>rs1052501</b> | <b>3</b> | <b>41900402</b> | <b>G</b>    | <b>5.62E-08</b> | <b>8.65E-07</b> | <b>2.15E-02</b> | <b>54</b>  | <b>422</b> | <b>845</b> | <b>137</b>  | <b>1391</b> | <b>3668</b> | <b>10</b>     | <b>118</b>    | <b>226</b>    | <b>17</b>    | <b>185</b>   | <b>502</b>   |
| rs2128835        | 3        | 41837877        | G           | 5.79E-08        | 9.84E-07        | 1.92E-02        | 53         | 422        | 846        | 136         | 1384        | 3664        | 10            | 118           | 226           | 17           | 184          | 503          |
| rs6461614        | 7        | 21895052        | G           | 6.83E-08        | 5.18E-06        | 2.86E-03        | 461        | 640        | 218        | 1521        | 2580        | 1079        | 148           | 150           | 55            | 223          | 345          | 135          |
| rs2272007        | 3        | 41971140        | A           | 7.93E-08        | 1.20E-06        | 2.20E-02        | 53         | 423        | 844        | 139         | 1388        | 3664        | 10            | 117           | 226           | 17           | 184          | 503          |
| rs6599175        | 3        | 41761013        | G           | 8.85E-08        | 2.91E-06        | 8.31E-03        | 56         | 420        | 845        | 143         | 1405        | 3648        | 11            | 118           | 225           | 15           | 185          | 504          |
| rs1994157        | 3        | 41872486        | A           | 1.14E-07        | 1.43E-06        | 2.72E-02        | 52         | 420        | 848        | 133         | 1388        | 3677        | 10            | 116           | 228           | 17           | 183          | 503          |
| rs1125203        | 3        | 41735899        | G           | 1.27E-07        | 3.14E-06        | 1.19E-02        | 56         | 420        | 845        | 143         | 1406        | 3646        | 11            | 117           | 226           | 15           | 186          | 503          |
| rs17215589       | 3        | 41806207        | A           | 1.39E-07        | 1.01E-06        | 4.88E-02        | 47         | 388        | 886        | 110         | 1275        | 3809        | 9             | 105           | 239           | 15           | 169          | 519          |
| rs2390595        | 7        | 21881989        | A           | 2.02E-07        | 5.52E-06        | 1.11E-02        | 238        | 655        | 427        | 734         | 2474        | 1975        | 75            | 168           | 111           | 118          | 312          | 273          |
| rs3774372        | 3        | 41852418        | G           | 2.57E-07        | 1.06E-06        | 8.59E-02        | 54         | 419        | 847        | 139         | 1380        | 3677        | 10            | 115           | 229           | 19           | 181          | 481          |
| <b>rs6746082</b> | <b>2</b> | <b>25512748</b> | <b>A</b>    | <b>2.99E-07</b> | <b>4.17E-05</b> | <b>8.21E-04</b> | <b>889</b> | <b>392</b> | <b>40</b>  | <b>3202</b> | <b>1758</b> | <b>238</b>  | <b>247</b>    | <b>97</b>     | <b>10</b>     | <b>415</b>   | <b>258</b>   | <b>31</b>    |
| rs7577599        | 2        | 25613146        | A           | 3.37E-07        | 4.74E-05        | 7.94E-04        | 954        | 332        | 35         | 3430        | 1596        | 169         | 262           | 86            | 6             | 451          | 228          | 25           |

**Supplementary Table 2: Details of transcription factor binding sites (TFBSs) as predicted by Transfac Matrix Database and PReMod (using binding profiles from the JASPAR2 database).** "Score" refers to the confidence value assigned to each predicted binding region by the three different programs. For comparison, the observed and imputed SNPs and associated SNP-Test *P*-values are shown. The genotyped SNP with the most significant association is highlighted in yellow; imputed SNPs showing a more significant association are highlighted in red.

### 7p15.3 (rs4487645)

| Gene region      | rsID       | SNP type  | <i>P</i> -value | TF type   | Source   | Score | Chrom start | Chrom end |
|------------------|------------|-----------|-----------------|-----------|----------|-------|-------------|-----------|
|                  | rs10950880 | Genotyped | 0.657           |           |          |       | 21866713    |           |
|                  | rs6461611  | Imputed   | 0.446           |           |          |       | 21866786    |           |
|                  | rs6461612  | Imputed   | 0.446           |           |          |       | 21866791    |           |
|                  | rs4722066  | Genotyped | 4.00E-02        |           |          |       | 21867449    |           |
|                  | rs35161061 | Imputed   | 0.181           |           |          |       | 21867532    |           |
| DNAH11_Exon_70   |            |           |                 |           |          |       | 21867996    | 21868166  |
|                  | rs4722067  | Genotyped | 9.83E-02        |           |          |       | 21868091    |           |
|                  |            |           |                 | AREB6     | TransFac | 2.08  | 21868118    | 21868127  |
| DNAH11_Intron_70 |            |           |                 |           |          |       | 21868167    | 21870677  |
|                  | rs10226082 | Imputed   | 0.106           |           |          |       | 21868760    |           |
|                  | rs13309092 | Imputed   | 0.106           |           |          |       | 21869223    |           |
|                  | rs12154430 | Imputed   | 0.455           |           |          |       | 21870169    |           |
|                  | rs6959457  | Imputed   | 0.183           |           |          |       | 21870353    |           |
|                  |            |           |                 | POU2F1    | TransFac | 2.27  | 21870504    | 21870518  |
| DNAH11_Exon_71   |            |           |                 |           |          |       | 21870678    | 21870800  |
|                  |            |           |                 | LCR-F1    | TransFac | 3.48  | 21870769    | 21870791  |
| DNAH11_Intron_71 |            |           |                 |           |          |       | 21870801    | 21872612  |
|                  | rs12700315 | Imputed   | 0.474           |           |          |       | 21872157    |           |
|                  | rs12700316 | Imputed   | 0.182           |           |          |       | 21872256    |           |
|                  | rs12700317 | Imputed   | 7.56E-02        |           |          |       | 21872502    |           |
| DNAH11_Exon_72   |            |           |                 |           |          |       | 21872613    | 21872806  |
|                  |            |           |                 | LCR-F1    | TransFac | 2.54  | 21872781    | 21872794  |
| DNAH11_Intron_72 |            |           |                 |           |          |       | 21872807    | 21874001  |
|                  | rs17145743 | Imputed   | 0.212           |           |          |       | 21873109    |           |
|                  | rs10485986 | Imputed   | 5.50E-09        |           |          |       | 21873202    |           |
|                  |            |           |                 | ARP-1     | TransFac | 2.26  | 21873304    | 21873320  |
|                  |            |           |                 | E2F       | TransFac | 2.77  | 21873637    | 21873652  |
|                  |            |           |                 | mod102940 | PreMod   | 11    | 21873643    | 21874472  |
|                  |            |           |                 | Nkx3-1    | TransFac | 2.26  | 21873677    | 21873689  |
|                  | rs2074329  | Imputed   | 2.11E-02        |           |          |       | 21873900    |           |
|                  | rs4995598  | Imputed   | 0.468           |           |          |       | 21873983    |           |
| DNAH11_Exon_73   |            |           |                 |           |          |       | 21874002    | 21874150  |
| DNAH11_Intron_73 |            |           |                 |           |          |       | 21874151    | 21875006  |
|                  | rs11773744 | Imputed   | 7.06E-02        |           |          |       | 21874221    |           |
|                  |            |           |                 | Cart-1    | TransFac | 4.41  | 21874453    | 21874471  |
|                  | rs757132   | Imputed   | 0.745           |           |          |       | 21874516    |           |
|                  |            |           |                 | CUTL1     | TransFac | 2.3   | 21874741    | 21874751  |
|                  |            |           |                 | Pbx1a     | TransFac | 2.81  | 21874741    | 21874756  |
|                  |            |           |                 | POU3F2    | TransFac | 2.74  | 21874768    | 21874778  |
|                  |            |           |                 | E47       | TransFac | 3.05  | 21874941    | 21874957  |
|                  | rs67401326 | Imputed   | 0.150           |           |          |       | 21874970    |           |
| DNAH11_Exon_74   |            |           |                 |           |          |       | 21875007    | 21875134  |
| DNAH11_Intron_74 |            |           |                 |           |          |       | 21875135    | 21879416  |
|                  | rs10485987 | Genotyped | 0.424           |           |          |       | 21875489    |           |
|                  | rs886313   | Imputed   | 3.78E-08        |           |          |       | 21875606    |           |
|                  | rs12539597 | Genotyped | 0.572           |           |          |       | 21876392    |           |
|                  | rs17145802 | Imputed   | 0.125           |           |          |       | 21876633    |           |

|                  |            |           |          |           |          |      |  |          |          |
|------------------|------------|-----------|----------|-----------|----------|------|--|----------|----------|
|                  | rs11766053 | Imputed   | 3.25E-09 |           |          |      |  | 21877097 |          |
|                  | rs11976832 | Imputed   | 0.121    |           |          |      |  | 21877456 |          |
|                  | rs17145807 | Imputed   | 0.119    |           |          |      |  | 21877857 |          |
|                  | rs11767041 | Imputed   | 0.584    |           |          |      |  | 21878181 |          |
|                  | rs73279872 | Imputed   | 0.117    |           |          |      |  | 21878348 |          |
|                  | rs10254159 | Genotyped | 0.302    |           |          |      |  | 21878675 |          |
|                  | rs10254192 | Imputed   | 8.97E-02 |           |          |      |  | 21878729 |          |
|                  | rs11761264 | Imputed   | 9.61E-10 |           |          |      |  | 21879001 |          |
|                  |            |           |          | HSF1      | TransFac | 2.34 |  | 21879414 | 21879424 |
| DNAH11_Exon_75   |            |           |          |           |          |      |  | 21879417 | 21879644 |
|                  |            |           |          | LUN-1     | TransFac | 2.22 |  | 21879429 | 21879446 |
|                  |            |           |          | Nkx6-1    | TransFac | 2.1  |  | 21879567 | 21879580 |
| DNAH11_Intron_75 |            |           |          |           |          |      |  | 21879645 | 21886844 |
|                  | rs17361667 | Imputed   | 1.90E-11 |           |          |      |  | 21881515 |          |
|                  | rs17361723 | Imputed   | 2.55E-06 |           |          |      |  | 21881967 |          |
|                  | rs2390595  | Genotyped | 1.91E-07 |           |          |      |  | 21881989 |          |
|                  | rs2893060  | Imputed   | 1.21E-02 |           |          |      |  | 21882130 |          |
|                  | rs35107743 | Imputed   | 2.16E-06 |           |          |      |  | 21882218 |          |
|                  | rs6964220  | Imputed   | 2.84E-05 |           |          |      |  | 21883741 |          |
|                  | rs13308113 | Imputed   | 2.66E-07 |           |          |      |  | 21883885 |          |
|                  |            |           |          | RSRFC4    | TransFac | 2.63 |  | 21884747 | 21884763 |
|                  | rs10261104 | Genotyped | 9.58E-03 |           |          |      |  | 21885670 |          |
|                  | rs73077549 | Imputed   | 4.19E-02 |           |          |      |  | 21885720 |          |
|                  | rs6979604  | Imputed   | 1.14E-06 |           |          |      |  | 21886252 |          |
|                  | rs11763022 | Imputed   | 1.16E-11 |           |          |      |  | 21886571 |          |
|                  | rs11763025 | Imputed   | 2.87E-11 |           |          |      |  | 21886690 |          |
| DNAH11_Exon_76   |            |           |          |           |          |      |  | 21886845 | 21887036 |
| DNAH11_Intron_76 |            |           |          |           |          |      |  | 21887037 | 21890433 |
|                  | rs62445884 | Imputed   | 1.07E-06 |           |          |      |  | 21887081 |          |
|                  |            |           |          | FOXC1     | TransFac | 2.65 |  | 21887173 | 21887189 |
|                  |            |           |          | mod102941 | PreMod   | 15   |  | 21887287 | 21887746 |
|                  |            |           |          | POU3F2    | TransFac | 2.65 |  | 21887292 | 21887302 |
|                  |            |           |          | Cdc5      | TransFac | 1.99 |  | 21887292 | 21887304 |
|                  |            |           |          | FOXO4     | TransFac | 2.04 |  | 21887293 | 21887307 |
|                  |            |           |          | FOXO4     | TransFac | 2.52 |  | 21887307 | 21887321 |
|                  |            |           |          | POU2F1    | TransFac | 1.96 |  | 21887345 | 21887358 |
|                  |            |           |          | POU2F1    | TransFac | 2.12 |  | 21887351 | 21887374 |
|                  | rs10269223 | Imputed   | 9.82E-03 |           |          |      |  | 21887379 |          |
|                  |            |           |          | POU2F1    | TransFac | 2.32 |  | 21887489 | 21887503 |
|                  |            |           |          | POU3F2    | TransFac | 2.49 |  | 21887503 | 21887519 |
|                  | rs7350056  | Genotyped | 1.11E-05 |           |          |      |  | 21889080 |          |
|                  | rs7349999  | Genotyped | 7.23E-06 |           |          |      |  | 21889091 |          |
|                  |            |           |          | POU2F1    | TransFac | 2.08 |  | 21889257 | 21889280 |
|                  |            |           |          | Meis-1    | TransFac | 2.03 |  | 21889329 | 21889341 |
|                  |            |           |          | POU2F1    | TransFac | 3.36 |  | 21889450 | 21889464 |
|                  |            |           |          | AP-1      | TransFac | 2.11 |  | 21889869 | 21889880 |
|                  | rs57437438 | Imputed   | 3.44E-07 |           |          |      |  | 21889897 |          |
|                  | rs34824239 | Imputed   | 3.74E-03 |           |          |      |  | 21889909 |          |
|                  | rs4439007  | Imputed   | 3.27E-07 |           |          |      |  | 21890392 |          |
| DNAH11_Exon_77   |            |           |          |           |          |      |  | 21890434 | 21890553 |
|                  |            |           |          | Pax-2     | TransFac | 2.07 |  | 21890483 | 21890502 |
|                  | rs6461613  | Imputed   | 0.252    |           |          |      |  | 21890539 |          |
| DNAH11_Intron_77 |            |           |          |           |          |      |  | 21890554 | 21898567 |
|                  | rs6963989  | Imputed   | 1.36E-06 |           |          |      |  | 21890764 |          |
|                  | rs6978105  | Imputed   | 0.415    |           |          |      |  | 21891313 |          |
|                  | rs74445951 | Imputed   | 0.416    |           |          |      |  | 21891332 |          |
|                  | rs6978557  | Imputed   | 0.424    |           |          |      |  | 21891482 |          |
|                  | rs11769521 | Imputed   | 7.70E-12 |           |          |      |  | 21891630 |          |
|                  | rs11770434 | Imputed   | 5.74E-07 |           |          |      |  | 21892381 |          |
|                  | rs11763709 | Imputed   | 2.92E-11 |           |          |      |  | 21892503 |          |
|                  | rs11763665 | Imputed   | 2.92E-11 |           |          |      |  | 21892511 |          |
|                  |            |           |          | FOXF2     | TransFac | 2.41 |  | 21892721 | 21892737 |
|                  | rs35900877 | Imputed   | 0.465    |           |          |      |  | 21892758 |          |
|                  |            |           |          | FOXO4     | TransFac | 1.96 |  | 21893125 | 21893139 |

|                  |                   |                  |                 |        |          |                 |          |
|------------------|-------------------|------------------|-----------------|--------|----------|-----------------|----------|
|                  | rs12154628        | Imputed          | 1.79E-06        |        |          | 21893175        |          |
|                  | rs62445889        | Imputed          | 6.92E-02        |        |          | 21893287        |          |
|                  | rs7785157         | Imputed          | 2.25E-12        |        |          | 21893607        |          |
|                  | rs62445890        | Imputed          | 0.833           |        |          | 21894076        |          |
|                  | rs62445891        | Imputed          | 6.17E-02        |        |          | 21894181        |          |
|                  | rs117819282       | Imputed          | 0.844           |        |          | 21894423        |          |
|                  | rs57104699        | Imputed          | 2.29E-12        |        |          | 21894604        |          |
|                  | rs12534688        | Imputed          | 2.86E-02        |        |          | 21894841        |          |
|                  | rs6461614         | Genotyped        | 6.35E-08        |        |          | 21895052        |          |
|                  | rs34894075        | Imputed          | 1.04E-06        |        |          | 21895097        |          |
|                  | rs114887210       | Imputed          | 0.833           |        |          | 21895382        |          |
|                  | rs7778522         | Imputed          | 5.06E-02        |        |          | 21895789        |          |
|                  | rs6948632         | Imputed          | 2.29E-12        |        |          | 21895977        |          |
|                  | rs4392794         | Genotyped        | 9.11E-03        |        |          | 21896100        |          |
|                  | rs62445892        | Imputed          | 4.83E-02        |        |          | 21896196        |          |
|                  | rs6949101         | Genotyped        | 7.74E-07        |        |          | 21896281        |          |
|                  | rs60626359        | Imputed          | 1.75E-02        |        |          | 21896429        |          |
|                  | rs112075312       | Imputed          | 5.28E-02        |        |          | 21896753        |          |
|                  | rs55654636        | Imputed          | 0.402           |        |          | 21897096        |          |
|                  | rs62445896        | Imputed          | 1.73E-02        |        |          | 21897220        |          |
|                  | rs35907340        | Imputed          | 9.69E-07        |        |          | 21897787        |          |
|                  | rs12700323        | Imputed          | 9.63E-07        |        |          | 21898111        |          |
| DNAH11_Exon_78   |                   |                  |                 |        |          | 21898568        | 21898810 |
|                  | rs12537531        | Genotyped        | 2.34E-09        |        |          | 21898569        |          |
| DNAH11_Intron_78 |                   |                  |                 |        |          | 21898811        | 21900765 |
|                  | rs9639401         | Genotyped        | 2.61E-02        |        |          | 21898842        |          |
|                  | rs9639402         | Imputed          | 1.09E-02        |        |          | 21899073        |          |
|                  | rs12533084        | Imputed          | 1.52E-02        |        |          | 21899401        |          |
|                  | rs12533111        | Imputed          | 2.25E-10        |        |          | 21899498        |          |
|                  | rs9639403         | Imputed          | 0.237           |        |          | 21900008        |          |
|                  | rs9638793         | Imputed          | 0.792           |        |          | 21900349        |          |
|                  | rs4624929         | Imputed          | 1.82E-10        |        |          | 21900449        |          |
|                  | rs4484586         | Imputed          | 1.48E-02        |        |          | 21900470        |          |
| DNAH11_Exon_79   |                   |                  |                 |        |          | 21900766        | 21900948 |
|                  |                   |                  |                 | POU2F1 | TransFac | 2.66            |          |
|                  |                   |                  |                 |        |          | 21900820        | 21900843 |
| DNAH11_Intron_79 |                   |                  |                 |        |          | 21900949        | 21901026 |
| DNAH11_Exon_80   |                   |                  |                 |        |          | 21901027        | 21901142 |
| DNAH11_Intron_80 |                   |                  |                 |        |          | 21901143        | 21905478 |
|                  | rs62445897        | Imputed          | 1.47E-02        |        |          | 21901935        |          |
|                  | rs1139225         | Genotyped        | 0.390           |        |          | 21902511        |          |
|                  | rs1139224         | Imputed          | 0.421           |        |          | 21902569        |          |
|                  | <b>rs75341503</b> | <b>Imputed</b>   | <b>9.94E-14</b> |        |          | <b>21903223</b> |          |
|                  | rs7808371         | Imputed          | 0.747           |        |          | 21903382        |          |
|                  | rs12700324        | Imputed          | 1.12E-06        |        |          | 21903681        |          |
|                  | rs61114344        | Imputed          | 1.30E-02        |        |          | 21903920        |          |
|                  | rs117959121       | Imputed          | 0.802           |        |          | 21904298        |          |
|                  | rs4636103         | Genotyped        | 2.74E-12        |        |          | 21904513        |          |
|                  | <b>rs4487645</b>  | <b>Genotyped</b> | <b>2.21E-13</b> |        |          | <b>21904765</b> |          |
|                  | rs73683007        | Imputed          | 0.801           |        |          | 21904917        |          |
|                  | rs75439933        | Imputed          | 0.800           |        |          | 21905020        |          |
|                  | rs73683008        | Imputed          | 0.800           |        |          | 21905059        |          |
| DNAH11_Exon_81   |                   |                  |                 |        |          | 21905479        | 21905591 |
|                  | rs56333627        | Imputed          | 2.66E-11        |        |          | 21905557        |          |
| DNAH11_Intron_81 |                   |                  |                 |        |          | 21905592        | 21906122 |
|                  | <b>rs55714084</b> | <b>Imputed</b>   | <b>5.01E-14</b> |        |          | <b>21905614</b> |          |
|                  | rs72658829        | Imputed          | 4.49E-02        |        |          | 21905674        |          |
|                  | rs35469450        | Genotyped        | 3.88E-08        |        |          | 21905907        |          |
|                  | rs34245961        | Imputed          | 8.15E-07        |        |          | 21906010        |          |
| DNAH11_Exon_82   |                   |                  |                 |        |          | 21906123        | 21906263 |
| DNAH11_Intron_82 |                   |                  |                 |        |          | 21906264        | 21907149 |
|                  | rs62445899        | Imputed          | 4.70E-02        |        |          | 21906647        |          |
|                  | rs62445900        | Imputed          | 1.34E-02        |        |          | 21906990        |          |
|                  | rs56268505        | Imputed          | 5.83E-07        |        |          | 21907005        |          |
| CDCA7L_Exon_11   |                   |                  |                 |        |          | 21907042        | 21908495 |

|                  |            |           |          |        |          |      |          |          |
|------------------|------------|-----------|----------|--------|----------|------|----------|----------|
| DNAH11_Exon_83   |            |           |          |        |          |      | 21907150 | 21907982 |
|                  |            |           |          | LUN-1  | TransFac | 2.18 | 21907306 | 21907323 |
|                  | rs77448980 | Imputed   | 0.760    |        |          |      | 21907348 |          |
|                  | rs7971     | Genotyped | 3.29E-13 |        |          |      | 21907485 |          |
|                  | rs62445901 | Imputed   | 1.44E-02 |        |          |      | 21907586 |          |
|                  | rs12700325 | Imputed   | 5.49E-07 |        |          |      | 21907964 |          |
|                  | rs1128226  | Genotyped | 7.94E-12 |        |          |      | 21908194 |          |
| CDCA7L_Intron_10 |            |           |          |        |          |      | 21908496 | 21909120 |
| CDCA7L_Exon_10   |            |           |          |        |          |      | 21909121 | 21909257 |
|                  |            |           |          | POU2F1 | TransFac | 1.98 | 21909133 | 21909156 |
|                  |            |           |          | POU3F2 | TransFac | 2.3  | 21909140 | 21909150 |
|                  |            |           |          | E47    | TransFac | 2.22 | 21909220 | 21909236 |
|                  |            |           |          | ATF6   | TransFac | 2.02 | 21909231 | 21909239 |
| CDCA7L_Intron_9  |            |           |          |        |          |      | 21909258 | 21910252 |
|                  | rs34204775 | Imputed   | 9.02E-03 |        |          |      | 21910050 |          |
|                  | rs35898649 | Imputed   | 9.10E-03 |        |          |      | 21910247 |          |
| CDCA7L_Exon_9    |            |           |          |        |          |      | 21910253 | 21910402 |
|                  |            |           |          | c-Myc  | TransFac | 3.01 | 21910384 | 21910404 |
|                  |            |           |          | Arnt   | TransFac | 3.2  | 21910386 | 21910402 |
|                  |            |           |          | Max1   | TransFac | 2.67 | 21910387 | 21910401 |
| CDCA7L_Intron_8  |            |           |          |        |          |      | 21910402 | 21911648 |
|                  | rs4534048  | Imputed   | 8.20E-07 |        |          |      | 21910710 |          |
|                  | rs6976370  | Imputed   | 5.53E-07 |        |          |      | 21910764 |          |
|                  | rs56249828 | Imputed   | 1.10E-10 |        |          |      | 21911132 |          |
|                  |            |           |          | POU2F1 | TransFac | 3.1  | 21911221 | 21911235 |
|                  | rs4722069  | Imputed   | 0.515    |        |          |      | 21911302 |          |
|                  | rs6953368  | Imputed   | 7.98E-06 |        |          |      | 21911611 |          |
| CDCA7L_Exon_8    |            |           |          |        |          |      | 21911649 | 21911774 |
|                  |            |           |          | CUTL1  | TransFac | 2.48 | 21911671 | 21911686 |
| CDCA7L_Intron_7  |            |           |          |        |          |      | 21911775 | 21912431 |
|                  | rs12540021 | Imputed   | 9.07E-07 |        |          |      | 21912088 |          |
|                  | rs6461617  | Genotyped | 8.09E-05 |        |          |      | 21912212 |          |
|                  | rs4445125  | Genotyped | 1.30E-05 |        |          |      | 21912365 |          |
| CDCA7L_Exon_7    |            |           |          |        |          |      | 21912432 | 21912599 |
| CDCA7L_Intron_6  |            |           |          |        |          |      | 21912600 | 21912710 |
| CDCA7L_Exon_6    |            |           |          |        |          |      | 21912711 | 21912782 |
| CDCA7L_Intron_5  |            |           |          |        |          |      | 21912783 | 21914272 |
|                  |            |           |          | TBP    | TransFac | 2.66 | 21912997 | 21913012 |
|                  | rs28580520 | Imputed   | 7.09E-04 |        |          |      | 21913297 |          |
|                  | rs10238945 | Genotyped | 0.249    |        |          |      | 21913663 |          |
| CDCA7L_Exon_5    |            |           |          |        |          |      | 21914273 | 21914650 |
| CDCA7L_Intron_4  |            |           |          |        |          |      | 21914651 | 21917759 |
|                  | rs6973505  | Imputed   | 0.933    |        |          |      | 21914879 |          |
|                  | rs75703386 | Imputed   | 0.584    |        |          |      | 21914997 |          |
|                  | rs12234262 | Genotyped | 1.50E-10 |        |          |      | 21915828 |          |
|                  | rs7811959  | Imputed   | 0.178    |        |          |      | 21916383 |          |
|                  | rs7811690  | Imputed   | 5.01E-04 |        |          |      | 21916390 |          |
|                  | rs7811563  | Genotyped | 0.830    |        |          |      | 21916411 |          |
|                  | rs6980109  | Imputed   | 7.43E-03 |        |          |      | 21916663 |          |
|                  | rs34145161 | Imputed   | 0.196    |        |          |      | 21916797 |          |
|                  |            |           |          | Bach1  | TransFac | 2.58 | 21916941 | 21916956 |
|                  |            |           |          | AP-1   | TransFac | 2.06 | 21916942 | 21916955 |
|                  | rs4346898  | Genotyped | 6.38E-02 |        |          |      | 21917558 |          |
|                  | rs11978167 | Genotyped | 2.76E-02 |        |          |      | 21917630 |          |
| CDCA7L_Exon_4    |            |           |          |        |          |      | 21917760 | 21917897 |
| CDCA7L_Intron_3  |            |           |          |        |          |      | 21917861 | 21922896 |
|                  | rs4540316  | Imputed   | 0.191    |        |          |      | 21918412 |          |
|                  |            |           |          | SRF    | TransFac | 2.11 | 21919208 | 21919223 |
|                  | rs13242846 | Imputed   | 1.85E-02 |        |          |      | 21919239 |          |
|                  |            |           |          | CUTL1  | TransFac | 2.11 | 21919402 | 21919414 |
|                  |            |           |          | NCX    | TransFac | 3.53 | 21919404 | 21919414 |
|                  | rs6958427  | Genotyped | 0.647    |        |          |      | 21919479 |          |
|                  | rs59258063 | Imputed   | 0.124    |        |          |      | 21921098 |          |
|                  | rs6978094  | Imputed   | 7.88E-02 |        |          |      | 21921390 |          |

|                 |             |           |          |      |          |          |
|-----------------|-------------|-----------|----------|------|----------|----------|
|                 | rs6978729   | Imputed   | 0.441    |      | 21921683 |          |
|                 | rs13311158  | Imputed   | 4.88E-03 |      | 21921801 |          |
|                 | rs12700326  | Imputed   | 2.74E-02 |      | 21922263 |          |
|                 | rs12700327  | Genotyped | 9.50E-04 |      | 21922310 |          |
| CDCA7L_Exon_3   |             |           |          |      | 21922897 | 21923037 |
|                 | rs1128250   | Genotyped | 7.15E-02 |      | 21922930 |          |
| CDCA7L_Intron_2 |             |           |          |      | 21923038 | 21946404 |
|                 | rs55658106  | Imputed   | 9.07E-02 |      | 21923203 |          |
|                 | rs4398800   | Imputed   | 1.82E-03 |      | 21923596 |          |
|                 | rs10447610  | Imputed   | 9.49E-04 |      | 21923903 |          |
|                 | rs34433935  | Imputed   | 1.57E-03 |      | 21923962 |          |
|                 | rs4442026   | Imputed   | 6.55E-04 |      | 21924828 |          |
|                 | rs57033293  | Imputed   | 8.53E-02 |      | 21925502 |          |
|                 | rs62445924  | Imputed   | 8.62E-02 |      | 21925903 |          |
|                 | rs57082026  | Imputed   | 9.14E-02 |      | 21928172 |          |
|                 | rs4566940   | Imputed   | 1.13E-04 |      | 21929219 |          |
|                 | rs13234391  | Imputed   | 1.90E-03 |      | 21929430 |          |
|                 | rs62445926  | Imputed   | 9.45E-02 |      | 21929487 |          |
|                 | rs1406705   | Genotyped | 0.412    |      | 21930887 |          |
|                 | rs7798564   | Imputed   | 0.140    |      | 21931598 |          |
|                 | rs12700329  | Imputed   | 4.26E-02 |      | 21932121 |          |
|                 | rs12700330  | Imputed   | 4.27E-02 |      | 21932214 |          |
|                 | rs12673256  | Imputed   | 0.102    |      | 21932798 |          |
|                 | rs10950883  | Imputed   | 0.102    |      | 21932942 |          |
|                 | rs12539984  | Imputed   | 0.103    |      | 21933050 |          |
|                 | rs12532102  | Imputed   | 0.329    |      | 21933233 |          |
|                 | rs1581694   | Imputed   | 2.37E-02 |      | 21933504 |          |
|                 | rs71526380  | Imputed   | 2.33E-03 |      | 21934366 |          |
|                 | rs7777755   | Imputed   | 0.365    |      | 21934658 |          |
|                 | rs9655217   | Imputed   | 2.93E-02 |      | 21935650 |          |
|                 | rs7783537   | Imputed   | 0.283    |      | 21935850 |          |
|                 | rs7786788   | Imputed   | 2.58E-02 |      | 21935919 |          |
|                 | rs7787345   | Imputed   | 2.97E-02 |      | 21936030 |          |
|                 | rs62445928  | Imputed   | 0.110    |      | 21936185 |          |
|                 | rs62445929  | Imputed   | 0.372    |      | 21936193 |          |
|                 | rs7787698   | Imputed   | 4.98E-02 |      | 21936242 |          |
|                 | rs6959493   | Imputed   | 0.113    |      | 21937306 |          |
|                 | rs10279310  | Imputed   | 0.288    |      | 21937518 |          |
|                 | rs6959806   | Imputed   | 0.113    |      | 21937545 |          |
|                 | rs12154480  | Imputed   | 0.268    |      | 21937674 |          |
|                 | rs7793611   | Imputed   | 0.288    |      | 21937761 |          |
|                 | rs60570662  | Imputed   | 0.352    |      | 21937762 |          |
|                 | rs113334626 | Imputed   | 0.896    |      | 21939082 |          |
|                 | rs12055905  | Imputed   | 1.48E-02 |      | 21939408 |          |
|                 | rs12055908  | Imputed   | 0.119    |      | 21939519 |          |
|                 | rs60181879  | Imputed   | 8.10E-03 |      | 21939731 |          |
|                 | rs7807924   | Imputed   | 0.135    |      | 21940257 |          |
|                 | rs7791077   | Imputed   | 3.48E-02 |      | 21940337 |          |
|                 | rs4473920   | Imputed   | 0.425    |      | 21941135 |          |
|                 | rs1919906   | Imputed   | 0.131    |      | 21942082 |          |
|                 | rs9692388   | Imputed   | 0.311    |      | 21942526 |          |
|                 | rs9692398   | Imputed   | 4.20E-02 |      | 21942766 |          |
|                 | rs6461620   | Imputed   | 0.397    |      | 21942949 |          |
|                 | rs79106838  | Imputed   | 0.101    |      | 21943364 |          |
|                 | rs6963571   | Imputed   | 0.140    |      | 21943412 |          |
|                 | rs4487646   | Imputed   | 0.407    |      | 21943720 |          |
|                 | rs62445935  | Imputed   | 0.181    |      | 21944833 |          |
|                 | rs9638794   | Imputed   | 1.25E-02 |      | 21945268 |          |
|                 | rs7807075   | Genotyped | 4.59E-03 |      | 21945669 |          |
|                 | rs7790135   | Imputed   | 9.54E-03 |      | 21945710 |          |
| CDCA7L_Exon_2   |             |           |          |      | 21946405 | 21946458 |
| CDCA7L_Intron_1 |             |           |          |      | 21946459 | 21951923 |
|                 | rs6651057   | Imputed   | 3.61E-03 |      | 21947172 |          |
|                 |             |           |          | FAC1 | TransFac | 1.97     |
|                 |             |           |          |      | 21947293 | 21947307 |

|               |           |          |           |          |      |  |          |          |
|---------------|-----------|----------|-----------|----------|------|--|----------|----------|
| rs6946675     | Genotyped | 2.67E-02 |           |          |      |  | 21947298 |          |
| rs6461623     | Imputed   | 1.80E-02 |           |          |      |  | 21947409 |          |
| rs4394298     | Imputed   | 6.56E-02 |           |          |      |  | 21947616 |          |
|               |           |          | MZF-1     | TransFac | 2    |  | 21948172 | 21948180 |
| rs12700337    | Genotyped | 8.85E-02 |           |          |      |  | 21948463 |          |
| rs13226917    | Genotyped | 7.72E-02 |           |          |      |  | 21948825 |          |
| rs13242671    | Imputed   | 6.66E-02 |           |          |      |  | 21948932 |          |
| rs10262937    | Imputed   | 9.31E-03 |           |          |      |  | 21948973 |          |
| rs12669549    | Imputed   | 1.35E-02 |           |          |      |  | 21949784 |          |
| rs11766705    | Imputed   | 5.26E-03 |           |          |      |  | 21950303 |          |
|               |           |          | mod102942 | PreMod   | 13   |  | 21950876 | 21951007 |
| rs3823667     | Imputed   | 1.72E-02 |           |          |      |  | 21951863 |          |
| CDCA7L_Exon_1 |           |          |           |          |      |  | 21951924 | 21952067 |
|               |           |          | mod102943 | PreMod   | 11   |  | 21952249 | 21952537 |
|               |           |          | E2F       | TransFac | 2.54 |  | 21952310 | 21952318 |
|               |           |          | Sp1       | TransFac | 2.05 |  | 21952494 | 21952504 |
| rs12536673    | Imputed   | 5.64E-03 |           |          |      |  | 21953842 |          |
| rs1534770     | Imputed   | 2.48E-02 |           |          |      |  | 21954329 |          |
| rs1534771     | Genotyped | 7.78E-02 |           |          |      |  | 21954409 |          |

### 3p22.1 (rs1052501)

| Gene region  | rsID        | SNP type  | P-value   | TF type | Source | Score | Chrom start | Chrom end |
|--------------|-------------|-----------|-----------|---------|--------|-------|-------------|-----------|
|              | rs4973978   | Genotyped | 0.19745   |         |        |       | 41642549    |           |
|              | rs9824758   | Imputed   | 0.27027   |         |        |       | 41645142    |           |
|              | rs9824775   | Imputed   | 0.27867   |         |        |       | 41645175    |           |
|              | rs9880350   | Imputed   | 0.72736   |         |        |       | 41645198    |           |
|              | rs76990313  | Imputed   | 0.5106    |         |        |       | 41646583    |           |
|              | rs58191495  | Imputed   | 0.7943    |         |        |       | 41648038    |           |
|              | rs6783612   | Imputed   | 0.71033   |         |        |       | 41649598    |           |
|              | rs974595    | Genotyped | 0.024226  |         |        |       | 41651168    |           |
|              | rs974594    | Genotyped | 0.62424   |         |        |       | 41651366    |           |
|              | rs3856732   | Imputed   | 0.64583   |         |        |       | 41651510    |           |
|              | rs71331196  | Imputed   | 0.50325   |         |        |       | 41651554    |           |
|              | rs9873313   | Imputed   | 0.23124   |         |        |       | 41654051    |           |
|              | rs9818089   | Imputed   | 0.23114   |         |        |       | 41654156    |           |
|              | rs9877678   | Imputed   | 0.88804   |         |        |       | 41654449    |           |
|              | rs1436851   | Imputed   | 0.043684  |         |        |       | 41655754    |           |
|              | rs9828875   | Imputed   | 0.85076   |         |        |       | 41656237    |           |
|              | rs1961364   | Imputed   | 0.22683   |         |        |       | 41657282    |           |
|              | rs9861383   | Imputed   | 0.024457  |         |        |       | 41658556    |           |
|              | rs28879080  | Imputed   | 0.029562  |         |        |       | 41659397    |           |
|              | rs7622642   | Imputed   | 0.6308    |         |        |       | 41659802    |           |
|              | rs13061891  | Imputed   | 0.92504   |         |        |       | 41661524    |           |
|              | rs4973980   | Imputed   | 0.026752  |         |        |       | 41662682    |           |
|              | rs9860613   | Imputed   | 0.0025092 |         |        |       | 41664047    |           |
|              | rs6807898   | Imputed   | 0.20367   |         |        |       | 41664239    |           |
|              | rs9823858   | Imputed   | 0.80957   |         |        |       | 41664371    |           |
|              | rs4284955   | Imputed   | 0.18395   |         |        |       | 41664542    |           |
|              | rs17213434  | Imputed   | 0.51794   |         |        |       | 41665081    |           |
|              | rs9832843   | Imputed   | 0.035582  |         |        |       | 41665591    |           |
|              | rs34568869  | Imputed   | 0.52313   |         |        |       | 41667921    |           |
|              | rs4973981   | Imputed   | 0.95199   |         |        |       | 41668051    |           |
|              | rs9284876   | Imputed   | 0.60972   |         |        |       | 41668547    |           |
|              | rs9311286   | Imputed   | 0.02344   |         |        |       | 41668696    |           |
|              | rs34776729  | Imputed   | 0.52479   |         |        |       | 41668787    |           |
|              | rs17059957  | Imputed   | 0.52563   |         |        |       | 41668927    |           |
|              | rs6766940   | Imputed   | 0.61178   |         |        |       | 41669181    |           |
|              | rs114688025 | Imputed   | 0.034367  |         |        |       | 41675248    |           |
| ULK4_Exon_30 |             |           |           |         |        |       | 41680102    | 41680194  |

|                |                  |                |                 |           |          |      |                 |          |
|----------------|------------------|----------------|-----------------|-----------|----------|------|-----------------|----------|
| ULK4_Intron_29 |                  |                |                 |           |          |      | 41680195        | 41698002 |
|                | rs994439         | Genotyped      | 0.0045825       |           |          |      | 41691321        |          |
| ULK4_Exon_29   |                  |                |                 |           |          |      | 41698003        | 41698147 |
|                |                  |                |                 | TGIF      | TransFac | 2.37 | 41698039        | 41698050 |
| ULK4_Intron_28 |                  |                |                 |           |          |      | 41698148        | 41698247 |
| ULK4_Exon_28   |                  |                |                 |           |          |      | 41698248        | 41698299 |
| ULK4_Intron_27 |                  |                |                 |           |          |      | 41698300        | 41721552 |
|                |                  |                |                 | mod073650 | PreMod   | 10   | 41716375        | 41716497 |
|                |                  |                |                 | TBP       | TransFac | 2.14 | 41716443        | 41716451 |
| ULK4_Exon_27   |                  |                |                 |           |          |      | 41721553        | 41721647 |
|                |                  |                |                 | RORalpha1 | TransFac | 2.01 | 41721613        | 41721626 |
| ULK4_Intron_26 |                  |                |                 |           |          |      | 41721648        | 41721749 |
| ULK4_Exon_26   |                  |                |                 |           |          |      | 41721750        | 41721801 |
|                |                  |                |                 | Cdc5      | TransFac | 1.99 | 41721787        | 41721799 |
| ULK4_Intron_25 |                  |                |                 |           |          |      | 41721802        | 41731732 |
|                | rs6599167        | Imputed        | 5.27E-08        |           |          |      | 41725264        |          |
|                | rs6599168        | Imputed        | 5.26E-08        |           |          |      | 41725327        |          |
|                | rs6771928        | Imputed        | 5.31E-08        |           |          |      | 41725977        |          |
|                | rs6763508        | Imputed        | 5.32E-08        |           |          |      | 41725993        |          |
|                | rs6809328        | Imputed        | 5.29E-08        |           |          |      | 41726009        |          |
|                | rs6794074        | Imputed        | 5.27E-08        |           |          |      | 41726151        |          |
|                | rs6794211        | Imputed        | 5.32E-08        |           |          |      | 41726328        |          |
|                | rs6781529        | Imputed        | 5.33E-08        |           |          |      | 41726337        |          |
|                | rs73069356       | Imputed        | 1.20E-07        |           |          |      | 41727849        |          |
|                | rs73069357       | Imputed        | 1.18E-07        |           |          |      | 41728323        |          |
|                | rs9848754        | Imputed        | 5.47E-08        |           |          |      | 41728651        |          |
|                | rs4616614        | Imputed        | 5.46E-08        |           |          |      | 41728652        |          |
|                | rs4408846        | Imputed        | 5.46E-08        |           |          |      | 41728683        |          |
|                | rs1025646        | Imputed        | 5.54E-08        |           |          |      | 41729426        |          |
|                | rs6807015        | Imputed        | 5.54E-08        |           |          |      | 41729518        |          |
|                | <b>rs9847006</b> | <b>Imputed</b> | <b>3.15E-08</b> |           |          |      | <b>41730363</b> |          |
|                |                  |                |                 | HSF1      | TransFac | 2.41 | 41730821        | 41730831 |
|                | rs9869282        | Imputed        | 5.66E-08        |           |          |      | 41731068        |          |
|                |                  |                |                 | RORalpha1 | TransFac | 2.79 | 41731597        | 41731610 |
| ULK4_Exon_25   |                  |                |                 |           |          |      | 41731733        | 41731789 |
|                |                  |                |                 | ISGF-3    | TransFac | 2.38 | 41731747        | 41731762 |
|                |                  |                |                 | Meis-1    | TransFac | 1.98 | 41731761        | 41731773 |
| ULK4_Intron_24 |                  |                |                 |           |          |      | 41731790        | 41731942 |
| ULK4_Exon_24   |                  |                |                 |           |          |      | 41731943        | 41732064 |
|                | rs61744388       | Imputed        | 5.72E-08        |           |          |      | 41731969        |          |
|                | rs61744385       | Imputed        | 5.73E-08        |           |          |      | 41731990        |          |
| ULK4_Intron_23 |                  |                |                 |           |          |      | 41732065        | 41734223 |
|                | rs9866759        | Imputed        | 5.78E-08        |           |          |      | 41733422        |          |
|                | rs17060938       | Imputed        | 5.85E-08        |           |          |      | 41734195        |          |
|                |                  |                |                 | NCX       | TransFac | 2.28 | 41734215        | 41734225 |
| ULK4_Exon_23   |                  |                |                 |           |          |      | 41734224        | 41734357 |
|                |                  |                |                 | ZIC2      | TransFac | 2.02 | 41734315        | 41734324 |
| ULK4_Intron_22 |                  |                |                 |           |          |      | 41734358        | 41770856 |
|                |                  |                |                 | Max1      | TransFac | 2.12 | 41734429        | 41734443 |
|                | <b>rs9852303</b> | <b>Imputed</b> | <b>4.79E-08</b> |           |          |      | <b>41734529</b> |          |
|                | rs11923562       | Imputed        | 5.88E-08        |           |          |      | 41735335        |          |
|                | <b>rs3890604</b> | <b>Imputed</b> | <b>4.91E-08</b> |           |          |      | <b>41735629</b> |          |
|                | rs1125203        | Genotyped      | 1.14E-07        |           |          |      | 41735899        |          |
|                | rs2371623        | Imputed        | 5.92E-08        |           |          |      | 41736087        |          |
|                | <b>rs9825741</b> | <b>Imputed</b> | <b>5.01E-08</b> |           |          |      | <b>41736832</b> |          |
|                | rs9863915        | Imputed        | 5.92E-08        |           |          |      | 41737006        |          |
|                | rs9826058        | Imputed        | 5.89E-08        |           |          |      | 41737066        |          |
|                | rs9864217        | Imputed        | 5.92E-08        |           |          |      | 41737210        |          |
|                | rs9864331        | Imputed        | 5.92E-08        |           |          |      | 41737221        |          |
|                | rs9830469        | Imputed        | 5.93E-08        |           |          |      | 41737539        |          |
|                | rs5848608        | Imputed        | 1.35E-05        |           |          |      | 41737749        |          |
|                | rs55835726       | Imputed        | 5.95E-08        |           |          |      | 41738053        |          |
|                | rs9869440        | Imputed        | 5.96E-08        |           |          |      | 41738159        |          |
|                | rs17060961       | Imputed        | 6.04E-08        |           |          |      | 41738715        |          |



|                   |                |                 |        |          |                 |          |          |
|-------------------|----------------|-----------------|--------|----------|-----------------|----------|----------|
| rs9874975         | Imputed        | 5.41E-08        |        |          | 41739304        |          |          |
| rs7651190         | Imputed        | 6.23E-08        |        |          | 41740959        |          |          |
| rs9882329         | Imputed        | 6.24E-08        |        |          | 41742158        |          |          |
| rs6801343         | Imputed        | 6.24E-08        |        |          | 41742238        |          |          |
| rs73069380        | Imputed        | 0.00033538      |        |          | 41746181        |          |          |
| rs6599170         | Imputed        | 6.28E-08        |        |          | 41747722        |          |          |
| rs28755797        | Imputed        | 6.44E-08        |        |          | 41749450        |          |          |
| rs9854833         | Imputed        | 5.92E-08        |        |          | 41750581        |          |          |
| rs9875083         | Imputed        | 6.84E-08        |        |          | 41750790        |          |          |
| rs6789260         | Imputed        | 7.77E-08        |        |          | 41751354        |          |          |
| rs6781326         | Imputed        | 7.76E-08        |        |          | 41752032        |          |          |
| rs111335312       | Imputed        | 0.018688        |        |          | 41752747        |          |          |
|                   |                |                 | Nkx3-1 | TransFac | 2.11            | 41756527 | 41756539 |
|                   |                |                 | POU2F1 | TransFac | 2.83            | 41756787 | 41756801 |
|                   |                |                 | ATF-2  | TransFac | 2.28            | 41757091 | 41757103 |
|                   |                |                 | ATF-2  | TransFac | 2.24            | 41757093 | 41757101 |
| rs73069390        | Imputed        | 1.09E-07        |        |          | 41760517        |          |          |
| rs6599175         | Genotyped      | 7.87E-08        |        |          | 41761013        |          |          |
| rs9847975         | Imputed        | 8.08E-08        |        |          | 41761908        |          |          |
| rs73069392        | Imputed        | 8.07E-08        |        |          | 41762013        |          |          |
| rs73069394        | Imputed        | 8.00E-08        |        |          | 41762237        |          |          |
| rs73069396        | Imputed        | 8.00E-08        |        |          | 41762240        |          |          |
| rs6599176         | Imputed        | 7.73E-08        |        |          | 41763496        |          |          |
| rs12633534        | Imputed        | 0.10875         |        |          | 41764154        |          |          |
| rs17061431        | Imputed        | 6.89E-08        |        |          | 41767659        |          |          |
| rs9868066         | Imputed        | 6.62E-08        |        |          | 41769165        |          |          |
| rs7650227         | Imputed        | 6.49E-08        |        |          | 41769941        |          |          |
| rs9867627         | Imputed        | 7.73E-08        |        |          | 41770845        |          |          |
| ULK4_Exon_22      |                |                 |        |          | 41770857        | 41770984 |          |
| ULK4_Intron_21    |                |                 |        |          | 41770985        | 41806156 |          |
| rs73071304        | Imputed        | 8.22E-08        |        |          | 41772508        |          |          |
| rs57479675        | Imputed        | 5.98E-08        |        |          | 41773042        |          |          |
| rs73071307        | Imputed        | 8.00E-08        |        |          | 41773703        |          |          |
| rs7616123         | Imputed        | 7.96E-08        |        |          | 41773945        |          |          |
| rs76471037        | Imputed        | 5.80E-08        |        |          | 41774418        |          |          |
| rs71315508        | Imputed        | 0.030784        |        |          | 41777823        |          |          |
| rs79548696        | Imputed        | 5.25E-08        |        |          | 41778389        |          |          |
| rs9311288         | Imputed        | 5.10E-08        |        |          | 41779585        |          |          |
| rs55748698        | Imputed        | 6.92E-08        |        |          | 41780237        |          |          |
| <b>rs9854838</b>  | <b>Imputed</b> | <b>4.97E-08</b> |        |          | <b>41780674</b> |          |          |
| rs73071315        | Imputed        | 6.83E-08        |        |          | 41780891        |          |          |
| rs17280777        | Imputed        | 6.79E-08        |        |          | 41781171        |          |          |
| rs111304140       | Imputed        | 6.75E-08        |        |          | 41781496        |          |          |
| rs113874002       | Imputed        | 6.71E-08        |        |          | 41781718        |          |          |
| <b>rs9865127</b>  | <b>Imputed</b> | <b>4.77E-08</b> |        |          | <b>41782452</b> |          |          |
| <b>rs17214945</b> | <b>Imputed</b> | <b>2.83E-08</b> |        |          | <b>41783664</b> |          |          |
| rs59583650        | Imputed        | 6.40E-08        |        |          | 41784067        |          |          |
| rs57638657        | Imputed        | 7.04E-08        |        |          | 41784242        |          |          |
| rs111708447       | Imputed        | 6.32E-08        |        |          | 41784587        |          |          |
| rs73071325        | Imputed        | 6.28E-08        |        |          | 41784993        |          |          |
| rs73071328        | Imputed        | 6.27E-08        |        |          | 41785059        |          |          |
| rs73828254        | Imputed        | 6.26E-08        |        |          | 41785184        |          |          |
| rs13093299        | Genotyped      | 0.029097        |        |          | 41785224        |          |          |
| <b>rs17062109</b> | <b>Imputed</b> | <b>2.97E-08</b> |        |          | <b>41785368</b> |          |          |
| rs17214987        | Imputed        | 6.22E-08        |        |          | 41785485        |          |          |
| <b>rs73071329</b> | <b>Imputed</b> | <b>4.45E-08</b> |        |          | <b>41785543</b> |          |          |
| rs73071330        | Imputed        | 6.22E-08        |        |          | 41785557        |          |          |
| rs17280952        | Imputed        | 6.19E-08        |        |          | 41785838        |          |          |
| rs17280980        | Imputed        | 6.18E-08        |        |          | 41785953        |          |          |
| <b>rs9832037</b>  | <b>Imputed</b> | <b>4.35E-08</b> |        |          | <b>41787036</b> |          |          |
| rs55744136        | Imputed        | 7.00E-07        |        |          | 41787297        |          |          |
| rs59432762        | Imputed        | 7.00E-07        |        |          | 41787298        |          |          |
| <b>rs17215183</b> | <b>Imputed</b> | <b>2.87E-08</b> |        |          | <b>41787338</b> |          |          |
| rs60764195        | Imputed        | 6.06E-08        |        |          | 41787526        |          |          |

|                |           |           |        |          |     |  |          |          |
|----------------|-----------|-----------|--------|----------|-----|--|----------|----------|
| rs9837273      | Imputed   | 4.30E-08  |        |          |     |  | 41788108 |          |
| rs9817510      | Imputed   | 4.30E-08  |        |          |     |  | 41788112 |          |
| rs7631914      | Imputed   | 4.27E-08  |        |          |     |  | 41788561 |          |
| rs111325524    | Imputed   | 5.89E-08  |        |          |     |  | 41789568 |          |
| rs56205414     | Imputed   | 4.20E-08  |        |          |     |  | 41790206 |          |
| rs10452020     | Imputed   | 4.15E-08  |        |          |     |  | 41790955 |          |
| rs10452022     | Imputed   | 4.61E-07  |        |          |     |  | 41791046 |          |
| rs113722150    | Imputed   | 6.33E-08  |        |          |     |  | 41791545 |          |
| rs111877184    | Imputed   | 4.12E-08  |        |          |     |  | 41791677 |          |
| rs17281182     | Imputed   | 5.68E-08  |        |          |     |  | 41792267 |          |
| rs7631057      | Imputed   | 4.05E-08  |        |          |     |  | 41792955 |          |
| rs9857175      | Imputed   | 3.88E-08  |        |          |     |  | 41797058 |          |
| rs9875107      | Imputed   | 3.86E-08  |        |          |     |  | 41797317 |          |
| rs73071337     | Imputed   | 5.91E-08  |        |          |     |  | 41797522 |          |
| rs9842261      | Imputed   | 3.85E-08  |        |          |     |  | 41797712 |          |
| rs114034165    | Imputed   | 5.30E-08  |        |          |     |  | 41798301 |          |
| rs112071272    | Imputed   | 5.86E-08  |        |          |     |  | 41798367 |          |
| rs73071338     | Imputed   | 5.25E-08  |        |          |     |  | 41799332 |          |
| rs6803560      | Imputed   | 3.77E-08  |        |          |     |  | 41799484 |          |
| rs6803652      | Imputed   | 3.18E-08  |        |          |     |  | 41799560 |          |
| rs76966288     | Imputed   | 5.03E-08  |        |          |     |  | 41800059 |          |
| rs73071341     | Imputed   | 4.71E-08  |        |          |     |  | 41801215 |          |
| rs73071343     | Imputed   | 4.58E-08  |        |          |     |  | 41801881 |          |
| rs10212536     | Imputed   | 3.57E-08  |        |          |     |  | 41802030 |          |
| rs73071344     | Imputed   | 4.55E-08  |        |          |     |  | 41802066 |          |
| rs9311289      | Genotyped | 0.28889   |        |          |     |  | 41802067 |          |
| rs58442057     | Imputed   | 4.58E-08  |        |          |     |  | 41802213 |          |
| rs9840037      | Imputed   | 3.39E-08  |        |          |     |  | 41802526 |          |
| rs73071352     | Imputed   | 4.82E-08  |        |          |     |  | 41803304 |          |
| rs73071354     | Imputed   | 5.42E-08  |        |          |     |  | 41804190 |          |
| rs4973892      | Genotyped | 0.0040738 |        |          |     |  | 41804401 |          |
| rs73071356     | Imputed   | 6.12E-08  |        |          |     |  | 41804490 |          |
| rs17215498     | Imputed   | 6.72E-08  |        |          |     |  | 41804683 |          |
| rs9852020      | Imputed   | 4.78E-08  |        |          |     |  | 41805210 |          |
| rs73071358     | Imputed   | 7.15E-08  |        |          |     |  | 41805491 |          |
| ULK4_Exon_21   |           |           |        |          |     |  | 41806157 | 41806339 |
| rs17215589     | Genotyped | 1.28E-07  |        |          |     |  | 41806207 |          |
|                |           |           | POU2F1 | TransFac | 2.3 |  | 41806228 | 41806247 |
| ULK4_Intron_20 |           |           |        |          |     |  | 41806340 | 41816627 |
| rs10510729     | Imputed   | 7.36E-08  |        |          |     |  | 41807002 |          |
| rs17281609     | Imputed   | 7.36E-08  |        |          |     |  | 41808436 |          |
| rs9834098      | Imputed   | 5.01E-08  |        |          |     |  | 41808497 |          |
| rs73828280     | Imputed   | 7.35E-08  |        |          |     |  | 41808911 |          |
| rs73073323     | Imputed   | 7.35E-08  |        |          |     |  | 41809055 |          |
| rs73073326     | Imputed   | 7.35E-08  |        |          |     |  | 41809199 |          |
| rs12185908     | Imputed   | 8.29E-08  |        |          |     |  | 41809496 |          |
| rs12186076     | Imputed   | 5.01E-08  |        |          |     |  | 41809643 |          |
| rs73828283     | Imputed   | 7.36E-08  |        |          |     |  | 41810103 |          |
| rs112265441    | Imputed   | 7.36E-08  |        |          |     |  | 41811072 |          |
| rs4973893      | Imputed   | 0.41597   |        |          |     |  | 41811474 |          |
| rs12185934     | Imputed   | 7.35E-08  |        |          |     |  | 41811562 |          |
| rs12186050     | Imputed   | 7.35E-08  |        |          |     |  | 41811883 |          |
| rs12186051     | Imputed   | 7.35E-08  |        |          |     |  | 41811923 |          |
| rs12186109     | Imputed   | 7.35E-08  |        |          |     |  | 41811924 |          |
| rs73073337     | Imputed   | 7.35E-08  |        |          |     |  | 41812501 |          |
| rs766286       | Imputed   | 7.34E-08  |        |          |     |  | 41813333 |          |
| rs11129932     | Imputed   | 7.34E-08  |        |          |     |  | 41813771 |          |
| rs2371627      | Imputed   | 5.05E-08  |        |          |     |  | 41814223 |          |
| rs4621303      | Imputed   | 5.05E-08  |        |          |     |  | 41814374 |          |
| rs73073342     | Imputed   | 7.34E-08  |        |          |     |  | 41814459 |          |
| rs58360908     | Imputed   | 8.29E-08  |        |          |     |  | 41814841 |          |
| rs57809229     | Imputed   | 7.34E-08  |        |          |     |  | 41815166 |          |
| rs4973985      | Imputed   | 0.41607   |        |          |     |  | 41815526 |          |
| rs6776724      | Imputed   | 5.06E-08  |        |          |     |  | 41816274 |          |

|                |                  |                |                 |           |          |      |                 |          |
|----------------|------------------|----------------|-----------------|-----------|----------|------|-----------------|----------|
| ULK4_Exon_20   | rs4973986        | Genotyped      | 0.58966         |           |          |      | 41816628        | 41816789 |
|                |                  |                |                 | c-Myc     | TransFac | 2.12 | 41816720        |          |
|                |                  |                |                 |           |          |      | 41816762        | 41816774 |
| ULK4_Intron_19 |                  |                |                 |           |          |      | 41816790        | 41835918 |
|                | rs17215883       | Imputed        | 7.34E-08        |           |          |      | 41816877        |          |
|                | <b>rs6599178</b> | <b>Imputed</b> | <b>5.06E-08</b> |           |          |      | <b>41817133</b> |          |
|                | rs73073352       | Imputed        | 7.33E-08        |           |          |      | 41817188        |          |
|                | rs73073355       | Imputed        | 7.33E-08        |           |          |      | 41817336        |          |
|                | <b>rs7626217</b> | <b>Imputed</b> | <b>5.07E-08</b> |           |          |      | <b>41817419</b> |          |
|                | rs73073358       | Imputed        | 8.28E-08        |           |          |      | 41817531        |          |
|                | rs73073361       | Imputed        | 7.34E-08        |           |          |      | 41817930        |          |
|                | rs73073364       | Imputed        | 7.34E-08        |           |          |      | 41818062        |          |
|                | rs73073368       | Imputed        | 5.08E-08        |           |          |      | 41818395        |          |
|                | rs73073371       | Imputed        | 7.34E-08        |           |          |      | 41818447        |          |
|                | rs57525756       | Imputed        | 7.34E-08        |           |          |      | 41818595        |          |
|                | rs56194645       | Imputed        | 7.34E-08        |           |          |      | 41818597        |          |
|                | rs55788971       | Imputed        | 7.34E-08        |           |          |      | 41818969        |          |
|                | rs60927633       | Imputed        | 7.33E-08        |           |          |      | 41819014        |          |
|                | rs111520733      | Imputed        | 3.78E-06        |           |          |      | 41819616        |          |
|                | rs6793567        | Imputed        | 7.32E-08        |           |          |      | 41820551        |          |
|                | rs28801070       | Imputed        | 7.26E-07        |           |          |      | 41820558        |          |
|                | rs78863838       | Imputed        | 0.00017405      |           |          |      | 41820601        |          |
|                | rs112242054      | Imputed        | 0.0018365       |           |          |      | 41820647        |          |
|                | rs56183581       | Imputed        | 7.32E-08        |           |          |      | 41823496        |          |
|                | rs55682201       | Imputed        | 7.32E-08        |           |          |      | 41823501        |          |
|                | rs7647561        | Imputed        | 7.32E-08        |           |          |      | 41823631        |          |
|                | rs10510730       | Imputed        | 2.99E-06        |           |          |      | 41824017        |          |
|                | rs55916959       | Imputed        | 7.31E-08        |           |          |      | 41824134        |          |
|                | rs7648357        | Imputed        | 5.14E-08        |           |          |      | 41824674        |          |
|                | rs73077358       | Imputed        | 7.29E-08        |           |          |      | 41825009        |          |
|                | rs73077359       | Imputed        | 7.29E-08        |           |          |      | 41825020        |          |
|                | rs73077360       | Imputed        | 7.28E-08        |           |          |      | 41825058        |          |
|                | rs73077361       | Imputed        | 7.28E-08        |           |          |      | 41825150        |          |
|                | rs113683976      | Imputed        | 7.16E-07        |           |          |      | 41825689        |          |
|                | rs9869446        | Imputed        | 0.34364         |           |          |      | 41826214        |          |
|                | rs17215988       | Imputed        | 7.21E-08        |           |          |      | 41826324        |          |
|                | rs73077365       | Imputed        | 7.11E-08        |           |          |      | 41826563        |          |
|                | rs6796210        | Imputed        | 7.70E-08        |           |          |      | 41826722        |          |
|                | rs73077367       | Imputed        | 6.62E-08        |           |          |      | 41826963        |          |
|                | rs60943892       | Imputed        | 7.04E-08        |           |          |      | 41827311        |          |
|                | rs73077373       | Imputed        | 7.03E-08        |           |          |      | 41827891        |          |
|                | rs73077375       | Imputed        | 7.80E-08        |           |          |      | 41828062        |          |
|                | rs7646144        | Imputed        | 6.79E-08        |           |          |      | 41828129        |          |
|                | rs7632387        | Imputed        | 6.80E-08        |           |          |      | 41828165        |          |
|                | rs10510731       | Imputed        | 7.02E-08        |           |          |      | 41828314        |          |
|                | rs61283393       | Imputed        | 7.03E-08        |           |          |      | 41829139        |          |
|                | rs57209010       | Imputed        | 7.02E-08        |           |          |      | 41829747        |          |
|                | rs6599179        | Imputed        | 6.90E-08        |           |          |      | 41830288        |          |
|                | rs78916339       | Imputed        | 0.50053         |           |          |      | 41831065        |          |
|                | rs73077386       | Imputed        | 7.02E-08        |           |          |      | 41832656        |          |
|                | rs7648578        | Imputed        | 7.82E-08        |           |          |      | 41833735        |          |
|                | rs900569         | Genotyped      | 0.32953         |           |          |      | 41834977        |          |
|                | rs73077390       | Imputed        | 7.00E-08        |           |          |      | 41835259        |          |
|                | rs9856088        | Imputed        | 7.10E-08        |           |          |      | 41835486        |          |
|                | rs9855965        | Imputed        | 7.10E-08        |           |          |      | 41835512        |          |
|                | rs9818169        | Imputed        | 7.09E-08        |           |          |      | 41835603        |          |
|                |                  |                |                 | FOXD1     | TransFac | 2.71 | 41835668        | 41835684 |
|                |                  |                |                 | mod073651 | PreMod   | 12   | 41835836        | 41835968 |
|                |                  |                |                 | STAT3     | TransFac | 2.39 | 41835915        | 41835936 |
|                |                  |                |                 | NCX       | TransFac | 2.24 | 41835917        | 41835927 |
| ULK4_Exon_19   |                  |                |                 |           |          |      | 41835919        | 41836002 |
| ULK4_Intron_18 |                  |                |                 |           |          |      | 41836003        | 41852359 |
|                | rs17063584       | Imputed        | 7.09E-08        |           |          |      | 41836467        |          |
|                | rs17063599       | Imputed        | 7.10E-08        |           |          |      | 41836680        |          |

|             |           |            |          |
|-------------|-----------|------------|----------|
| rs12639255  | Imputed   | 7.10E-08   | 41836742 |
| rs6783001   | Imputed   | 7.14E-08   | 41837236 |
| rs6795797   | Imputed   | 7.14E-08   | 41837254 |
| rs73079307  | Imputed   | 6.84E-08   | 41837277 |
| rs1564716   | Imputed   | 7.14E-08   | 41837617 |
| rs2128834   | Imputed   | 6.23E-08   | 41837649 |
| rs2128835   | Genotyped | 5.22E-08   | 41837877 |
| rs17063649  | Imputed   | 7.14E-08   | 41838410 |
| rs28733681  | Imputed   | 7.14E-08   | 41838448 |
| rs17063653  | Imputed   | 7.14E-08   | 41838821 |
| rs73079316  | Imputed   | 7.14E-08   | 41838863 |
| rs73079321  | Imputed   | 7.14E-08   | 41838914 |
| rs74482513  | Imputed   | 7.14E-08   | 41839101 |
| rs112059754 | Imputed   | 7.14E-08   | 41839129 |
| rs111465678 | Imputed   | 6.81E-08   | 41839409 |
| rs73079324  | Imputed   | 7.15E-08   | 41839568 |
| rs73079325  | Imputed   | 7.15E-08   | 41839569 |
| rs73830511  | Imputed   | 7.15E-08   | 41839647 |
| rs73079327  | Imputed   | 7.15E-08   | 41839701 |
| rs6790732   | Imputed   | 7.15E-08   | 41839876 |
| rs6768128   | Imputed   | 7.15E-08   | 41840084 |
| rs6793520   | Imputed   | 7.15E-08   | 41840293 |
| rs6768438   | Imputed   | 7.16E-08   | 41840359 |
| rs6805880   | Imputed   | 7.15E-08   | 41840401 |
| rs6768542   | Imputed   | 7.15E-08   | 41840478 |
| rs73079334  | Imputed   | 6.80E-08   | 41840480 |
| rs6768563   | Imputed   | 7.15E-08   | 41840545 |
| rs116759255 | Imputed   | 7.15E-08   | 41840655 |
| rs7649989   | Imputed   | 7.15E-08   | 41840847 |
| rs7652541   | Imputed   | 7.58E-08   | 41841097 |
| rs59553563  | Imputed   | 7.15E-08   | 41841603 |
| rs59248949  | Imputed   | 7.15E-08   | 41841661 |
| rs59849553  | Imputed   | 7.15E-08   | 41841790 |
| rs56776628  | Imputed   | 7.15E-08   | 41841860 |
| rs12494132  | Imputed   | 0.0071496  | 41842033 |
| rs12636988  | Imputed   | 7.15E-08   | 41842450 |
| rs62258621  | Imputed   | 0.58183    | 41842478 |
| rs114173684 | Imputed   | 9.76E-08   | 41842603 |
| rs114603078 | Imputed   | 9.76E-08   | 41842604 |
| rs13079681  | Imputed   | 6.67E-07   | 41842625 |
| rs35475272  | Imputed   | 6.67E-07   | 41842647 |
| rs35238909  | Imputed   | 5.29E-06   | 41842740 |
| rs7432737   | Imputed   | 5.29E-06   | 41842863 |
| rs111821658 | Imputed   | 7.17E-08   | 41845470 |
| rs9790316   | Imputed   | 6.32E-07   | 41845747 |
| rs111634789 | Imputed   | 7.18E-08   | 41846360 |
| rs28642910  | Imputed   | 7.17E-08   | 41846395 |
| rs28581706  | Imputed   | 7.18E-08   | 41846401 |
| rs113416896 | Imputed   | 0.00018211 | 41846447 |
| rs28652776  | Imputed   | 5.27E-06   | 41846524 |
| rs9831404   | Imputed   | 7.17E-08   | 41846829 |
| rs77717550  | Imputed   | 7.17E-08   | 41847508 |
| rs73079340  | Imputed   | 0.58312    | 41847527 |
| rs9816560   | Imputed   | 7.18E-08   | 41847531 |
| rs9816772   | Imputed   | 7.18E-08   | 41847881 |
| rs113213296 | Imputed   | 9.71E-08   | 41848101 |
| rs111967505 | Imputed   | 6.71E-08   | 41848161 |
| rs6803198   | Imputed   | 7.18E-08   | 41848782 |
| rs7616844   | Imputed   | 7.18E-08   | 41849347 |
| rs6773101   | Imputed   | 0.0044756  | 41849793 |
| rs9810804   | Imputed   | 7.18E-08   | 41849934 |
| rs9848793   | Imputed   | 6.68E-08   | 41850003 |
| rs9848992   | Imputed   | 7.19E-08   | 41850301 |
| rs12634670  | Imputed   | 6.67E-08   | 41850303 |

|                |             |           |          |          |          |
|----------------|-------------|-----------|----------|----------|----------|
|                | rs9849393   | Imputed   | 7.18E-08 | 41850373 |          |
|                | rs9852991   | Imputed   | 7.18E-08 | 41850459 |          |
|                | rs73830516  | Imputed   | 6.67E-08 | 41851060 |          |
|                | rs73079350  | Imputed   | 7.53E-08 | 41851314 |          |
|                | rs967619    | Imputed   | 7.53E-08 | 41851714 |          |
| ULK4_Exon_18   |             |           |          | 41852360 | 41852467 |
|                | rs3774372   | Genotyped | 2.43E-07 | 41852418 |          |
| ULK4_Intron_17 |             |           |          | 41852468 | 41900369 |
|                | rs56104136  | Imputed   | 6.66E-08 | 41852857 |          |
|                | rs9869207   | Imputed   | 7.18E-08 | 41853665 |          |
|                | rs79817383  | Imputed   | 6.65E-08 | 41855770 |          |
|                | rs7624372   | Imputed   | 7.17E-08 | 41856111 |          |
|                | rs7622259   | Imputed   | 7.17E-08 | 41856355 |          |
|                | rs9830064   | Imputed   | 7.17E-08 | 41856805 |          |
|                | rs9810731   | Imputed   | 7.17E-08 | 41857105 |          |
|                | rs9810865   | Imputed   | 7.17E-08 | 41857151 |          |
|                | rs114960066 | Imputed   | 7.17E-08 | 41857327 |          |
|                | rs113341165 | Imputed   | 6.65E-08 | 41857720 |          |
|                | rs114714860 | Imputed   | 2.86E-06 | 41857909 |          |
|                | rs113449797 | Imputed   | 6.65E-08 | 41858023 |          |
|                | rs113471865 | Imputed   | 7.16E-08 | 41858105 |          |
|                | rs11714981  | Imputed   | 0.21159  | 41858406 |          |
|                | rs55941479  | Imputed   | 7.17E-08 | 41858505 |          |
|                | rs58940436  | Imputed   | 7.16E-08 | 41858686 |          |
|                | rs60248638  | Imputed   | 6.65E-08 | 41858696 |          |
|                | rs56121764  | Imputed   | 7.16E-08 | 41858979 |          |
|                | rs9873207   | Imputed   | 7.78E-08 | 41859754 |          |
|                | rs112736802 | Imputed   | 6.64E-08 | 41859871 |          |
|                | rs7642083   | Imputed   | 7.16E-08 | 41859903 |          |
|                | rs56081180  | Imputed   | 7.16E-08 | 41860243 |          |
|                | rs56036624  | Imputed   | 7.16E-08 | 41860343 |          |
|                | rs56158380  | Imputed   | 7.16E-08 | 41860592 |          |
|                | rs9823027   | Imputed   | 7.16E-08 | 41860659 |          |
|                | rs9840532   | Imputed   | 7.15E-08 | 41860701 |          |
|                | rs11928580  | Imputed   | 7.15E-08 | 41860726 |          |
|                | rs11917248  | Imputed   | 7.15E-08 | 41860727 |          |
|                | rs17282671  | Imputed   | 6.62E-08 | 41862459 |          |
|                | rs6797165   | Imputed   | 6.91E-08 | 41862781 |          |
|                | rs73079360  | Imputed   | 6.22E-08 | 41863376 |          |
|                | rs17216919  | Imputed   | 6.12E-08 | 41863942 |          |
|                | rs9820192   | Imputed   | 6.40E-08 | 41864285 |          |
|                | rs9824731   | Imputed   | 6.40E-08 | 41864702 |          |
|                | rs28702390  | Imputed   | 6.40E-08 | 41864924 |          |
|                | rs6791806   | Imputed   | 6.59E-08 | 41864999 |          |
|                | rs73081321  | Imputed   | 6.12E-08 | 41865235 |          |
|                | rs17064124  | Imputed   | 6.40E-08 | 41865807 |          |
|                | rs9850310   | Imputed   | 6.40E-08 | 41866102 |          |
|                | rs9854954   | Imputed   | 6.40E-08 | 41866664 |          |
|                | rs12107693  | Imputed   | 6.40E-08 | 41867460 |          |
|                | rs12107296  | Imputed   | 6.39E-08 | 41867507 |          |
|                | rs58212289  | Imputed   | 6.16E-07 | 41867647 |          |
|                | rs56134026  | Imputed   | 6.16E-07 | 41867648 |          |
|                | rs57653201  | Imputed   | 6.39E-08 | 41867697 |          |
|                | rs9883369   | Imputed   | 6.39E-08 | 41868775 |          |
|                | rs6802340   | Imputed   | 6.39E-08 | 41869038 |          |
|                | rs9846634   | Imputed   | 6.39E-08 | 41869053 |          |
|                | rs1016669   | Imputed   | 6.57E-08 | 41869444 |          |
|                | rs9823254   | Imputed   | 6.39E-08 | 41869772 |          |
|                | rs73081335  | Imputed   | 6.11E-08 | 41870181 |          |
|                | rs9865780   | Imputed   | 6.38E-08 | 41870806 |          |
|                | rs9828398   | Imputed   | 6.38E-08 | 41870897 |          |
|                | rs9866092   | Imputed   | 6.38E-08 | 41870971 |          |
|                | rs57162396  | Imputed   | 6.11E-08 | 41871035 |          |
|                | rs6763829   | Imputed   | 6.38E-08 | 41872050 |          |

|                  |                |                 |                 |
|------------------|----------------|-----------------|-----------------|
| rs1994157        | Genotyped      | 1.04E-07        | 41872486        |
| rs7426868        | Imputed        | 6.95E-08        | 41873008        |
| rs2888133        | Imputed        | 6.37E-08        | 41873058        |
| rs35167597       | Imputed        | 6.10E-08        | 41873112        |
| rs1716699        | Imputed        | 0.31734         | 41873276        |
| rs73830532       | Imputed        | 6.09E-08        | 41873818        |
| rs73081341       | Imputed        | 6.95E-08        | 41875339        |
| rs11719319       | Imputed        | 0.59345         | 41875528        |
| rs2625667        | Imputed        | 6.36E-08        | 41875955        |
| rs1717028        | Imputed        | 6.10E-08        | 41877968        |
| rs1716674        | Imputed        | 6.10E-08        | 41877976        |
| rs1716676        | Imputed        | 6.07E-08        | 41878212        |
| rs9832548        | Imputed        | 6.04E-08        | 41878495        |
| rs11718429       | Imputed        | 0.59381         | 41878496        |
| rs73081347       | Imputed        | 5.85E-08        | 41878586        |
| rs1607908        | Imputed        | 5.92E-08        | 41880200        |
| rs1716679        | Imputed        | 5.91E-08        | 41880343        |
| rs1717031        | Imputed        | 5.88E-08        | 41880795        |
| rs2625668        | Imputed        | 5.87E-08        | 41880934        |
| rs1613759        | Imputed        | 5.85E-08        | 41881187        |
| rs1615543        | Imputed        | 5.84E-08        | 41881408        |
| rs73081353       | Imputed        | 5.84E-08        | 41881452        |
| rs1716668        | Imputed        | 5.75E-08        | 41882854        |
| rs78531852       | Imputed        | 0.10316         | 41883128        |
| rs116202370      | Imputed        | 5.74E-08        | 41883277        |
| rs59138513       | Imputed        | 5.63E-08        | 41883615        |
| rs60796012       | Imputed        | 5.63E-08        | 41883672        |
| rs1716669        | Imputed        | 5.74E-08        | 41883685        |
| rs9874513        | Imputed        | 5.73E-08        | 41884512        |
| rs1717033        | Imputed        | 5.73E-08        | 41885220        |
| rs1716670        | Genotyped      | 0.92629         | 41885575        |
| rs73081361       | Imputed        | 6.47E-08        | 41887539        |
| rs9815354        | Imputed        | 5.73E-08        | 41887655        |
| rs73081363       | Imputed        | 0.00017255      | 41888482        |
| rs73081364       | Imputed        | 5.72E-08        | 41888620        |
| rs1717018        | Imputed        | 5.72E-08        | 41888621        |
| rs1617271        | Imputed        | 5.72E-08        | 41889004        |
| rs1619558        | Imputed        | 5.72E-08        | 41889217        |
| rs6599185        | Imputed        | 6.46E-08        | 41889734        |
| rs17283243       | Imputed        | 5.62E-08        | 41889796        |
| rs2683696        | Imputed        | 5.72E-08        | 41889902        |
| rs2683695        | Imputed        | 5.72E-08        | 41889932        |
| rs13325965       | Imputed        | 5.65E-08        | 41889946        |
| rs114540218      | Imputed        | 1.84E-05        | 41890377        |
| rs2683694        | Imputed        | 5.62E-08        | 41890378        |
| rs1717017        | Imputed        | 5.65E-08        | 41890620        |
| rs73081370       | Imputed        | 5.62E-08        | 41891262        |
| rs1717015        | Imputed        | 5.72E-08        | 41892208        |
| rs1717014        | Imputed        | 5.72E-08        | 41892399        |
| rs73081372       | Imputed        | 5.62E-08        | 41892997        |
| rs1716657        | Imputed        | 5.71E-08        | 41893460        |
| rs1716655        | Imputed        | 5.71E-08        | 41893710        |
| rs9839213        | Imputed        | 5.71E-08        | 41893996        |
| rs10865914       | Imputed        | 5.71E-08        | 41894503        |
| rs73081378       | Imputed        | 6.46E-08        | 41895193        |
| rs6794477        | Imputed        | 5.71E-08        | 41895405        |
| rs34327029       | Imputed        | 0.30348         | 41895427        |
| rs73081383       | Imputed        | 6.46E-08        | 41895618        |
| rs73081385       | Imputed        | 8.37E-08        | 41896577        |
| <b>rs1716641</b> | <b>Imputed</b> | <b>4.35E-08</b> | <b>41896685</b> |
| rs79211428       | Imputed        | 5.61E-08        | 41896814        |
| rs61661916       | Imputed        | 5.61E-08        | 41896919        |
| rs1716690        | Imputed        | 5.71E-08        | 41897106        |
| rs73081392       | Imputed        | 5.61E-08        | 41898013        |

|                |                  |                  |                 |        |          |      |                 |          |
|----------------|------------------|------------------|-----------------|--------|----------|------|-----------------|----------|
|                | rs1716683        | Imputed          | 5.71E-08        |        |          |      | 41898078        |          |
|                | rs17217536       | Imputed          | 5.61E-08        |        |          |      | 41898304        |          |
|                | rs17283481       | Imputed          | 5.61E-08        |        |          |      | 41899019        |          |
|                | rs1716996        | Imputed          | 5.71E-08        |        |          |      | 41899298        |          |
|                | rs1716997        | Imputed          | 5.71E-08        |        |          |      | 41899337        |          |
|                | rs1716685        | Imputed          | 5.63E-08        |        |          |      | 41900305        |          |
| ULK4_Exon_17   |                  |                  |                 |        |          |      | 41900370        | 41900448 |
|                | <b>rs1052501</b> | <b>Genotyped</b> | <b>5.08E-08</b> |        |          |      | <b>41900402</b> |          |
| ULK4_Intron_16 |                  |                  |                 |        |          |      | 41900449        | 41912013 |
|                |                  |                  |                 | FOXL1  | TransFac | 2.12 | 41900933        | 41900949 |
|                | rs17217746       | Imputed          | 5.62E-08        |        |          |      | 41901025        |          |
|                | rs17283677       | Imputed          | 5.62E-08        |        |          |      | 41901152        |          |
|                | rs1716688        | Imputed          | 5.71E-08        |        |          |      | 41901550        |          |
|                | rs73083326       | Imputed          | 5.63E-08        |        |          |      | 41902154        |          |
|                | rs73083329       | Imputed          | 5.63E-08        |        |          |      | 41902155        |          |
|                | rs4973991        | Imputed          | 5.72E-08        |        |          |      | 41902277        |          |
|                | rs1629460        | Imputed          | 5.72E-08        |        |          |      | 41902453        |          |
|                | rs1629462        | Imputed          | 5.72E-08        |        |          |      | 41902456        |          |
|                | rs73083333       | Imputed          | 6.47E-08        |        |          |      | 41902509        |          |
|                | rs9838965        | Imputed          | 5.72E-08        |        |          |      | 41902942        |          |
|                | rs9839399        | Imputed          | 5.64E-08        |        |          |      | 41903048        |          |
|                | rs9839491        | Imputed          | 5.72E-08        |        |          |      | 41903305        |          |
|                | rs56167033       | Imputed          | 6.47E-08        |        |          |      | 41903321        |          |
|                | rs112580981      | Imputed          | 0.1897          |        |          |      | 41904279        |          |
|                | rs59873855       | Imputed          | 5.64E-08        |        |          |      | 41904542        |          |
|                | rs1716660        | Imputed          | 5.73E-08        |        |          |      | 41904964        |          |
|                | rs1716999        | Imputed          | 5.73E-08        |        |          |      | 41905045        |          |
|                | rs1717000        | Imputed          | 5.64E-08        |        |          |      | 41905223        |          |
|                | rs73087366       | Imputed          | 0.46116         |        |          |      | 41905368        |          |
|                | rs73087368       | Imputed          | 5.64E-08        |        |          |      | 41905383        |          |
|                | rs4973995        | Imputed          | 5.73E-08        |        |          |      | 41906477        |          |
|                | rs76313799       | Imputed          | 8.41E-08        |        |          |      | 41906755        |          |
|                | rs76276404       | Imputed          | 8.41E-08        |        |          |      | 41906774        |          |
|                | rs113941228      | Imputed          | 5.65E-08        |        |          |      | 41907080        |          |
|                | rs62258655       | Imputed          | 5.73E-08        |        |          |      | 41907334        |          |
|                | rs113059632      | Imputed          | 5.65E-08        |        |          |      | 41907862        |          |
|                | rs11717540       | Imputed          | 5.74E-08        |        |          |      | 41907942        |          |
|                | rs113772069      | Imputed          | 5.66E-08        |        |          |      | 41908393        |          |
|                | rs1717001        | Imputed          | 5.75E-08        |        |          |      | 41909953        |          |
|                | rs61405159       | Imputed          | 3.73E-05        |        |          |      | 41910134        |          |
|                | rs1716696        | Imputed          | 5.75E-08        |        |          |      | 41910815        |          |
|                | rs1717002        | Imputed          | 5.75E-08        |        |          |      | 41911672        |          |
|                | rs73087378       | Imputed          | 5.67E-08        |        |          |      | 41911831        |          |
|                | rs1717003        | Imputed          | 5.75E-08        |        |          |      | 41912004        |          |
|                |                  |                  |                 | E4BP4  | TransFac | 2.01 | 41912007        | 41912019 |
|                |                  |                  |                 | POU2F1 | TransFac | 2.2  | 41912012        | 41912026 |
| ULK4_Exon_16   |                  |                  |                 |        |          |      | 41912014        | 41912060 |
| ULK4_Intron_15 |                  |                  |                 |        |          |      | 41912061        | 41913317 |
|                | rs74371586       | Imputed          | 5.68E-08        |        |          |      | 41912894        |          |
|                | rs77572508       | Imputed          | 6.53E-08        |        |          |      | 41913048        |          |
| ULK4_Exon_15   |                  |                  |                 |        |          |      | 41913318        | 41913499 |
|                |                  |                  |                 | FAC1   | TransFac | 2.24 | 41913359        | 41913373 |
| ULK4_Intron_14 |                  |                  |                 |        |          |      | 41913500        | 41914927 |
|                | rs73069203       | Imputed          | 6.53E-08        |        |          |      | 41913771        |          |
|                | rs73069208       | Imputed          | 5.68E-08        |        |          |      | 41914202        |          |
|                |                  |                  |                 | MZF-1  | TransFac | 2.23 | 41914696        | 41914704 |
|                | rs73069209       | Imputed          | 5.68E-08        |        |          |      | 41914785        |          |
| ULK4_Exon_14   |                  |                  |                 |        |          |      | 41914928        | 41914988 |
|                |                  |                  |                 | Lmo2   | TransFac | 2.03 | 41914982        | 41914991 |
| ULK4_Intron_13 |                  |                  |                 |        |          |      | 41914989        | 41917220 |
|                | rs1717006        | Imputed          | 5.65E-08        |        |          |      | 41915452        |          |
|                | rs73069213       | Imputed          | 5.68E-08        |        |          |      | 41915594        |          |
|                | rs17283929       | Imputed          | 5.69E-08        |        |          |      | 41916902        |          |
|                | rs1717007        | Imputed          | 5.77E-08        |        |          |      | 41917203        |          |

|                |                   |                |                 |          |          |      |                 |          |
|----------------|-------------------|----------------|-----------------|----------|----------|------|-----------------|----------|
| ULK4_Exon_13   |                   |                |                 | SREBP-1a | TransFac | 2.59 | 41917221        | 41917325 |
|                |                   |                |                 | Arnt     | TransFac | 2.09 | 41917237        | 41917248 |
|                |                   |                |                 |          |          |      | 41917300        | 41917320 |
| ULK4_Intron_12 |                   |                |                 |          |          |      | 41917326        | 41924340 |
|                | rs4615050         | Imputed        | 5.77E-08        |          |          |      | 41917502        |          |
|                | rs60664243        | Imputed        | 5.69E-08        |          |          |      | 41917668        |          |
|                | <b>rs17218103</b> | <b>Imputed</b> | <b>4.09E-08</b> |          |          |      | <b>41918728</b> |          |
|                | rs111671485       | Imputed        | 2.82E-05        |          |          |      | 41919084        |          |
|                | rs62258656        | Imputed        | 0.18358         |          |          |      | 41919761        |          |
|                | rs1613233         | Imputed        | 5.79E-08        |          |          |      | 41920148        |          |
|                | rs77778906        | Imputed        | 5.72E-08        |          |          |      | 41920616        |          |
|                | rs77732985        | Imputed        | 5.72E-08        |          |          |      | 41920876        |          |
|                | rs115965381       | Imputed        | 6.59E-08        |          |          |      | 41920945        |          |
|                | rs1717009         | Imputed        | 5.80E-08        |          |          |      | 41921312        |          |
|                | rs59476821        | Imputed        | 5.73E-08        |          |          |      | 41921485        |          |
|                | rs1717010         | Imputed        | 5.80E-08        |          |          |      | 41921907        |          |
|                | rs11705749        | Imputed        | 5.81E-08        |          |          |      | 41922298        |          |
|                | rs79741604        | Imputed        | 6.60E-08        |          |          |      | 41922325        |          |
|                | rs13063523        | Imputed        | 0.0001917       |          |          |      | 41922441        |          |
|                | rs1717012         | Imputed        | 5.81E-08        |          |          |      | 41923259        |          |
|                | rs1716664         | Imputed        | 5.81E-08        |          |          |      | 41923382        |          |
|                | rs9838537         | Genotyped      | 0.63282         |          |          |      | 41923669        |          |
|                | rs78342280        | Imputed        | 5.75E-08        |          |          |      | 41923814        |          |
|                | rs59146151        | Imputed        | 5.75E-08        |          |          |      | 41924305        |          |
| ULK4_Exon_12   |                   |                |                 |          |          |      | 41924341        | 41924437 |
| ULK4_Intron_11 |                   |                |                 |          |          |      | 41924438        | 41927812 |
|                | rs60659106        | Imputed        | 5.75E-08        |          |          |      | 41924573        |          |
|                | rs13076952        | Imputed        | 5.82E-08        |          |          |      | 41925037        |          |
|                | rs73069237        | Imputed        | 5.76E-08        |          |          |      | 41925316        |          |
|                | rs112245154       | Imputed        | 6.63E-08        |          |          |      | 41925524        |          |
|                | rs73069240        | Imputed        | 5.77E-08        |          |          |      | 41925977        |          |
|                | rs11308872        | Imputed        | 0.36684         |          |          |      | 41926061        |          |
|                | rs12330363        | Imputed        | 5.83E-08        |          |          |      | 41926190        |          |
|                | rs114414255       | Imputed        | 0.023422        |          |          |      | 41926353        |          |
|                | rs73069245        | Imputed        | 5.77E-08        |          |          |      | 41926456        |          |
|                | rs113528686       | Imputed        | 5.77E-08        |          |          |      | 41926551        |          |
|                | rs13087719        | Imputed        | 5.83E-08        |          |          |      | 41926580        |          |
|                | rs13088394        | Imputed        | 5.83E-08        |          |          |      | 41926719        |          |
|                | rs11711210        | Imputed        | 6.22E-08        |          |          |      | 41926956        |          |
|                | rs4547673         | Imputed        | 7.24E-08        |          |          |      | 41927307        |          |
|                | rs4299460         | Imputed        | 7.68E-08        |          |          |      | 41927449        |          |
|                | rs4264702         | Imputed        | 7.73E-08        |          |          |      | 41927543        |          |
|                | rs4577439         | Imputed        | 7.73E-08        |          |          |      | 41927544        |          |
|                |                   |                |                 | AREB6    | TransFac | 2.01 | 41927805        | 41927818 |
| ULK4_Exon_11   |                   |                |                 |          |          |      | 41927813        | 41927882 |
|                |                   |                |                 | POU3F2   | TransFac | 2.29 | 41927824        | 41927838 |
|                | rs35263917        | Imputed        | 7.86E-08        |          |          |      | 41927856        |          |
| ULK4_Intron_10 |                   |                |                 |          |          |      | 41927883        | 41928036 |
| ULK4_Exon_10   |                   |                |                 |          |          |      | 41928037        | 41928155 |
| ULK4_Intron_9  |                   |                |                 |          |          |      | 41928156        | 41929302 |
|                | rs75651509        | Imputed        | 7.88E-08        |          |          |      | 41928568        |          |
| ULK4_Exon_9    |                   |                |                 |          |          |      | 41929303        | 41929395 |
| ULK4_Intron_8  |                   |                |                 |          |          |      | 41929396        | 41932472 |
|                | rs9822598         | Imputed        | 7.41E-08        |          |          |      | 41929591        |          |
|                | rs9822288         | Imputed        | 7.41E-08        |          |          |      | 41929592        |          |
|                | rs34982278        | Imputed        | 0.29137         |          |          |      | 41930468        |          |
|                | rs1628874         | Imputed        | 7.43E-08        |          |          |      | 41930718        |          |
|                | rs74282515        | Imputed        | 0.31745         |          |          |      | 41930820        |          |
|                | rs1717034         | Imputed        | 7.44E-08        |          |          |      | 41930917        |          |
|                | rs1716698         | Imputed        | 7.70E-08        |          |          |      | 41932470        |          |
| ULK4_Exon_8    |                   |                |                 |          |          |      | 41932473        | 41932548 |
|                |                   |                |                 | Pbx1a    | TransFac | 2.21 | 41932498        | 41932513 |
| ULK4_Intron_7  |                   |                |                 |          |          |      | 41932549        | 41934952 |
|                | rs12108049        | Imputed        | 9.11E-08        |          |          |      | 41933165        |          |



|               |             |           |          |       |          |      |          |          |
|---------------|-------------|-----------|----------|-------|----------|------|----------|----------|
|               | rs77047799  | Imputed   | 1.00E-07 |       |          |      | 41933899 |          |
|               | rs7617397   | Imputed   | 9.07E-08 |       |          |      | 41934041 |          |
|               | rs55899232  | Imputed   | 1.07E-07 |       |          |      | 41934361 |          |
|               | rs13321282  | Imputed   | 9.51E-08 |       |          |      | 41934456 |          |
| ULK4_Exon_7   |             |           |          |       |          |      | 41934953 | 41935036 |
|               | rs1716975   | Genotyped | 1.49E-06 |       |          |      | 41935010 |          |
|               |             |           |          | STAT3 | TransFac | 2.99 | 41935026 | 41935047 |
| ULK4_Intron_6 |             |           |          |       |          |      | 41935037 | 41936212 |
|               | rs1716979   | Genotyped | 0.15674  |       |          |      | 41936172 |          |
| ULK4_Exon_6   |             |           |          |       |          |      | 41936213 | 41936314 |
| ULK4_Intron_5 |             |           |          |       |          |      | 41936315 | 41948339 |
|               | rs1716981   | Imputed   | 1.02E-07 |       |          |      | 41937666 |          |
|               | rs1716661   | Imputed   | 1.02E-07 |       |          |      | 41937822 |          |
|               | rs55820810  | Imputed   | 1.18E-07 |       |          |      | 41937836 |          |
|               | rs1716982   | Imputed   | 1.02E-07 |       |          |      | 41937967 |          |
|               | rs1716983   | Imputed   | 1.02E-07 |       |          |      | 41939132 |          |
|               | rs76319026  | Imputed   | 1.18E-07 |       |          |      | 41939546 |          |
|               | rs9809833   | Imputed   | 1.02E-07 |       |          |      | 41939652 |          |
|               | rs1615243   | Imputed   | 1.02E-07 |       |          |      | 41940238 |          |
|               | rs1716984   | Imputed   | 1.02E-07 |       |          |      | 41940536 |          |
|               | rs1716642   | Imputed   | 7.83E-08 |       |          |      | 41940869 |          |
|               | rs1716643   | Imputed   | 1.02E-07 |       |          |      | 41942196 |          |
|               | rs73069277  | Imputed   | 6.33E-06 |       |          |      | 41942525 |          |
|               | rs1612124   | Imputed   | 1.02E-07 |       |          |      | 41942897 |          |
|               | rs1716644   | Imputed   | 1.02E-07 |       |          |      | 41943032 |          |
|               | rs1716985   | Imputed   | 1.02E-07 |       |          |      | 41943898 |          |
|               | rs35116501  | Imputed   | 0.29887  |       |          |      | 41945043 |          |
|               | rs1716645   | Imputed   | 1.02E-07 |       |          |      | 41945484 |          |
|               | rs1716987   | Imputed   | 1.02E-07 |       |          |      | 41945520 |          |
|               | rs7622665   | Imputed   | 1.02E-07 |       |          |      | 41945747 |          |
|               | rs1716988   | Imputed   | 0.2982   |       |          |      | 41945929 |          |
|               | rs7616780   | Imputed   | 1.02E-07 |       |          |      | 41946563 |          |
|               | rs1716989   | Imputed   | 1.02E-07 |       |          |      | 41947190 |          |
|               | rs1716990   | Imputed   | 1.02E-07 |       |          |      | 41947213 |          |
|               | rs1716648   | Imputed   | 1.02E-07 |       |          |      | 41947853 |          |
|               | rs73069285  | Imputed   | 0.19043  |       |          |      | 41947970 |          |
|               | rs114534088 | Imputed   | 0.25809  |       |          |      | 41947985 |          |
| ULK4_Exon_5   |             |           |          |       |          |      | 41948340 | 41948502 |
| ULK4_Intron_4 |             |           |          |       |          |      | 41948503 | 41952296 |
|               | rs73069292  | Imputed   | 1.18E-07 |       |          |      | 41948967 |          |
|               | rs1716993   | Imputed   | 1.02E-07 |       |          |      | 41949560 |          |
|               | rs1716651   | Imputed   | 1.02E-07 |       |          |      | 41950103 |          |
|               | rs1716652   | Imputed   | 1.02E-07 |       |          |      | 41950539 |          |
|               | rs1716653   | Imputed   | 1.02E-07 |       |          |      | 41950602 |          |
|               | rs17218264  | Imputed   | 6.28E-08 |       |          |      | 41950851 |          |
|               | rs939558    | Imputed   | 1.02E-07 |       |          |      | 41951044 |          |
|               | rs56207540  | Imputed   | 1.18E-07 |       |          |      | 41951631 |          |
|               | rs34121549  | Imputed   | 1.02E-07 |       |          |      | 41951777 |          |
|               | rs111419796 | Imputed   | 1.18E-07 |       |          |      | 41951972 |          |
|               | rs3934103   | Imputed   | 7.83E-08 |       |          |      | 41952218 |          |
| ULK4_Exon_4   |             |           |          |       |          |      | 41952297 | 41952436 |
| ULK4_Intron_3 |             |           |          |       |          |      | 41952437 | 41954593 |
|               | rs73071203  | Imputed   | 1.18E-07 |       |          |      | 41952468 |          |
|               | rs58069203  | Imputed   | 0.083409 |       |          |      | 41952494 |          |
|               | rs73071208  | Imputed   | 1.18E-07 |       |          |      | 41953742 |          |
| ULK4_Exon_3   |             |           |          |       |          |      | 41954594 | 41954693 |
| ULK4_Intron_2 |             |           |          |       |          |      | 41954694 | 41971117 |
|               | rs1717011   | Imputed   | 1.02E-07 |       |          |      | 41955203 |          |
|               | rs1717020   | Imputed   | 9.79E-08 |       |          |      | 41956494 |          |
|               | rs73071212  | Imputed   | 1.18E-07 |       |          |      | 41956860 |          |
|               | rs113611706 | Imputed   | 1.18E-07 |       |          |      | 41958246 |          |
|               | rs1716692   | Imputed   | 1.02E-07 |       |          |      | 41958790 |          |
|               | rs1717021   | Imputed   | 1.01E-07 |       |          |      | 41958864 |          |
|               | rs1717022   | Imputed   | 0.19026  |       |          |      | 41959045 |          |

|               |           |           |           |          |      |  |          |          |
|---------------|-----------|-----------|-----------|----------|------|--|----------|----------|
| rs13071018    | Imputed   | 0.0043109 |           |          |      |  | 41959090 |          |
| rs1717023     | Imputed   | 1.01E-07  |           |          |      |  | 41959217 |          |
| rs113300894   | Imputed   | 4.80E-06  |           |          |      |  | 41959247 |          |
| rs116126274   | Imputed   | 0.01705   |           |          |      |  | 41959725 |          |
| rs10707754    | Imputed   | 1.01E-07  |           |          |      |  | 41959779 |          |
| rs1624519     | Imputed   | 1.01E-07  |           |          |      |  | 41959804 |          |
| rs1717024     | Imputed   | 9.68E-08  |           |          |      |  | 41959892 |          |
| rs11129935    | Imputed   | 1.18E-07  |           |          |      |  | 41960207 |          |
| rs1716693     | Imputed   | 1.00E-07  |           |          |      |  | 41960604 |          |
| rs9876960     | Imputed   | 1.00E-07  |           |          |      |  | 41960816 |          |
| rs1716694     | Imputed   | 1.00E-07  |           |          |      |  | 41961403 |          |
| rs17284313    | Imputed   | 8.82E-08  |           |          |      |  | 41961791 |          |
| rs73071222    | Imputed   | 1.20E-07  |           |          |      |  | 41961900 |          |
| rs17218441    | Imputed   | 1.20E-07  |           |          |      |  | 41962048 |          |
| rs17218504    | Imputed   | 1.46E-07  |           |          |      |  | 41962282 |          |
| rs10716860    | Imputed   | 0.21308   |           |          |      |  | 41962528 |          |
| rs1717027     | Imputed   | 1.00E-07  |           |          |      |  | 41962924 |          |
| rs1716695     | Imputed   | 1.00E-07  |           |          |      |  | 41963699 |          |
| rs113803925   | Imputed   | 1.21E-07  |           |          |      |  | 41964863 |          |
| rs7372217     | Imputed   | 1.00E-07  |           |          |      |  | 41965126 |          |
| rs114548962   | Imputed   | 1.21E-07  |           |          |      |  | 41965811 |          |
| rs116570063   | Imputed   | 1.25E-06  |           |          |      |  | 41965813 |          |
| rs12330747    | Imputed   | 1.00E-07  |           |          |      |  | 41965833 |          |
| rs73071236    | Imputed   | 1.21E-07  |           |          |      |  | 41967046 |          |
| rs73071238    | Imputed   | 1.21E-07  |           |          |      |  | 41967247 |          |
| rs6599192     | Imputed   | 1.00E-07  |           |          |      |  | 41967412 |          |
| rs112787664   | Imputed   | 1.21E-07  |           |          |      |  | 41967445 |          |
| rs73071239    | Imputed   | 1.21E-07  |           |          |      |  | 41967614 |          |
| rs79440140    | Imputed   | 5.07E-06  |           |          |      |  | 41967894 |          |
| rs73071242    | Imputed   | 1.21E-07  |           |          |      |  | 41968015 |          |
| rs56983571    | Imputed   | 1.21E-07  |           |          |      |  | 41969477 |          |
| rs11712394    | Imputed   | 1.21E-07  |           |          |      |  | 41969783 |          |
| rs113923306   | Imputed   | 1.91E-07  |           |          |      |  | 41969952 |          |
| rs6807562     | Imputed   | 1.21E-07  |           |          |      |  | 41970659 |          |
| rs6805140     | Imputed   | 1.21E-07  |           |          |      |  | 41970795 |          |
| rs114499224   | Imputed   | 5.76E-05  |           |          |      |  | 41970855 |          |
| ULK4_Exon_2   |           |           |           |          |      |  | 41971118 | 41971303 |
| rs2272007     | Genotyped | 7.19E-08  |           |          |      |  | 41971140 |          |
|               |           |           | TBP       | TransFac | 2.09 |  | 41971187 | 41971202 |
| ULK4_Intron_1 |           |           |           |          |      |  | 41971304 | 41978511 |
| rs17284472    | Imputed   | 8.87E-08  |           |          |      |  | 41971308 |          |
| rs73830583    | Imputed   | 1.21E-07  |           |          |      |  | 41971952 |          |
| rs2272006     | Imputed   | 1.00E-07  |           |          |      |  | 41972063 |          |
| rs60690674    | Imputed   | 1.47E-07  |           |          |      |  | 41972815 |          |
| rs9842305     | Imputed   | 1.00E-07  |           |          |      |  | 41973416 |          |
| rs112490357   | Imputed   | 8.04E-06  |           |          |      |  | 41973944 |          |
| rs56728371    | Imputed   | 1.21E-07  |           |          |      |  | 41974385 |          |
| rs80066790    | Imputed   | 1.21E-07  |           |          |      |  | 41975847 |          |
| rs1474219     | Imputed   | 1.01E-07  |           |          |      |  | 41975917 |          |
| rs79323474    | Imputed   | 1.21E-07  |           |          |      |  | 41975977 |          |
| rs73071259    | Imputed   | 1.26E-06  |           |          |      |  | 41976851 |          |
| rs7639859     | Imputed   | 1.21E-07  |           |          |      |  | 41976991 |          |
| rs55916855    | Imputed   | 1.22E-07  |           |          |      |  | 41977765 |          |
| rs11717170    | Imputed   | 1.01E-07  |           |          |      |  | 41977815 |          |
| rs73071261    | Imputed   | 1.22E-07  |           |          |      |  | 41978373 |          |
| ULK4_Exon_1   |           |           |           |          |      |  | 41978512 | 41978664 |
| rs73830585    | Imputed   | 1.47E-07  |           |          |      |  | 41978702 |          |
|               |           |           | mod073652 | PreMod   | 11   |  | 41978915 | 41979112 |
| rs62257277    | Imputed   | 0.12057   |           |          |      |  | 41979232 |          |
| rs56201224    | Imputed   | 1.47E-07  |           |          |      |  | 41979431 |          |
| rs55953604    | Imputed   | 1.47E-07  |           |          |      |  | 41979432 |          |
| rs4434125     | Imputed   | 1.22E-07  |           |          |      |  | 41979685 |          |
| rs4258935     | Imputed   | 0.0044669 |           |          |      |  | 41979697 |          |
| rs2090801     | Imputed   | 1.00E-07  |           |          |      |  | 41979785 |          |

|             |           |          |          |
|-------------|-----------|----------|----------|
| rs56290987  | Imputed   | 1.22E-07 | 41979886 |
| rs60966614  | Imputed   | 1.25E-06 | 41980170 |
| rs12492599  | Imputed   | 1.01E-07 | 41980738 |
| rs73073226  | Imputed   | 1.22E-07 | 41980842 |
| rs74947509  | Imputed   | 1.22E-07 | 41981327 |
| rs73073228  | Imputed   | 1.26E-06 | 41982054 |
| rs10510732  | Imputed   | 8.90E-08 | 41982343 |
| rs73073229  | Imputed   | 1.22E-07 | 41982854 |
| rs113379006 | Imputed   | 1.22E-07 | 41983190 |
| rs73073230  | Imputed   | 1.22E-07 | 41983267 |
| rs113144620 | Imputed   | 1.22E-07 | 41983316 |
| rs78629637  | Imputed   | 1.22E-07 | 41983785 |
| rs10510733  | Imputed   | 1.22E-07 | 41984196 |
| rs9835059   | Imputed   | 1.01E-07 | 41984730 |
| rs73073233  | Imputed   | 1.23E-07 | 41985554 |
| rs73073234  | Imputed   | 1.24E-07 | 41987075 |
| rs73073235  | Imputed   | 1.02E-07 | 41987697 |
| rs56332587  | Imputed   | 1.25E-07 | 41987718 |
| rs7373694   | Imputed   | 1.02E-07 | 41987723 |
| rs58916656  | Imputed   | 1.25E-07 | 41987785 |
| rs9856633   | Imputed   | 9.87E-08 | 41988854 |
| rs73073238  | Imputed   | 1.33E-07 | 41989329 |
| rs73073239  | Imputed   | 7.27E-06 | 41989601 |
| rs13087502  | Imputed   | 6.79E-06 | 41990114 |
| rs73073242  | Imputed   | 8.37E-06 | 41990339 |
| rs73073245  | Imputed   | 8.44E-06 | 41991150 |
| rs12108064  | Imputed   | 6.24E-06 | 41991221 |
| rs73073250  | Imputed   | 8.48E-06 | 41991563 |
| rs73073252  | Imputed   | 6.28E-06 | 41991895 |
| rs115754309 | Imputed   | 8.55E-06 | 41992250 |
| rs73073253  | Imputed   | 8.56E-06 | 41992498 |
| rs13084436  | Imputed   | 6.31E-06 | 41992541 |
| rs17218866  | Imputed   | 8.58E-06 | 41992638 |
| rs6796078   | Imputed   | 6.33E-06 | 41992824 |
| rs73073258  | Imputed   | 1.09E-05 | 41992898 |
| rs6801339   | Imputed   | 6.34E-06 | 41993237 |
| rs73073262  | Imputed   | 8.63E-06 | 41993447 |
| rs73073263  | Imputed   | 8.65E-06 | 41993670 |
| rs17218936  | Imputed   | 5.68E-06 | 41994396 |
| rs7634985   | Genotyped | 6.39E-06 | 41994569 |
| rs7652369   | Imputed   | 6.50E-06 | 41995977 |
| rs73073266  | Imputed   | 8.84E-06 | 41996120 |
| rs73073267  | Imputed   | 8.84E-06 | 41996167 |
| rs73073268  | Imputed   | 8.86E-06 | 41996407 |
| rs1851149   | Imputed   | 6.54E-06 | 41996712 |
| rs80120812  | Imputed   | 8.89E-06 | 41996764 |
| rs111788014 | Imputed   | 8.89E-06 | 41996800 |
| rs73073270  | Imputed   | 8.91E-06 | 41997149 |
| rs73073272  | Imputed   | 8.93E-06 | 41997450 |
| rs73073274  | Imputed   | 8.96E-06 | 41997814 |
| rs6798152   | Imputed   | 6.65E-06 | 41998562 |
| rs79626430  | Imputed   | 9.04E-06 | 41998790 |
| rs2683692   | Imputed   | 6.70E-06 | 41999531 |
| rs7647902   | Imputed   | 0.57843  | 41999669 |
| rs112310714 | Imputed   | 9.13E-06 | 41999801 |
| rs73073276  | Imputed   | 4.00E-05 | 42000358 |
| rs78662667  | Imputed   | 9.20E-06 | 42000583 |
| rs73073280  | Imputed   | 9.20E-06 | 42000776 |
| rs794902    | Imputed   | 6.79E-06 | 42000943 |
| rs73073281  | Imputed   | 1.17E-05 | 42001370 |
| rs56008529  | Imputed   | 1.17E-05 | 42001759 |
| rs56865718  | Imputed   | 9.34E-06 | 42002251 |
| rs1087599   | Imputed   | 6.89E-06 | 42002367 |
| rs116717051 | Imputed   | 7.14E-05 | 42002415 |

|             |           |           |       |          |      |          |          |
|-------------|-----------|-----------|-------|----------|------|----------|----------|
| rs73073285  | Imputed   | 9.37E-06  |       |          |      | 42002570 |          |
| rs73073288  | Imputed   | 9.37E-06  |       |          |      | 42002641 |          |
| rs73073290  | Imputed   | 9.38E-06  |       |          |      | 42002688 |          |
| rs73073291  | Imputed   | 9.41E-06  |       |          |      | 42003008 |          |
| rs73073292  | Imputed   | 9.41E-06  |       |          |      | 42003027 |          |
| rs73073294  | Imputed   | 9.41E-06  |       |          |      | 42003057 |          |
| rs73073296  | Imputed   | 9.42E-06  |       |          |      | 42003078 |          |
| rs73830596  | Imputed   | 9.43E-06  |       |          |      | 42003227 |          |
| rs78402272  | Imputed   | 9.45E-06  |       |          |      | 42003429 |          |
| rs113496706 | Imputed   | 9.46E-06  |       |          |      | 42003578 |          |
| rs73073298  | Imputed   | 6.98E-06  |       |          |      | 42003661 |          |
| rs794899    | Imputed   | 6.98E-06  |       |          |      | 42003726 |          |
| rs73073301  | Imputed   | 9.48E-06  |       |          |      | 42003781 |          |
| rs61646756  | Imputed   | 9.58E-06  |       |          |      | 42004356 |          |
| rs17284933  | Imputed   | 7.44E-06  |       |          |      | 42004839 |          |
| rs73073302  | Imputed   | 9.67E-06  |       |          |      | 42004883 |          |
| rs113027442 | Imputed   | 5.81E-06  |       |          |      | 42005033 |          |
| rs79239400  | Imputed   | 1.23E-05  |       |          |      | 42005253 |          |
| rs73075204  | Imputed   | 9.82E-06  |       |          |      | 42005396 |          |
| rs115135603 | Imputed   | 1.02E-05  |       |          |      | 42006626 |          |
| rs794897    | Imputed   | 7.59E-06  |       |          |      | 42006869 |          |
| rs75308766  | Imputed   | 1.03E-05  |       |          |      | 42006898 |          |
| rs794896    | Imputed   | 7.60E-06  |       |          |      | 42006906 |          |
| rs794895    | Imputed   | 7.62E-06  |       |          |      | 42006978 |          |
| rs794894    | Genotyped | 5.89E-06  |       |          |      | 42007487 |          |
| rs61182696  | Imputed   | 1.05E-05  |       |          |      | 42007515 |          |
| rs73075211  | Imputed   | 1.09E-05  |       |          |      | 42008428 |          |
| rs75047809  | Imputed   | 1.09E-05  |       |          |      | 42008441 |          |
| rs76127736  | Imputed   | 1.38E-05  |       |          |      | 42008649 |          |
| rs11926737  | Imputed   | 8.24E-06  |       |          |      | 42009011 |          |
| rs794905    | Imputed   | 8.50E-06  |       |          |      | 42009734 |          |
| rs794904    | Imputed   | 8.63E-06  |       |          |      | 42010161 |          |
| rs77014899  | Imputed   | 1.63E-05  |       |          |      | 42012884 |          |
| rs73075219  | Imputed   | 1.33E-05  |       |          |      | 42013433 |          |
| rs57945879  | Imputed   | 1.35E-05  |       |          |      | 42013846 |          |
|             |           |           | TBP   | TransFac | 2.09 | 42015008 | 42015023 |
| rs4246670   | Imputed   | 0.677     |       |          |      | 42015970 |          |
| rs11298306  | Imputed   | 0.15474   |       |          |      | 42017411 |          |
| rs73828505  | Imputed   | 1.11E-05  |       |          |      | 42017718 |          |
| rs7629767   | Genotyped | 1.65E-05  |       |          |      | 42018513 |          |
| rs60525434  | Imputed   | 1.26E-05  |       |          |      | 42019290 |          |
| rs75687617  | Imputed   | 2.13E-05  |       |          |      | 42019668 |          |
| rs113956045 | Imputed   | 2.15E-05  |       |          |      | 42020307 |          |
| rs56212772  | Imputed   | 1.89E-05  |       |          |      | 42021784 |          |
| rs73075224  | Imputed   | 1.88E-05  |       |          |      | 42023252 |          |
| rs62257301  | Imputed   | 0.321     |       |          |      | 42023855 |          |
| rs73075228  | Imputed   | 2.31E-05  |       |          |      | 42024633 |          |
| rs73075230  | Imputed   | 2.00E-05  |       |          |      | 42025628 |          |
| rs116425691 | Imputed   | 0.024005  |       |          |      | 42025717 |          |
|             |           |           | AP-1  | TransFac | 2.01 | 42026162 | 42026175 |
|             |           |           | NRSF  | TransFac | 2.32 | 42026172 | 42026193 |
| rs73075231  | Imputed   | 2.06E-05  |       |          |      | 42026698 |          |
| rs73075234  | Imputed   | 2.42E-05  |       |          |      | 42026805 |          |
| rs12635286  | Imputed   | 2.86E-05  |       |          |      | 42026840 |          |
| rs17219090  | Imputed   | 2.45E-05  |       |          |      | 42026956 |          |
| rs794892    | Imputed   | 2.67E-05  |       |          |      | 42027936 |          |
| rs704964    | Imputed   | 2.92E-05  |       |          |      | 42028903 |          |
| rs78179159  | Imputed   | 0.0046701 |       |          |      | 42029468 |          |
| rs112912733 | Imputed   | 2.28E-05  |       |          |      | 42029914 |          |
|             |           |           | CREB  | TransFac | 3.35 | 42030098 | 42030113 |
|             |           |           | ATF   | TransFac | 3.09 | 42030101 | 42030115 |
|             |           |           | ATF-2 | TransFac | 2.86 | 42030102 | 42030114 |
|             |           |           | Egr-2 | TransFac | 2.21 | 42030240 | 42030252 |
|             |           |           | Egr-3 | TransFac | 2.47 | 42030240 | 42030252 |

|             |           |            |           |          |      |          |          |
|-------------|-----------|------------|-----------|----------|------|----------|----------|
|             |           |            | Egr-1     | TransFac | 2.67 | 42030240 | 42030252 |
|             |           |            | mod073653 | PreMod   | 12   | 42030536 | 42030641 |
| rs939561    | Genotyped | 0.00013195 |           |          |      | 42032105 |          |
| rs73075241  | Imputed   | 2.46E-05   |           |          |      | 42033049 |          |
| rs115702638 | Imputed   | 3.98E-05   |           |          |      | 42033598 |          |
|             |           |            | TBP       | TransFac | 2.15 | 42034998 | 42035013 |
| rs7652506   | Imputed   | 4.38E-05   |           |          |      | 42035239 |          |
| rs12152489  | Imputed   | 2.43E-05   |           |          |      | 42035406 |          |
| rs56994465  | Imputed   | 3.96E-05   |           |          |      | 42036610 |          |
| rs794890    | Imputed   | 3.94E-05   |           |          |      | 42037343 |          |
|             |           |            | AP-1      | TransFac | 1.98 | 42037660 | 42037669 |
|             |           |            | POU3F2    | TransFac | 2.94 | 42037885 | 42037899 |
| rs73075250  | Imputed   | 3.80E-05   |           |          |      | 42038738 |          |
|             |           |            | FOXO4     | TransFac | 2.27 | 42038786 | 42038797 |
| rs809930    | Imputed   | 5.26E-05   |           |          |      | 42040009 |          |
|             |           |            | Sp1       | TransFac | 2.11 | 42040119 | 42040129 |
|             |           |            | Pax-2     | TransFac | 2.35 | 42040635 | 42040644 |
|             |           |            | Hlf       | TransFac | 2.65 | 42041048 | 42041058 |
| rs78138299  | Imputed   | 0.0042073  |           |          |      | 42041509 |          |
| rs111843636 | Imputed   | 0.0153     |           |          |      | 42041637 |          |
| rs17219278  | Imputed   | 0.0042571  |           |          |      | 42041772 |          |
|             |           |            | mod073654 | PreMod   | 11   | 42042172 | 42042335 |
|             |           |            | AP-4      | TransFac | 2.53 | 42042286 | 42042296 |
|             |           |            | E47       | TransFac | 2.4  | 42042319 | 42042335 |
|             |           |            | ITF-2     | TransFac | 2.69 | 42042319 | 42042335 |
| rs17219347  | Genotyped | 0.018052   |           |          |      | 42042673 |          |
| rs9882416   | Imputed   | 0.029958   |           |          |      | 42043083 |          |
| rs9867307   | Imputed   | 0.47001    |           |          |      | 42043790 |          |
| rs11706533  | Imputed   | 0.56842    |           |          |      | 42044191 |          |
| rs112161509 | Imputed   | 0.01542    |           |          |      | 42044365 |          |
| rs6792201   | Imputed   | 0.030341   |           |          |      | 42046256 |          |
| rs112365214 | Imputed   | 0.015285   |           |          |      | 42046433 |          |
| rs28491668  | Imputed   | 0.18135    |           |          |      | 42046870 |          |
| rs111834569 | Imputed   | 0.015192   |           |          |      | 42047860 |          |
| rs58789787  | Imputed   | 0.015205   |           |          |      | 42048069 |          |
| rs75925483  | Imputed   | 0.015201   |           |          |      | 42048595 |          |
| rs17066958  | Imputed   | 0.033432   |           |          |      | 42048961 |          |
| rs73075261  | Imputed   | 0.5014     |           |          |      | 42049207 |          |
| rs73075263  | Imputed   | 0.50104    |           |          |      | 42049386 |          |
|             |           |            | mod073655 | PreMod   | 10   | 42049609 | 42049739 |
|             |           |            | POU3F2    | TransFac | 1.96 | 42049767 | 42049783 |
| rs60842989  | Imputed   | 0.015129   |           |          |      | 42051376 |          |
| rs904269    | Genotyped | 0.45263    |           |          |      | 42051626 |          |
| rs12106811  | Genotyped | 0.371      |           |          |      | 42051974 |          |
| rs12107568  | Imputed   | 0.5673     |           |          |      | 42052126 |          |
|             |           |            | STAT3     | TransFac | 1.96 | 42052495 | 42052503 |
| rs59424237  | Imputed   | 0.015242   |           |          |      | 42052668 |          |
| rs17219472  | Imputed   | 0.014713   |           |          |      | 42053211 |          |
| rs111836559 | Imputed   | 0.0035872  |           |          |      | 42053365 |          |
| rs113737622 | Imputed   | 0.0035904  |           |          |      | 42053372 |          |
| rs9847688   | Genotyped | 0.57068    |           |          |      | 42054115 |          |
| rs112432350 | Imputed   | 0.015452   |           |          |      | 42055100 |          |
| rs112431774 | Imputed   | 0.0043895  |           |          |      | 42055145 |          |
| rs72867930  | Imputed   | 0.0043868  |           |          |      | 42055231 |          |
| rs6599200   | Imputed   | 0.0043717  |           |          |      | 42055929 |          |
| rs76598442  | Imputed   | 0.015391   |           |          |      | 42056457 |          |
| rs112784949 | Imputed   | 0.0043084  |           |          |      | 42058719 |          |
| rs9850297   | Imputed   | 0.015235   |           |          |      | 42059431 |          |
|             |           |            | FAC1      | TransFac | 2.1  | 42059632 | 42059646 |
| rs116626028 | Imputed   | 0.027121   |           |          |      | 42060001 |          |
| rs9836286   | Imputed   | 0.034924   |           |          |      | 42060747 |          |
| rs9836323   | Imputed   | 0.015198   |           |          |      | 42060915 |          |
| rs73828516  | Imputed   | 0.0042988  |           |          |      | 42061576 |          |
| rs114978877 | Imputed   | 0.026878   |           |          |      | 42061755 |          |

|             |           |           |           |          |      |          |          |
|-------------|-----------|-----------|-----------|----------|------|----------|----------|
| rs9842053   | Imputed   | 0.0035678 |           |          |      | 42061966 |          |
| rs77471246  | Imputed   | 0.015161  |           |          |      | 42062092 |          |
| rs1553097   | Imputed   | 0.026768  |           |          |      | 42062328 |          |
| rs76550373  | Imputed   | 0.015158  |           |          |      | 42062379 |          |
| rs61474116  | Imputed   | 0.015077  |           |          |      | 42063679 |          |
| rs55920039  | Imputed   | 0.014908  |           |          |      | 42064012 |          |
| rs9815291   | Imputed   | 0.014002  |           |          |      | 42064370 |          |
| rs1117773   | Imputed   | 0.66377   |           |          |      | 42064911 |          |
| rs73075268  | Imputed   | 0.014792  |           |          |      | 42065203 |          |
| rs1002947   | Imputed   | 0.66287   |           |          |      | 42065248 |          |
| rs975580    | Imputed   | 0.014723  |           |          |      | 42065692 |          |
| rs4298022   | Imputed   | 0.07963   |           |          |      | 42066367 |          |
| rs75016701  | Imputed   | 0.079436  |           |          |      | 42066505 |          |
| rs7636449   | Imputed   | 0.70725   |           |          |      | 42066748 |          |
| rs6791328   | Imputed   | 0.70764   |           |          |      | 42067184 |          |
| rs79917813  | Imputed   | 0.078696  |           |          |      | 42067470 |          |
| rs79237428  | Imputed   | 0.078478  |           |          |      | 42067656 |          |
| rs1498095   | Imputed   | 0.078143  |           |          |      | 42068426 |          |
| rs28759206  | Imputed   | 0.0041918 |           |          |      | 42068459 |          |
| rs1498094   | Imputed   | 0.078097  |           |          |      | 42068756 |          |
| rs41460244  | Imputed   | 0.062179  |           |          |      | 42069173 |          |
| rs77304047  | Imputed   | 0.07781   |           |          |      | 42069312 |          |
| rs78875537  | Imputed   | 0.014864  |           |          |      | 42070290 |          |
| rs28503399  | Imputed   | 0.71344   |           |          |      | 42070313 |          |
| rs78101822  | Imputed   | 0.077191  |           |          |      | 42071137 |          |
| rs80194901  | Imputed   | 0.077346  |           |          |      | 42071187 |          |
| rs9862024   | Imputed   | 0.79329   |           |          |      | 42071245 |          |
| rs78607708  | Imputed   | 0.076927  |           |          |      | 42071959 |          |
| rs76009754  | Imputed   | 0.076724  |           |          |      | 42072326 |          |
| rs75280714  | Imputed   | 0.076613  |           |          |      | 42072507 |          |
| rs61206862  | Imputed   | 0.71747   |           |          |      | 42072745 |          |
| rs60715079  | Imputed   | 0.71764   |           |          |      | 42072936 |          |
|             |           |           | mod073656 | PreMod   | 10   | 42073316 | 42073493 |
|             |           |           | RSRFC4    | TransFac | 2.58 | 42073501 | 42073517 |
|             |           |           | E47       | TransFac | 2.2  | 42073666 | 42073682 |
|             |           |           | AREB6     | TransFac | 1.96 | 42073668 | 42073680 |
|             |           |           | POU2F1    | TransFac | 2.23 | 42073708 | 42073723 |
| rs1874757   | Imputed   | 0.076349  |           |          |      | 42073716 |          |
| rs28514872  | Imputed   | 0.014742  |           |          |      | 42074223 |          |
| rs6782307   | Imputed   | 0.81578   |           |          |      | 42074701 |          |
| rs75930447  | Imputed   | 0.037513  |           |          |      | 42075767 |          |
| rs80042369  | Imputed   | 0.00418   |           |          |      | 42076091 |          |
| rs77341013  | Imputed   | 0.075361  |           |          |      | 42076264 |          |
| rs6762869   | Imputed   | 0.7238    |           |          |      | 42076722 |          |
| rs75878015  | Imputed   | 0.074149  |           |          |      | 42077528 |          |
|             |           |           | mod073657 | PreMod   | 10   | 42078044 | 42078136 |
|             |           |           | RSRFC4    | TransFac | 2.2  | 42078097 | 42078113 |
|             |           |           | LUN-1     | TransFac | 2.08 | 42078113 | 42078130 |
|             |           |           | Arnt      | TransFac | 2.1  | 42078116 | 42078136 |
|             |           |           | SREBP-1a  | TransFac | 2.01 | 42078120 | 42078131 |
| rs76816445  | Imputed   | 0.071942  |           |          |      | 42078829 |          |
| rs59983764  | Imputed   | 0.03724   |           |          |      | 42079483 |          |
| rs75851484  | Imputed   | 0.033117  |           |          |      | 42079686 |          |
| rs56158038  | Imputed   | 0.38803   |           |          |      | 42080213 |          |
| rs4974016   | Genotyped | 0.73347   |           |          |      | 42080679 |          |
| rs112923795 | Imputed   | 0.0055452 |           |          |      | 42081466 |          |
| rs4974015   | Imputed   | 0.67264   |           |          |      | 42081512 |          |
| rs6778412   | Imputed   | 0.67144   |           |          |      | 42082230 |          |
| rs4973903   | Imputed   | 0.67024   |           |          |      | 42082943 |          |
| rs77488722  | Imputed   | 0.032554  |           |          |      | 42082950 |          |
|             |           |           | Elk-1     | TransFac | 2.17 | 42084180 | 42084196 |
| rs114221166 | Imputed   | 0.097385  |           |          |      | 42084300 |          |
| rs1532495   | Imputed   | 0.58153   |           |          |      | 42084328 |          |
| rs11129937  | Imputed   | 0.5181    |           |          |      | 42085098 |          |

|                |           |           |         |          |      |          |          |
|----------------|-----------|-----------|---------|----------|------|----------|----------|
| rs79464572     | Imputed   | 0.032847  |         |          |      | 42085588 |          |
| rs11719429     | Imputed   | 0.55027   |         |          |      | 42085801 |          |
| rs5029848      | Genotyped | 0.54165   |         |          |      | 42085847 |          |
| rs7612179      | Imputed   | 0.55061   |         |          |      | 42086144 |          |
| rs17067692     | Imputed   | 0.034053  |         |          |      | 42087599 |          |
| rs11926615     | Imputed   | 0.55015   |         |          |      | 42088173 |          |
|                |           |           | TBP     | TransFac | 2.31 | 42088964 | 42088979 |
|                |           |           | RSRFC4  | TransFac | 2.59 | 42088966 | 42088982 |
|                |           |           | E4BP4   | TransFac | 3.94 | 42089022 | 42089034 |
|                |           |           | Hlf     | TransFac | 2.02 | 42089023 | 42089033 |
|                |           |           | ATF-2   | TransFac | 3.28 | 42089024 | 42089032 |
| rs7644110      | Genotyped | 0.52507   |         |          |      | 42090492 |          |
| rs77571642     | Imputed   | 0.036013  |         |          |      | 42090580 |          |
| rs74510803     | Imputed   | 0.036031  |         |          |      | 42090596 |          |
| rs17067739     | Imputed   | 0.55043   |         |          |      | 42090785 |          |
| rs78448473     | Imputed   | 0.036028  |         |          |      | 42091188 |          |
| rs9878324      | Imputed   | 0.55233   |         |          |      | 42091441 |          |
| rs9861303      | Imputed   | 0.49414   |         |          |      | 42091761 |          |
| rs2133070      | Imputed   | 0.49906   |         |          |      | 42092488 |          |
| rs11713669     | Imputed   | 0.0062779 |         |          |      | 42093180 |          |
| rs2371970      | Imputed   | 0.50252   |         |          |      | 42093704 |          |
| rs6801363      | Imputed   | 0.56123   |         |          |      | 42094377 |          |
| rs1909116      | Imputed   | 0.46768   |         |          |      | 42094483 |          |
| rs59987266     | Imputed   | 0.57619   |         |          |      | 42095004 |          |
| rs7644706      | Imputed   | 0.47813   |         |          |      | 42095198 |          |
| rs56207348     | Imputed   | 0.56561   |         |          |      | 42095973 |          |
| rs11129938     | Imputed   | 0.50907   |         |          |      | 42096046 |          |
| rs6779231      | Imputed   | 0.53352   |         |          |      | 42096633 |          |
| rs17067875     | Imputed   | 0.55165   |         |          |      | 42097996 |          |
| rs61341025     | Imputed   | 0.0071431 |         |          |      | 42098218 |          |
| rs11928711     | Imputed   | 0.58721   |         |          |      | 42099039 |          |
| rs1466811      | Imputed   | 0.58776   |         |          |      | 42099369 |          |
| rs1466810      | Imputed   | 0.4675    |         |          |      | 42099645 |          |
| rs57946975     | Imputed   | 0.0074748 |         |          |      | 42100375 |          |
| rs952731       | Imputed   | 0.50745   |         |          |      | 42100926 |          |
| rs4974014      | Imputed   | 0.52359   |         |          |      | 42101812 |          |
| rs115594503    | Imputed   | 0.036081  |         |          |      | 42102811 |          |
|                |           |           | AP-2rep | TransFac | 2.36 | 42103690 | 42103697 |
|                |           |           | LUN-1   | TransFac | 2.97 | 42103855 | 42103872 |
| rs11712096     | Imputed   | 0.59954   |         |          |      | 42104112 |          |
| rs2088478      | Imputed   | 0.5457    |         |          |      | 42105999 |          |
| rs1995137      | Genotyped | 0.53039   |         |          |      | 42106419 |          |
| rs1995136      | Imputed   | 0.53628   |         |          |      | 42106505 |          |
| rs2173336      | Genotyped | 0.56086   |         |          |      | 42106738 |          |
| rs2133069      | Imputed   | 0.5241    |         |          |      | 42106833 |          |
| rs4974012      | Imputed   | 0.5396    |         |          |      | 42107043 |          |
| TRAK1_Exon_1   |           |           |         |          |      | 42107750 | 42108056 |
|                |           |           | GATA-3  | TransFac | 2.48 | 42107760 | 42107769 |
|                |           |           | Lmo2    | TransFac | 2.55 | 42107760 | 42107769 |
|                |           |           | E4BP4   | TransFac | 3.65 | 42107785 | 42107797 |
|                |           |           | Hlf     | TransFac | 3.59 | 42107786 | 42107796 |
|                |           |           | ATF-2   | TransFac | 3.28 | 42107787 | 42107795 |
| TRAK1_Intron_1 |           |           |         |          |      | 42108057 | 42141915 |
| rs4974011      | Imputed   | 0.54817   |         |          |      | 42108153 |          |
| rs4538349      | Imputed   | 0.13103   |         |          |      | 42108756 |          |
|                |           |           | POU2F1  | TransFac | 2.59 | 42108989 | 42109001 |
|                |           |           | POU3F2  | TransFac | 2.44 | 42108990 | 42109000 |
| rs9829220      | Imputed   | 0.4798    |         |          |      | 42109182 |          |
| rs11129939     | Imputed   | 0.32358   |         |          |      | 42109259 |          |
| rs7371986      | Imputed   | 0.54283   |         |          |      | 42109998 |          |
| rs113494527    | Imputed   | 0.0088235 |         |          |      | 42110004 |          |
| rs10865915     | Imputed   | 0.64463   |         |          |      | 42111013 |          |
| rs13322238     | Imputed   | 0.58987   |         |          |      | 42111977 |          |
| rs1909115      | Imputed   | 0.59487   |         |          |      | 42112324 |          |

|                |           |          |       |          |      |          |          |
|----------------|-----------|----------|-------|----------|------|----------|----------|
| rs4974010      | Imputed   | 0.53957  |       |          |      | 42112943 |          |
| rs7649478      | Imputed   | 0.51805  |       |          |      | 42113529 |          |
| rs11918064     | Imputed   | 0.53299  |       |          |      | 42113818 |          |
| rs11918098     | Imputed   | 0.5329   |       |          |      | 42113916 |          |
| rs60611904     | Imputed   | 0.49946  |       |          |      | 42114512 |          |
| rs9851708      | Imputed   | 0.49964  |       |          |      | 42114546 |          |
| rs61473607     | Imputed   | 0.53079  |       |          |      | 42114604 |          |
| rs12054017     | Imputed   | 0.53066  |       |          |      | 42114696 |          |
| rs11129940     | Imputed   | 0.5768   |       |          |      | 42114881 |          |
| rs11710716     | Imputed   | 0.57536  |       |          |      | 42115371 |          |
| rs13434127     | Imputed   | 0.57275  |       |          |      | 42116257 |          |
| rs12715376     | Imputed   | 0.40941  |       |          |      | 42116474 |          |
| rs6809665      | Imputed   | 0.52248  |       |          |      | 42117354 |          |
| rs6806570      | Imputed   | 0.043946 |       |          |      | 42118120 |          |
| rs1532496      | Imputed   | 0.47779  |       |          |      | 42118220 |          |
| rs4974009      | Imputed   | 0.52651  |       |          |      | 42119066 |          |
| rs9830266      | Imputed   | 0.6418   |       |          |      | 42119428 |          |
| rs6808207      | Imputed   | 0.64048  |       |          |      | 42119985 |          |
| rs112406027    | Imputed   | 0.009573 |       |          |      | 42120523 |          |
| rs113712414    | Imputed   | 0.082167 |       |          |      | 42120950 |          |
| rs13322778     | Imputed   | 0.046466 |       |          |      | 42121273 |          |
| rs7651006      | Imputed   | 0.70325  |       |          |      | 42123303 |          |
| rs9872115      | Imputed   | 0.61373  |       |          |      | 42123985 |          |
| rs9867570      | Imputed   | 0.65926  |       |          |      | 42126472 |          |
| rs2133068      | Imputed   | 0.4281   |       |          |      | 42127560 |          |
| rs12330868     | Imputed   | 0.65446  |       |          |      | 42128686 |          |
| rs7618392      | Imputed   | 0.018586 |       |          |      | 42128868 |          |
| rs7426457      | Imputed   | 0.4558   |       |          |      | 42129651 |          |
| rs9875626      | Imputed   | 0.45875  |       |          |      | 42129846 |          |
| rs56776002     | Imputed   | 0.63976  |       |          |      | 42129895 |          |
| rs9855913      | Imputed   | 0.45982  |       |          |      | 42129933 |          |
| rs9875966      | Imputed   | 0.63844  |       |          |      | 42130012 |          |
| rs75563240     | Imputed   | 0.019275 |       |          |      | 42130383 |          |
| rs12630954     | Imputed   | 0.46655  |       |          |      | 42130437 |          |
| rs9861726      | Imputed   | 0.52707  |       |          |      | 42131251 |          |
| rs2133076      | Imputed   | 0.61861  |       |          |      | 42131669 |          |
| rs1562690      | Imputed   | 0.52386  |       |          |      | 42131793 |          |
| rs4246669      | Imputed   | 0.52166  |       |          |      | 42131890 |          |
| rs1530735      | Imputed   | 0.61617  |       |          |      | 42131911 |          |
| rs1530736      | Imputed   | 0.61617  |       |          |      | 42131941 |          |
| rs4246668      | Imputed   | 0.48737  |       |          |      | 42131964 |          |
|                |           |          | CREB  | TransFac | 2.41 | 42131976 | 42131991 |
| rs4246667      | Imputed   | 0.48907  |       |          |      | 42132154 |          |
| rs11718948     | Imputed   | 0.020248 |       |          |      | 42133363 |          |
| rs55874108     | Imputed   | 0.49685  |       |          |      | 42133487 |          |
| rs58618631     | Imputed   | 0.49684  |       |          |      | 42133488 |          |
| rs61199298     | Imputed   | 0.012021 |       |          |      | 42133849 |          |
| rs9877516      | Imputed   | 0.020431 |       |          |      | 42134183 |          |
| rs4974008      | Imputed   | 0.59873  |       |          |      | 42134355 |          |
| rs9882102      | Imputed   | 0.08696  |       |          |      | 42134518 |          |
| rs9311294      | Imputed   | 0.60049  |       |          |      | 42134526 |          |
| rs4973902      | Imputed   | 0.59591  |       |          |      | 42135765 |          |
| rs11706587     | Imputed   | 0.012293 |       |          |      | 42136076 |          |
| rs2133075      | Imputed   | 0.5914   |       |          |      | 42138407 |          |
| rs2133074      | Imputed   | 0.59117  |       |          |      | 42138514 |          |
|                |           |          | FAC1  | TransFac | 1.97 | 42138906 | 42138920 |
| rs61666600     | Imputed   | 0.021115 |       |          |      | 42139242 |          |
|                |           |          | Elk-1 | TransFac | 2.48 | 42139518 | 42139534 |
| rs9311295      | Genotyped | 0.61185  |       |          |      | 42141173 |          |
| TRAK1_Exon_2   |           |          |       |          |      | 42141916 | 42142110 |
|                |           |          | E47   | TransFac | 1.99 | 42141966 | 42141981 |
|                |           |          | SRF   | TransFac | 2.86 | 42141998 | 42142016 |
|                |           |          | NCX   | TransFac | 2.11 | 42142108 | 42142118 |
| TRAK1_Intron_2 |           |          |       |          |      | 42142111 | 42193309 |



|             |           |          |        |          |      |          |          |
|-------------|-----------|----------|--------|----------|------|----------|----------|
| rs13323147  | Imputed   | 0.57383  |        |          |      | 42142692 |          |
| rs9858803   | Imputed   | 0.59549  |        |          |      | 42142718 |          |
| rs1375538   | Imputed   | 0.57095  |        |          |      | 42143045 |          |
| rs73828565  | Imputed   | 0.02139  |        |          |      | 42143695 |          |
|             |           |          | NCX    | TransFac | 2.11 | 42144190 | 42144200 |
| rs114149261 | Imputed   | 0.012652 |        |          |      | 42144396 |          |
| rs11711576  | Imputed   | 0.021548 |        |          |      | 42145669 |          |
|             |           |          | FOXD1  | TransFac | 2.21 | 42145676 | 42145692 |
|             |           |          | FOXF2  | TransFac | 2.28 | 42145676 | 42145692 |
|             |           |          | FOXC1  | TransFac | 2.48 | 42145676 | 42145692 |
| rs13071805  | Imputed   | 0.56433  |        |          |      | 42146393 |          |
| rs79456016  | Imputed   | 0.068157 |        |          |      | 42146887 |          |
| rs73828569  | Imputed   | 0.021611 |        |          |      | 42147540 |          |
| rs9311296   | Imputed   | 0.47606  |        |          |      | 42148251 |          |
| rs73066375  | Imputed   | 0.58358  |        |          |      | 42148951 |          |
| rs73066377  | Imputed   | 0.64618  |        |          |      | 42149152 |          |
| rs4973901   | Imputed   | 0.66409  |        |          |      | 42149505 |          |
| rs11720471  | Imputed   | 0.0217   |        |          |      | 42150011 |          |
| rs2371796   | Imputed   | 0.65284  |        |          |      | 42150021 |          |
| rs2371797   | Imputed   | 0.65321  |        |          |      | 42150103 |          |
| rs66990248  | Imputed   | 0.61709  |        |          |      | 42150891 |          |
| rs112740014 | Imputed   | 0.012848 |        |          |      | 42150983 |          |
| rs9682203   | Imputed   | 0.4563   |        |          |      | 42151191 |          |
| rs17220629  | Imputed   | 0.6272   |        |          |      | 42152184 |          |
| rs1979789   | Genotyped | 0.71894  |        |          |      | 42152411 |          |
| rs79562303  | Imputed   | 0.021764 |        |          |      | 42152494 |          |
| rs11709083  | Imputed   | 0.67171  |        |          |      | 42153465 |          |
| rs2133072   | Imputed   | 0.67176  |        |          |      | 42153763 |          |
| rs2133073   | Imputed   | 0.67124  |        |          |      | 42153902 |          |
| rs11709411  | Imputed   | 0.44933  |        |          |      | 42154330 |          |
| rs11129941  | Imputed   | 0.021652 |        |          |      | 42154683 |          |
| rs9311297   | Imputed   | 0.67119  |        |          |      | 42154874 |          |
| rs113540515 | Imputed   | 0.021648 |        |          |      | 42155241 |          |
| rs28435580  | Imputed   | 0.44901  |        |          |      | 42155372 |          |
| rs4974007   | Imputed   | 0.67078  |        |          |      | 42155450 |          |
| rs2055285   | Imputed   | 0.671    |        |          |      | 42155655 |          |
| rs77057253  | Imputed   | 0.021653 |        |          |      | 42155697 |          |
| rs1874756   | Imputed   | 0.67104  |        |          |      | 42156043 |          |
|             |           |          | Cdc5   | TransFac | 3    | 42156237 | 42156249 |
|             |           |          | Meis-1 | TransFac | 2.06 | 42156293 | 42156305 |
|             |           |          | TGIF   | TransFac | 2.62 | 42156293 | 42156304 |
| rs11129942  | Imputed   | 0.43528  |        |          |      | 42156400 |          |
| rs9311298   | Imputed   | 0.449    |        |          |      | 42158457 |          |
| rs113397734 | Imputed   | 0.021523 |        |          |      | 42158567 |          |
| rs9851827   | Imputed   | 0.70864  |        |          |      | 42158696 |          |
| rs9852262   | Imputed   | 0.66931  |        |          |      | 42158780 |          |
| rs9852329   | Imputed   | 0.44944  |        |          |      | 42159005 |          |
| rs9872588   | Genotyped | 0.015307 |        |          |      | 42159177 |          |

## 2p23.3 (rs6746082)

| Gene region     | rsID              | SNP type       | P-value         | TF type   | Source   | Score | Chrom start     | Chrom end |
|-----------------|-------------------|----------------|-----------------|-----------|----------|-------|-----------------|-----------|
|                 | rs10196664        | Genotyped      | 0.56557         |           |          |       | 25442970        |           |
|                 | rs34003498        | Imputed        | 0.11453         |           |          |       | 25444536        |           |
|                 |                   |                |                 | TBP       | TransFac | 2.08  | 25445030        | 25445040  |
|                 |                   |                |                 | mod056867 | PreMod   | 13    | 25445033        | 25445143  |
|                 |                   |                |                 | FOXC1     | TransFac | 2.22  | 25445057        | 25445073  |
|                 |                   |                |                 | CREB      | TransFac | 2.03  | 25445205        | 25445217  |
|                 |                   |                |                 | ATF-2     | TransFac | 2.21  | 25445205        | 25445217  |
|                 |                   |                |                 | ZID       | TransFac | 2.27  | 25445686        | 25445699  |
|                 |                   |                |                 | AP-2rep   | TransFac | 2.36  | 25446291        | 25446298  |
|                 |                   |                |                 | E47       | TransFac | 2.05  | 25446586        | 25446602  |
|                 |                   |                |                 | mod056868 | PreMod   | 11    | 25448348        | 25448517  |
|                 |                   |                |                 | CUTL1     | TransFac | 1.99  | 25448372        | 25448382  |
|                 |                   |                |                 | Lmo2      | TransFac | 2.01  | 25448508        | 25448517  |
|                 | rs1010658         | Genotyped      | 4.72E-05        |           |          |       | 25448698        |           |
|                 | rs1010659         | Imputed        | 3.83E-05        |           |          |       | 25448901        |           |
|                 | rs11126026        | Imputed        | 0.026458        |           |          |       | 25449565        |           |
|                 | rs11126027        | Imputed        | 6.18E-06        |           |          |       | 25449648        |           |
|                 | rs7586928         | Imputed        | 6.07E-06        |           |          |       | 25449826        |           |
|                 | rs732075          | Imputed        | 6.00E-06        |           |          |       | 25449935        |           |
|                 | rs732076          | Imputed        | 5.95E-06        |           |          |       | 25450013        |           |
|                 | rs732077          | Imputed        | 0.002181        |           |          |       | 25450236        |           |
|                 | rs62131105        | Imputed        | 0.55008         |           |          |       | 25450325        |           |
|                 | rs730072          | Genotyped      | 0.71492         |           |          |       | 25451185        |           |
|                 | rs1550118         | Imputed        | 0.3058          |           |          |       | 25451489        |           |
|                 | rs1550119         | Imputed        | 0.70269         |           |          |       | 25451492        |           |
|                 | rs744976          | Imputed        | 0.69883         |           |          |       | 25451922        |           |
|                 |                   |                |                 | AP-4      | TransFac | 2.66  | 25453056        | 25453074  |
|                 |                   |                |                 | TBP       | TransFac | 2.21  | 25453091        | 25453106  |
|                 |                   |                |                 | TBP       | TransFac | 2.14  | 25453101        | 25453109  |
|                 |                   |                |                 | TBP       | TransFac | 2.14  | 25453107        | 25453115  |
|                 |                   |                |                 | RSRFC4    | TransFac | 2.86  | 25453124        | 25453140  |
|                 |                   |                |                 | SREBP-1a  | TransFac | 2.01  | 25453194        | 25453205  |
|                 |                   |                |                 | NRSF      | TransFac | 2.19  | 25453424        | 25453445  |
| DTNB_ Exon_21   |                   |                |                 |           |          |       | 25453616        | 25453926  |
|                 |                   |                |                 | MZF-1     | TransFac | 2.01  | 25453757        | 25453765  |
|                 |                   |                |                 | AREB6     | TransFac | 2.74  | 25453829        | 25453841  |
| DTNB_ Intron_20 |                   |                |                 |           |          |       | 25453927        | 25455662  |
|                 | rs2304426         | Imputed        | 0.00077728      |           |          |       | 25455646        |           |
|                 |                   |                |                 | AREB6     | TransFac | 2.98  | 25455655        | 25455668  |
| DTNB_ Exon_20   |                   |                |                 |           |          |       | 25455663        | 25455696  |
| DTNB_ Intron_19 |                   |                |                 |           |          |       | 25455697        | 25460208  |
|                 |                   |                |                 | c-Rel     | TransFac | 2.85  | 25455768        | 25455778  |
|                 | rs2304427         | Genotyped      | 0.0045196       |           |          |       | 25455814        |           |
|                 | rs2304428         | Imputed        | 0.0045713       |           |          |       | 25455954        |           |
|                 |                   |                |                 | FOXL1     | TransFac | 2.77  | 25456564        | 25456580  |
|                 | rs12986453        | Imputed        | 0.0090515       |           |          |       | 25458341        |           |
|                 | <b>rs55924491</b> | <b>Imputed</b> | <b>1.28E-07</b> |           |          |       | <b>25458527</b> |           |
|                 | rs35010208        | Imputed        | 0.0035635       |           |          |       | 25459476        |           |
|                 | rs10205701        | Imputed        | 0.0052952       |           |          |       | 25459799        |           |
| DTNB_ Exon_19   |                   |                |                 |           |          |       | 25460209        | 25460262  |
| DTNB_ Intron_18 |                   |                |                 |           |          |       | 25460263        | 25463661  |
|                 | <b>rs6761076</b>  | <b>Imputed</b> | <b>1.81E-07</b> |           |          |       | <b>25461262</b> |           |
|                 |                   |                |                 | AREB6     | TransFac | 2.15  | 25463156        | 25463168  |
| DTNB_ Exon_18   |                   |                |                 |           |          |       | 25463662        | 25463751  |
|                 |                   |                |                 | XBP-1     | TransFac | 2.23  | 25463682        | 25463699  |
|                 |                   |                |                 | ZID       | TransFac | 2.48  | 25463698        | 25463711  |
|                 |                   |                |                 | AP-1      | TransFac | 2.06  | 25463701        | 25463714  |
|                 |                   |                |                 | AREB6     | TransFac | 2.31  | 25463744        | 25463757  |
| DTNB_ Intron_17 |                   |                |                 |           |          |       | 25463752        | 25464574  |

|                |           |            |           |          |          |          |          |
|----------------|-----------|------------|-----------|----------|----------|----------|----------|
| DTNB_Exon_17   |           |            |           | 25464575 | 25464734 |          |          |
| DTNB_Intron_16 |           |            |           | 25464735 | 25495887 |          |          |
| rs62131107     | Imputed   | 0.00011494 |           | 25466229 |          |          |          |
| rs7558082      | Imputed   | 5.39E-07   |           | 25466318 |          |          |          |
| rs7577599      | Genotyped | 2.96E-07   |           | 25466650 |          |          |          |
| rs1865693      | Imputed   | 0.00012096 |           | 25473981 |          |          |          |
| rs17046986     | Imputed   | 0.0001217  |           | 25474404 |          |          |          |
| rs7571570      | Genotyped | 0.000147   |           | 25475034 |          |          |          |
| rs6724910      | Imputed   | 0.00011158 |           | 25475943 |          |          |          |
| rs1369704      | Imputed   | 7.30E-05   |           | 25477094 |          |          |          |
| rs2384232      | Genotyped | 8.85E-05   |           | 25477253 |          |          |          |
| rs10206012     | Imputed   | 6.97E-05   |           | 25477690 |          |          |          |
|                |           |            | CUTL1     | TransFac | 2.03     | 25478056 | 25478071 |
|                |           |            | AP-1      | TransFac | 2.79     | 25478218 | 25478227 |
|                |           |            | mod056869 | PreMod   | 11       | 25478227 | 25478352 |
|                |           |            | E47       | TransFac | 2.37     | 25478239 | 25478255 |
|                |           |            | ITF-2     | TransFac | 3.09     | 25478239 | 25478255 |
|                |           |            | POU2F1    | TransFac | 2.33     | 25478284 | 25478296 |
| rs6546148      | Imputed   | 6.87E-05   |           | 25478509 |          |          |          |
| rs7583617      | Imputed   | 9.58E-05   |           | 25479363 |          |          |          |
| rs7570164      | Imputed   | 6.75E-05   |           | 25479740 |          |          |          |
| rs7586918      | Genotyped | 8.78E-05   |           | 25479889 |          |          |          |
| rs12622767     | Imputed   | 7.74E-06   |           | 25481420 |          |          |          |
| rs6756177      | Imputed   | 3.24E-05   |           | 25482401 |          |          |          |
| rs6546149      | Imputed   | 2.24E-05   |           | 25482942 |          |          |          |
| rs60462983     | Imputed   | 5.26E-06   |           | 25483029 |          |          |          |
| rs10180663     | Genotyped | 1.10E-05   |           | 25486746 |          |          |          |
| rs10189164     | Imputed   | 0.000492   |           | 25486872 |          |          |          |
| rs34234907     | Imputed   | 0.034376   |           | 25487740 |          |          |          |
| rs6731296      | Imputed   | 5.87E-05   |           | 25488331 |          |          |          |
| rs35602018     | Imputed   | 0.011966   |           | 25488768 |          |          |          |
| rs35065219     | Imputed   | 0.0018999  |           | 25488962 |          |          |          |
| rs34845373     | Imputed   | 0.01125    |           | 25489275 |          |          |          |
| rs13013139     | Imputed   | 0.059091   |           | 25491609 |          |          |          |
| rs12987881     | Imputed   | 0.0019359  |           | 25491912 |          |          |          |
|                |           |            | ARP-1     | TransFac | 2.14     | 25492446 | 25492462 |
| rs59861869     | Imputed   | 0.0010691  |           | 25493177 |          |          |          |
| rs71439176     | Imputed   | 0.0019642  |           | 25494932 |          |          |          |
|                |           |            | Nkx6-1    | TransFac | 1.98     | 25495557 | 25495570 |
|                |           |            | POU2F1    | TransFac | 2.36     | 25495597 | 25495620 |
|                |           |            | FOXD1     | TransFac | 2.41     | 25495701 | 25495717 |
|                |           |            | FOXF2     | TransFac | 2.84     | 25495701 | 25495717 |
| rs17745893     | Imputed   | 0.045507   |           | 25495798 |          |          |          |
| DTNB_Exon_16   |           |            |           | 25495888 | 25495908 |          |          |
| DTNB_Intron_15 |           |            |           | 25495909 | 25503907 |          |          |
|                |           |            | Sox9      | TransFac | 2        | 25496041 | 25496055 |
|                |           |            | SREBP-1a  | TransFac | 1.98     | 25496380 | 25496391 |
| rs17802463     | Imputed   | 0.023099   |           | 25496725 |          |          |          |
| rs70947889     | Imputed   | 0.014929   |           | 25496897 |          |          |          |
| rs112612430    | Imputed   | 0.014933   |           | 25496901 |          |          |          |
| rs10194144     | Imputed   | 0.25289    |           | 25497036 |          |          |          |
| rs17745923     | Genotyped | 0.025755   |           | 25497448 |          |          |          |
| rs34104763     | Imputed   | 0.023128   |           | 25497703 |          |          |          |
| rs12472283     | Imputed   | 0.0231     |           | 25498047 |          |          |          |
| rs34666683     | Imputed   | 0.034438   |           | 25498441 |          |          |          |
| rs4389287      | Imputed   | 9.25E-05   |           | 25499393 |          |          |          |
| rs77188277     | Imputed   | 0.032786   |           | 25499545 |          |          |          |
| rs13032262     | Imputed   | 0.059719   |           | 25499825 |          |          |          |
| rs12470950     | Imputed   | 0.032788   |           | 25500194 |          |          |          |
| rs6722782      | Imputed   | 0.023963   |           | 25501181 |          |          |          |
| rs80213147     | Imputed   | 0.095948   |           | 25501266 |          |          |          |
| rs36028066     | Imputed   | 0.023161   |           | 25502168 |          |          |          |
| rs78024702     | Imputed   | 0.095758   |           | 25502398 |          |          |          |
| rs13025966     | Imputed   | 0.0231     |           | 25502680 |          |          |          |

|                   |                  |                 |         |                 |                 |
|-------------------|------------------|-----------------|---------|-----------------|-----------------|
| DTNB_Exon_15      |                  |                 |         | 25503908        | 25504004        |
| DTNB_Intron_14    |                  |                 |         | 25504005        | 25509258        |
| rs34648410        | Imputed          | 0.022017        |         | 25504135        |                 |
| rs34736805        | Imputed          | 0.031652        |         | 25504377        |                 |
| rs13430973        | Imputed          | 0.68625         |         | 25506911        |                 |
| rs10198073        | Imputed          | 0.095172        |         | 25507324        |                 |
| rs7605235         | Imputed          | 0.030236        |         | 25507553        |                 |
|                   |                  |                 | Pbx1a   | TransFac        | 2.27            |
|                   |                  |                 | CUTL1   | TransFac        | 2.51            |
| rs11126052        | Imputed          | 0.017179        |         | 25508364        | 25508373        |
| rs2292225         | Genotyped        | 0.0069348       |         | 25508364        | 25508379        |
|                   |                  |                 |         | 25508895        |                 |
|                   |                  |                 |         | 25508950        |                 |
| DTNB_Exon_14      |                  |                 |         | 25509259        | 25509372        |
| rs7583475         | Genotyped        | 0.0047456       |         | 25509276        |                 |
|                   |                  |                 | Pax-5   | TransFac        | 2.03            |
| DTNB_Intron_13    |                  |                 |         | 25509295        | 25509323        |
| rs10495752        | Imputed          | 0.044491        |         | 25509373        | 25510282        |
|                   |                  |                 |         | 25509652        |                 |
| DTNB_Exon_13      |                  |                 |         | 25510283        | 25510368        |
|                   |                  |                 | FOXO4   | TransFac        | 1.97            |
|                   |                  |                 | FOXI1   | TransFac        | 2.18            |
|                   |                  |                 | AP-2rep | TransFac        | 2.36            |
|                   |                  |                 |         | 25510352        | 25510359        |
| DTNB_Intron_12    |                  |                 |         | 25510369        | 25527920        |
|                   |                  |                 | MZF-1   | TransFac        | 2.2             |
| rs1395949         | Imputed          | 0.78229         |         | 25510372        | 25510380        |
| rs11126053        | Imputed          | 0.0074606       |         | 25510384        |                 |
| rs12996921        | Imputed          | 0.0079423       |         | 25510906        |                 |
| rs6755057         | Imputed          | 0.80025         |         | 25511414        |                 |
| rs10865350        | Imputed          | 0.85231         |         | 25511602        |                 |
| rs2384234         | Genotyped        | 0.067533        |         | 25511888        |                 |
| rs114859667       | Imputed          | 2.44E-06        |         | 25512312        |                 |
| <b>rs6746082</b>  | <b>Genotyped</b> | <b>2.68E-07</b> |         | <b>25512748</b> |                 |
| rs4499386         | Imputed          | 0.81463         |         | 25512717        |                 |
| rs4302184         | Imputed          | 0.3052          |         | 25513528        |                 |
| rs7589394         | Imputed          | 4.65E-07        |         | 25513855        |                 |
| rs55758232        | Imputed          | 0.042895        |         | 25515248        |                 |
| rs10210057        | Genotyped        | 0.32776         |         | 25515334        |                 |
|                   |                  |                 |         | 25516082        |                 |
|                   |                  |                 | Oct-B1  | TransFac        | 2.37            |
|                   |                  |                 | POU2F1  | TransFac        | 2.05            |
| rs1006752         | Genotyped        | 7.10E-06        |         | 25516898        | 25516911        |
|                   |                  |                 |         | 25517090        | 25517109        |
|                   |                  |                 |         | 25517495        |                 |
|                   |                  |                 | TGIF    | TransFac        | 2.38            |
| <b>rs2036653</b>  | <b>Imputed</b>   | <b>2.57E-07</b> |         | <b>25517862</b> | <b>25517873</b> |
| rs34825449        | Imputed          | 0.010281        |         | 25520473        |                 |
|                   |                  |                 |         | 25520623        |                 |
|                   |                  |                 | FOXO4   | TransFac        | 2.36            |
|                   |                  |                 | RSRFC4  | TransFac        | 2.66            |
|                   |                  |                 | TBP     | TransFac        | 2.14            |
|                   |                  |                 | Oct-B1  | TransFac        | 2.33            |
| rs6546181         | Genotyped        | 0.78388         |         | 25521155        | 25520953        |
|                   |                  |                 |         | 25521159        | 25521171        |
|                   |                  |                 |         | 25521192        | 25521205        |
|                   |                  |                 |         | 2552196         |                 |
|                   |                  |                 | HSF1    | TransFac        | 2               |
| rs6721434         | Imputed          | 0.26752         |         | 25522557        | 25522567        |
| rs6712045         | Imputed          | 2.90E-06        |         | 25523021        |                 |
| <b>rs13390436</b> | <b>Imputed</b>   | <b>2.28E-07</b> |         | <b>25523477</b> |                 |
| rs7566839         | Imputed          | 0.70099         |         | 25524281        |                 |
| rs62128541        | Imputed          | 0.65472         |         | 25524317        |                 |
| rs34296691        | Imputed          | 0.041439        |         | 25524343        |                 |
| rs6546183         | Genotyped        | 4.87E-07        |         | 25524722        |                 |
| rs56131005        | Imputed          | 0.012496        |         | 25525310        |                 |
| rs6546184         | Imputed          | 2.84E-07        |         | 25525639        |                 |
| rs13397493        | Imputed          | 2.86E-07        |         | 25525973        |                 |
| rs79507366        | Imputed          | 0.31506         |         | 25526196        |                 |
|                   |                  |                 |         | 25526626        |                 |
|                   |                  |                 | Oct-B1  | TransFac        | 2.25            |
| DTNB_Exon_12      |                  |                 |         | 25527857        | 25527870        |
| DTNB_Intron_11    |                  |                 |         | 25527921        | 25528008        |
| rs10495753        | Genotyped        | 0.23942         |         | 25528009        | 25531777        |
| rs1122350         | Imputed          | 0.073216        |         | 25529199        |                 |
| rs6715574         | Imputed          | 0.29238         |         | 25529216        |                 |
|                   |                  |                 |         | 25530249        |                 |

|                |             |           |            |        |          |      |          |          |
|----------------|-------------|-----------|------------|--------|----------|------|----------|----------|
|                | rs6758432   | Imputed   | 0.009557   |        |          |      | 25530487 |          |
|                | rs6733060   | Imputed   | 3.54E-06   |        |          |      | 25531501 |          |
| DTNB_Exon_11   |             |           |            |        |          |      | 25531778 | 25531867 |
|                |             |           |            | MIF-1  | TransFac | 2.24 | 25531859 | 25531877 |
| DTNB_Intron_10 |             |           |            |        |          |      | 25531868 | 25559168 |
|                | rs79890247  | Imputed   | 0.27421    |        |          |      | 25532439 |          |
|                | rs7563976   | Imputed   | 0.11811    |        |          |      | 25533100 |          |
|                | rs4665293   | Imputed   | 0.12117    |        |          |      | 25534183 |          |
|                | rs113288889 | Imputed   | 6.91E-06   |        |          |      | 25535056 |          |
|                | rs13387987  | Imputed   | 3.11E-07   |        |          |      | 25535920 |          |
|                | rs6546199   | Genotyped | 0.18624    |        |          |      | 25536951 |          |
|                | rs111796678 | Imputed   | 0.19019    |        |          |      | 25537275 |          |
|                | rs2384235   | Imputed   | 0.15338    |        |          |      | 25537622 |          |
|                | rs6546201   | Imputed   | 0.16649    |        |          |      | 25539937 |          |
|                | rs34466502  | Imputed   | 0.0099445  |        |          |      | 25545169 |          |
|                | rs13386804  | Imputed   | 0.14226    |        |          |      | 25545616 |          |
|                | rs6546204   | Imputed   | 0.16401    |        |          |      | 25546774 |          |
|                |             |           |            | POU2F1 | TransFac | 2.22 | 25549997 | 25550020 |
|                |             |           |            | POU2F1 | TransFac | 2.4  | 25550629 | 25550641 |
|                |             |           |            | POU3F2 | TransFac | 2.13 | 25550630 | 25550640 |
|                | rs6737282   | Imputed   | 0.16241    |        |          |      | 25550907 |          |
|                | rs6740340   | Imputed   | 0.025078   |        |          |      | 25550937 |          |
|                | rs62128545  | Imputed   | 0.029347   |        |          |      | 25551685 |          |
|                | rs4665791   | Imputed   | 2.58E-06   |        |          |      | 25552351 |          |
|                | rs504855    | Imputed   | 0.18937    |        |          |      | 25553938 |          |
|                | rs559802    | Imputed   | 0.16056    |        |          |      | 25555416 |          |
|                | rs34311155  | Imputed   | 0.012638   |        |          |      | 25555559 |          |
|                |             |           |            | CUTL1  | TransFac | 2.56 | 25556441 | 25556453 |
|                |             |           |            | Pbx1a  | TransFac | 2.21 | 25558102 | 25558117 |
|                | rs6751254   | Genotyped | 0.026562   |        |          |      | 25558932 |          |
| DTNB_Exon_10   |             |           |            |        |          |      | 25559169 | 25559246 |
|                |             |           |            | MZF-1  | TransFac | 2.21 | 25559234 | 25559247 |
| DTNB_Intron_9  |             |           |            |        |          |      | 25559247 | 25607845 |
|                |             |           |            | IRF-7A | TransFac | 2.24 | 25560998 | 25561016 |
|                |             |           |            | Elk-1  | TransFac | 2.29 | 25561167 | 25561183 |
|                | rs79386975  | Imputed   | 0.017856   |        |          |      | 25561184 |          |
|                |             |           |            | POU2F1 | TransFac | 2    | 25561219 | 25561238 |
|                |             |           |            | POU3F2 | TransFac | 2.03 | 25561223 | 25561233 |
|                |             |           |            | CUTL1  | TransFac | 2.41 | 25561244 | 25561259 |
|                |             |           |            | TBP    | TransFac | 2.04 | 25561322 | 25561330 |
|                | rs2055718   | Imputed   | 0.13023    |        |          |      | 25563594 |          |
|                | rs9917341   | Imputed   | 0.014535   |        |          |      | 25566429 |          |
|                | rs603235    | Imputed   | 0.14293    |        |          |      | 25567501 |          |
|                |             |           |            | AP-1   | TransFac | 2.67 | 25567845 | 25567858 |
|                | rs1507705   | Genotyped | 0.00060287 |        |          |      | 25568420 |          |
|                |             |           |            | Sox9   | TransFac | 2.47 | 25568768 | 25568782 |
|                | rs7577573   | Imputed   | 7.31E-06   |        |          |      | 25570101 |          |
|                | rs679112    | Imputed   | 7.23E-06   |        |          |      | 25571556 |          |
|                |             |           |            | Nkx6-1 | TransFac | 2.08 | 25572514 | 25572527 |
|                |             |           |            | FOXD1  | TransFac | 2.14 | 25573297 | 25573313 |
|                | rs72851462  | Imputed   | 0.0017936  |        |          |      | 25576542 |          |
|                | rs6728820   | Imputed   | 0.00012141 |        |          |      | 25578390 |          |
|                | rs6725828   | Imputed   | 8.46E-05   |        |          |      | 25578561 |          |
|                | rs545065    | Imputed   | 0.0003734  |        |          |      | 25579627 |          |
|                | rs9309386   | Genotyped | 0.87524    |        |          |      | 25581414 |          |
|                | rs10495754  | Genotyped | 0.81226    |        |          |      | 25581791 |          |
|                | rs551405    | Imputed   | 0.00015641 |        |          |      | 25582511 |          |
|                | rs67442259  | Imputed   | 0.22699    |        |          |      | 25583194 |          |
|                | rs1965239   | Imputed   | 0.00015235 |        |          |      | 25583225 |          |
|                | rs671826    | Imputed   | 0.00015419 |        |          |      | 25583573 |          |
|                | rs683662    | Imputed   | 0.00015339 |        |          |      | 25583848 |          |
|                | rs517506    | Imputed   | 0.00015331 |        |          |      | 25583908 |          |
|                | rs517403    | Genotyped | 0.00015059 |        |          |      | 25583943 |          |
|                | rs685899    | Imputed   | 0.00015351 |        |          |      | 25584344 |          |

|               |           |            |        |          |      |          |          |
|---------------|-----------|------------|--------|----------|------|----------|----------|
| rs2384237     | Imputed   | 0.00031659 |        |          |      | 25584893 |          |
| rs2384238     | Imputed   | 0.0003166  |        |          |      | 25584917 |          |
| rs503169      | Imputed   | 0.00015428 |        |          |      | 25588576 |          |
| rs519177      | Imputed   | 0.0001671  |        |          |      | 25590545 |          |
| rs3100635     | Imputed   | 0.033214   |        |          |      | 25593289 |          |
| rs596173      | Imputed   | 0.00060355 |        |          |      | 25594495 |          |
| rs499728      | Genotyped | 0.10446    |        |          |      | 25594525 |          |
| rs498963      | Imputed   | 0.00060561 |        |          |      | 25594565 |          |
| rs78399652    | Imputed   | 0.087276   |        |          |      | 25594676 |          |
| rs670343      | Imputed   | 0.00065533 |        |          |      | 25598235 |          |
|               |           |            | FOXD1  | TransFac | 2.04 | 25598606 | 25598622 |
|               |           |            | FOXO4  | TransFac | 2.91 | 25598606 | 25598620 |
| rs13388279    | Imputed   | 0.90859    |        |          |      | 25599230 |          |
| rs6546237     | Imputed   | 0.00032507 |        |          |      | 25602880 |          |
| rs1848307     | Imputed   | 0.00074384 |        |          |      | 25605685 |          |
| rs624622      | Imputed   | 0.00078526 |        |          |      | 25606483 |          |
| rs537986      | Imputed   | 0.00079177 |        |          |      | 25607509 |          |
| rs539879      | Imputed   | 0.00077395 |        |          |      | 25607739 |          |
|               |           |            | Nkx3-1 | TransFac | 2.43 | 25607835 | 25607847 |
| DTNB_Exon_9   |           |            |        |          |      | 25607846 | 25607970 |
| DTNB_Intron_8 |           |            |        |          |      | 25607971 | 25653210 |
| rs636586      | Imputed   | 0.00078313 |        |          |      | 25608174 |          |
| rs6731902     | Imputed   | 0.00082546 |        |          |      | 25608704 |          |
|               |           |            | POU2F1 | TransFac | 2    | 25608729 | 25608744 |
| rs936012      | Genotyped | 0.00071895 |        |          |      | 25609352 |          |
| rs114815360   | Imputed   | 0.00084054 |        |          |      | 25609686 |          |
| rs483490      | Imputed   | 0.00080705 |        |          |      | 25609768 |          |
| rs11691124    | Imputed   | 0.96408    |        |          |      | 25610356 |          |
| rs13424814    | Imputed   | 0.96395    |        |          |      | 25610384 |          |
| rs3100636     | Imputed   | 0.00084503 |        |          |      | 25610584 |          |
| rs3105720     | Imputed   | 0.00084508 |        |          |      | 25610595 |          |
| rs682888      | Imputed   | 0.00085689 |        |          |      | 25611213 |          |
| rs503594      | Imputed   | 0.00085739 |        |          |      | 25611307 |          |
| rs500864      | Imputed   | 0.0036869  |        |          |      | 25611601 |          |
| rs670576      | Imputed   | 0.00085874 |        |          |      | 25611636 |          |
| rs80307750    | Imputed   | 0.00086187 |        |          |      | 25612181 |          |
| rs116678762   | Imputed   | 0.075914   |        |          |      | 25612284 |          |
| rs111628494   | Imputed   | 0.00089065 |        |          |      | 25612478 |          |
| rs476731      | Genotyped | 0.0013842  |        |          |      | 25613417 |          |
| rs637519      | Imputed   | 0.0007974  |        |          |      | 25614395 |          |
| rs508262      | Imputed   | 0.00086617 |        |          |      | 25614548 |          |
| rs840001      | Imputed   | 0.00071909 |        |          |      | 25617094 |          |
| rs2034717     | Imputed   | 0.036239   |        |          |      | 25619983 |          |
|               |           |            | Meis-1 | TransFac | 2.1  | 25620780 | 25620792 |
| rs486217      | Imputed   | 0.00080009 |        |          |      | 25621065 |          |
| rs659323      | Imputed   | 0.0008346  |        |          |      | 25624883 |          |
| rs658414      | Imputed   | 0.00077469 |        |          |      | 25625065 |          |
| rs34040118    | Imputed   | 0.036003   |        |          |      | 25626580 |          |
| rs6713224     | Imputed   | 0.017736   |        |          |      | 25629216 |          |
| rs478237      | Imputed   | 0.00083616 |        |          |      | 25629389 |          |
| rs12612999    | Imputed   | 0.042671   |        |          |      | 25629465 |          |
|               |           |            | POU3F2 | TransFac | 2.38 | 25629766 | 25629776 |
|               |           |            | Nkx6-1 | TransFac | 2.08 | 25630150 | 25630163 |
| rs35062477    | Imputed   | 0.00082518 |        |          |      | 25631683 |          |
| rs12473635    | Imputed   | 0.00082179 |        |          |      | 25632141 |          |
| rs115996825   | Imputed   | 0.020399   |        |          |      | 25632565 |          |
| rs61712781    | Imputed   | 0.00082011 |        |          |      | 25632999 |          |
|               |           |            | ITF-2  | TransFac | 2.05 | 25634772 | 25634788 |
| rs6737159     | Imputed   | 0.00081565 |        |          |      | 25634957 |          |
|               |           |            | NCX    | TransFac | 2.01 | 25635067 | 25635077 |
| rs2891464     | Imputed   | 0.88764    |        |          |      | 25638173 |          |
| rs6722545     | Imputed   | 0.00066944 |        |          |      | 25639403 |          |
| rs4665793     | Imputed   | 0.89772    |        |          |      | 25640673 |          |
| rs2123825     | Imputed   | 0.0037212  |        |          |      | 25641814 |          |

|               |            |           |          |          |          |      |  |          |          |
|---------------|------------|-----------|----------|----------|----------|------|--|----------|----------|
|               | rs2123826  | Imputed   | 7.86E-05 |          |          |      |  | 25642648 |          |
|               |            |           |          | FOXI1    | TransFac | 2.04 |  | 25643870 | 25643883 |
|               |            |           |          | TBP      | TransFac | 2.27 |  | 25643911 | 25643926 |
|               | rs80258673 | Imputed   | 0.068477 |          |          |      |  | 25645789 |          |
|               |            |           |          | Cdc5     | TransFac | 2.76 |  | 25650221 | 25650233 |
|               | rs2384252  | Imputed   | 0.6707   |          |          |      |  | 25651616 |          |
| DTNB_Exon_8   |            |           |          |          |          |      |  | 25653211 | 25653377 |
|               |            |           |          | ATF6     | TransFac | 2.09 |  | 25653265 | 25653273 |
| DTNB_Intron_7 |            |           |          |          |          |      |  | 25653378 | 25657093 |
|               |            |           |          | POU3F2   | TransFac | 3.1  |  | 25654834 | 25654844 |
|               |            |           |          | TBP      | TransFac | 2.72 |  | 25655575 | 25655590 |
| DTNB_Exon_7   |            |           |          |          |          |      |  | 25657094 | 25657199 |
|               |            |           |          | SRF      | TransFac | 2    |  | 25657126 | 25657141 |
|               |            |           |          | Cart-1   | TransFac | 2.65 |  | 25657177 | 25657195 |
| DTNB_Intron_6 |            |           |          |          |          |      |  | 25657200 | 25672458 |
|               | rs35921400 | Imputed   | 0.036215 |          |          |      |  | 25660515 |          |
|               | rs11126114 | Genotyped | 0.67515  |          |          |      |  | 25660610 |          |
|               |            |           |          | POU3F2   | TransFac | 2.2  |  | 25664229 | 25664245 |
|               |            |           |          | STAT3    | TransFac | 2.12 |  | 25665127 | 25665148 |
| DTNB_Exon_6   |            |           |          |          |          |      |  | 25672459 | 25672613 |
|               |            |           |          | ITF-2    | TransFac | 1.99 |  | 25672515 | 25672531 |
| DTNB_Intron_5 |            |           |          |          |          |      |  | 25672614 | 25683608 |
|               | rs10185746 | Imputed   | 0.88609  |          |          |      |  | 25674168 |          |
|               | rs1377780  | Genotyped | 0.98293  |          |          |      |  | 25675193 |          |
|               | rs10746531 | Imputed   | 0.30778  |          |          |      |  | 25676601 |          |
|               |            |           |          | CUTL1    | TransFac | 2.23 |  | 25677188 | 25677203 |
|               |            |           |          | RSRFC4   | TransFac | 2.54 |  | 25678018 | 25678034 |
|               | rs17803553 | Imputed   | 0.536    |          |          |      |  | 25678607 |          |
|               | rs1454083  | Imputed   | 0.5387   |          |          |      |  | 25679889 |          |
|               | rs12622697 | Imputed   | 0.53945  |          |          |      |  | 25680772 |          |
|               | rs12613835 | Genotyped | 0.50757  |          |          |      |  | 25682705 |          |
|               | rs1377781  | Imputed   | 0.54166  |          |          |      |  | 25682951 |          |
|               | rs1377782  | Imputed   | 0.54135  |          |          |      |  | 25683014 |          |
|               |            |           |          | FOXI1    | TransFac | 1.96 |  | 25683199 | 25683212 |
|               |            |           |          | SREBP-1a | TransFac | 2.37 |  | 25683207 | 25683218 |
|               |            |           |          | POU2F1   | TransFac | 2.31 |  | 25683591 | 25683605 |
|               |            |           |          | Nkx3-1   | TransFac | 2.77 |  | 25683598 | 25683610 |
|               |            |           |          | POU2F1   | TransFac | 3.49 |  | 25683605 | 25683619 |
| DTNB_Exon_5   |            |           |          |          |          |      |  | 25683609 | 25683694 |
| DTNB_Intron_4 |            |           |          |          |          |      |  | 25683695 | 25704543 |
|               |            |           |          | POU3F2   | TransFac | 2.78 |  | 25684803 | 25684817 |
|               | rs17747147 | Imputed   | 0.52916  |          |          |      |  | 25685621 |          |
|               | rs67056533 | Imputed   | 0.52869  |          |          |      |  | 25685701 |          |
|               | rs72797663 | Imputed   | 0.52687  |          |          |      |  | 25686032 |          |
|               | rs6745864  | Imputed   | 0.053044 |          |          |      |  | 25688027 |          |
|               | rs11678268 | Genotyped | 0.44967  |          |          |      |  | 25690660 |          |
|               | rs12477988 | Imputed   | 0.032504 |          |          |      |  | 25691421 |          |
|               |            |           |          | ISGF-3   | TransFac | 3.02 |  | 25692508 | 25692523 |
|               |            |           |          | Cart-1   | TransFac | 1.98 |  | 25692911 | 25692929 |
|               |            |           |          | TBP      | TransFac | 2.88 |  | 25692987 | 25693002 |
|               | rs58541550 | Imputed   | 0.032337 |          |          |      |  | 25693055 |          |
|               | rs13409425 | Imputed   | 0.90959  |          |          |      |  | 25693327 |          |
|               | rs1377783  | Imputed   | 0.35365  |          |          |      |  | 25693415 |          |
|               | rs11126132 | Imputed   | 0.5943   |          |          |      |  | 25694220 |          |
|               |            |           |          | Bach1    | TransFac | 2.06 |  | 25695304 | 25695319 |
|               |            |           |          | AP-1     | TransFac | 2.01 |  | 25695305 | 25695318 |
|               |            |           |          | Cdc5     | TransFac | 2.09 |  | 25695335 | 25695347 |
|               |            |           |          | POU2F1   | TransFac | 1.96 |  | 25695502 | 25695514 |
|               |            |           |          | CUTL1    | TransFac | 2.13 |  | 25695768 | 25695780 |
|               | rs17047109 | Imputed   | 0.032647 |          |          |      |  | 25696112 |          |
|               | rs764956   | Imputed   | 0.022605 |          |          |      |  | 25696756 |          |
|               | rs11681084 | Imputed   | 0.35903  |          |          |      |  | 25697305 |          |
|               | rs72852637 | Imputed   | 0.032811 |          |          |      |  | 25697737 |          |
|               | rs6718225  | Imputed   | 0.032862 |          |          |      |  | 25698332 |          |

rs6546314 Genotyped 0.039315

25698971



**Supplementary Table 3: Relationship between rs4487645 (7p15.3), rs1052501 (3p22.1) and rs6746082 (2p23.3) genotypes and sex, age and MM phenotype.**

| Phenotype                 | SNP       | 1   |     |     |        |     |     | 2   |     |     |        |    |     | P-value | Q    |
|---------------------------|-----------|-----|-----|-----|--------|-----|-----|-----|-----|-----|--------|----|-----|---------|------|
|                           |           | UK  |     |     | German |     |     | UK  |     |     | German |    |     |         |      |
|                           |           | AA  | AB  | BB  | AA     | AB  | BB  | AA  | AB  | BB  | AA     | AB | BB  |         |      |
| Sex                       | rs4487645 | 262 | 223 | 45  | 88     | 54  | 6   | 407 | 324 | 58  | 118    | 72 | 16  | 0.67    | 1.47 |
| Male =1                   | rs1052501 | 24  | 160 | 346 | 5      | 51  | 92  | 30  | 261 | 499 | 5      | 67 | 134 | 0.92    | 0.61 |
| Female = 2                | rs6746082 | 352 | 162 | 16  | 102    | 39  | 7   | 537 | 229 | 24  | 145    | 58 | 3   | 0.40    | 0.26 |
| Age at diagnosis          | rs4487645 | 304 | 240 | 33  | 174    | 107 | 20  | 365 | 307 | 70  | 32     | 19 | 2   | 0.08    | 1.54 |
| <62 =1                    | rs1052501 | 23  | 197 | 358 | 10     | 95  | 196 | 31  | 224 | 487 | 0      | 23 | 30  | 0.41    | 0.97 |
| ≥62 = 2                   | rs6746082 | 390 | 173 | 15  | 210    | 82  | 9   | 499 | 218 | 25  | 37     | 15 | 1   | 0.79    | 0.06 |
| Hyperdiploidy=1           | rs4487645 | 213 | 160 | 28  | 109    | 58  | 9   | 152 | 141 | 27  | 97     | 68 | 13  | 0.04    | 0.15 |
| No hyperdiploidy=2        | rs1052501 | 19  | 137 | 246 | 7      | 61  | 108 | 13  | 91  | 216 | 3      | 57 | 118 | 0.04    | 0.02 |
|                           | rs6746082 | 271 | 117 | 14  | 125    | 47  | 4   | 222 | 90  | 8   | 122    | 50 | 6   | 0.81    | 0.89 |
| IGH translocation =1      | rs4487645 | 163 | 140 | 23  | 16     | 14  | 1   | 223 | 162 | 32  | 17     | 10 | 1   | 0.46    | 0.18 |
| No IGH translocation=2    | rs1052501 | 14  | 97  | 216 | 0      | 11  | 20  | 18  | 140 | 259 | 0      | 13 | 15  | 0.26    | 0.37 |
|                           | rs6746082 | 228 | 89  | 10  | 16     | 14  | 1   | 288 | 115 | 14  | 22     | 6  | 0   | 0.78    | 4.69 |
| T4-14 Translocation=1     | rs4487645 | 38  | 38  | 7   | 21     | 19  | 4   | 353 | 271 | 48  | 158    | 92 | 16  | 0.08    | 0.30 |
| No T4-14 Translocation=2  | rs1052501 | 3   | 28  | 52  | 2      | 13  | 29  | 29  | 211 | 433 | 8      | 90 | 168 | 0.96    | 0.04 |
|                           | rs6746082 | 53  | 28  | 2   | 32     | 9   | 3   | 471 | 181 | 21  | 187    | 72 | 7   | 0.41    | 0.11 |
| T11-14 Translocation=1    | rs4487645 | 52  | 48  | 8   | 42     | 29  | 4   | 338 | 260 | 47  | 160    | 93 | 17  | 0.48    | 0.03 |
| No T11-14 Translocation=2 | rs1052501 | 4   | 40  | 64  | 2      | 18  | 55  | 29  | 200 | 417 | 8      | 95 | 167 | 0.77    | 3.21 |
|                           | rs6746082 | 82  | 23  | 3   | 51     | 23  | 1   | 441 | 185 | 20  | 192    | 69 | 9   | 0.33    | 1.12 |

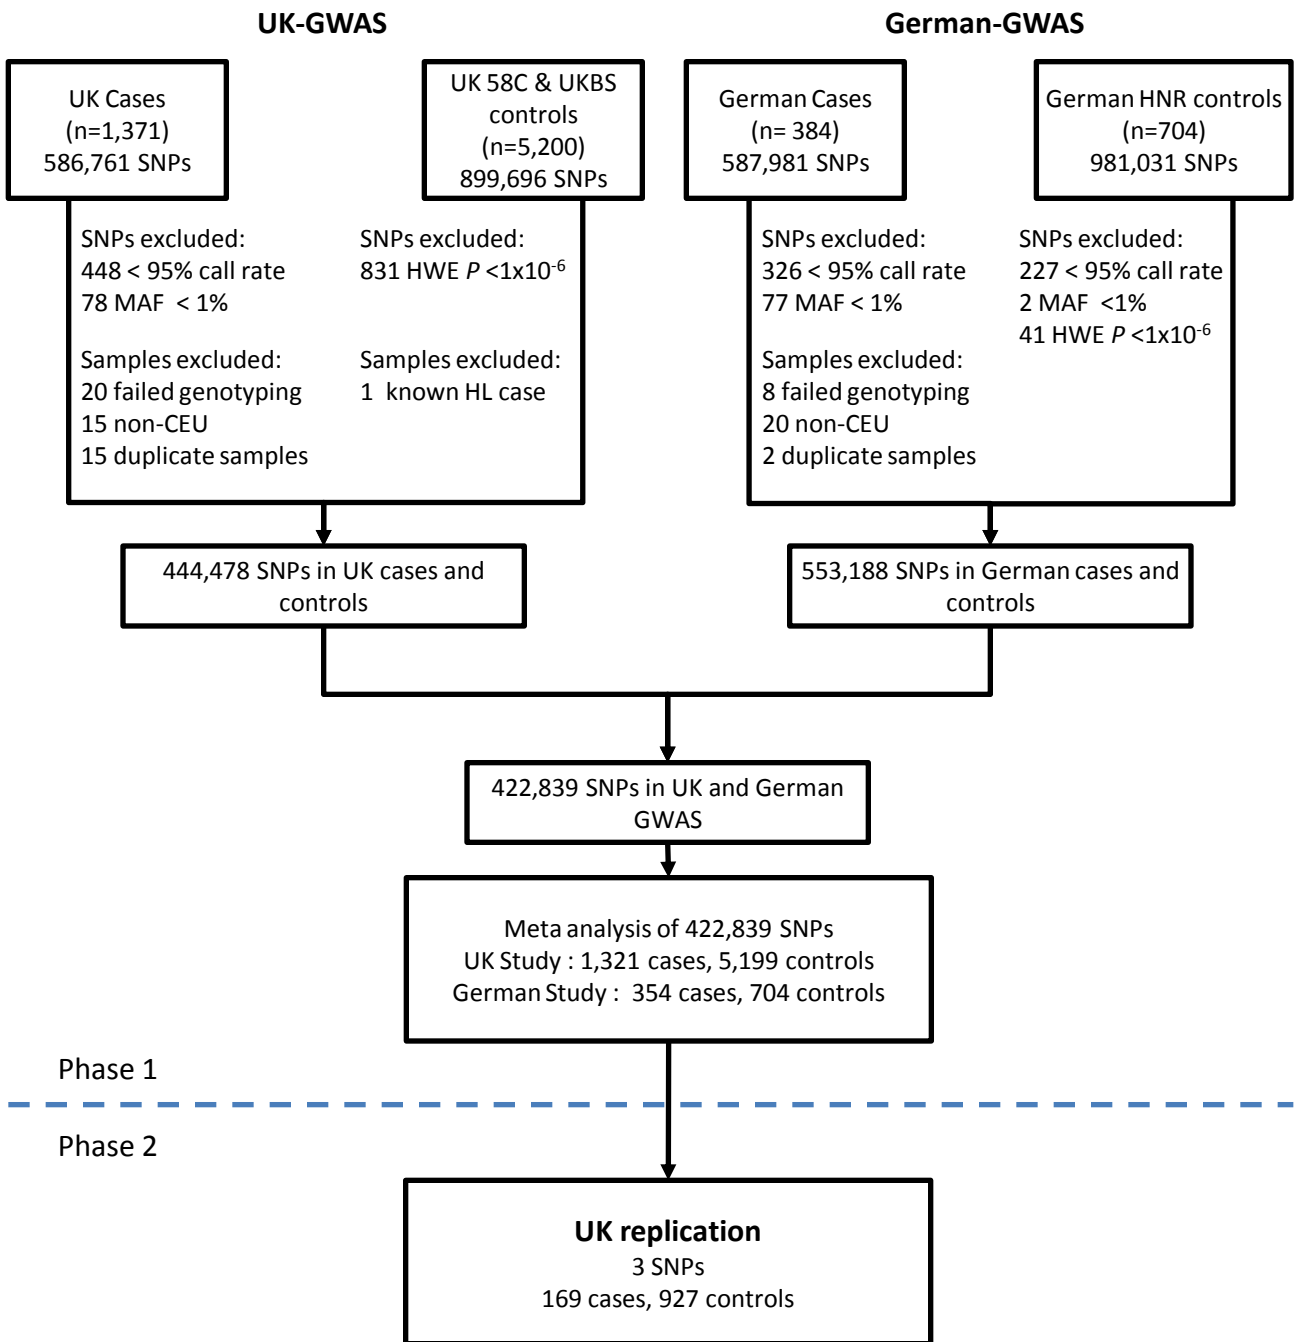

**Supplementary Figure 1: GWAS data quality control.** Details are provided of samples and SNPs used in UK-GWAS and German-GWAS and UK replication series.

**Supplementary Figure 2: Identification of individuals in the GWAS of non-European ancestry in cases and controls.** The first two principal components of the analysis were plotted for the UK-GWAS (a) and German-GWAS (b). HapMap CEU individuals are plotted in blue; CHB+JPT individuals are plotted in green; YRI individuals are plotted in red; GWAS cases are plotted in black and controls are plotted in purple. Cases that were removed are shown as triangles.

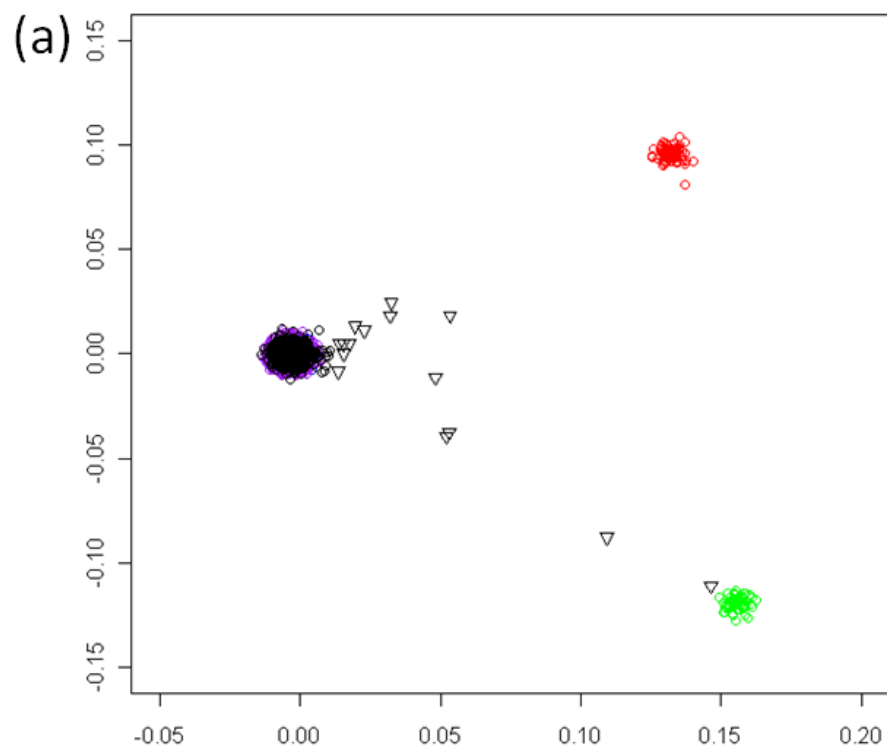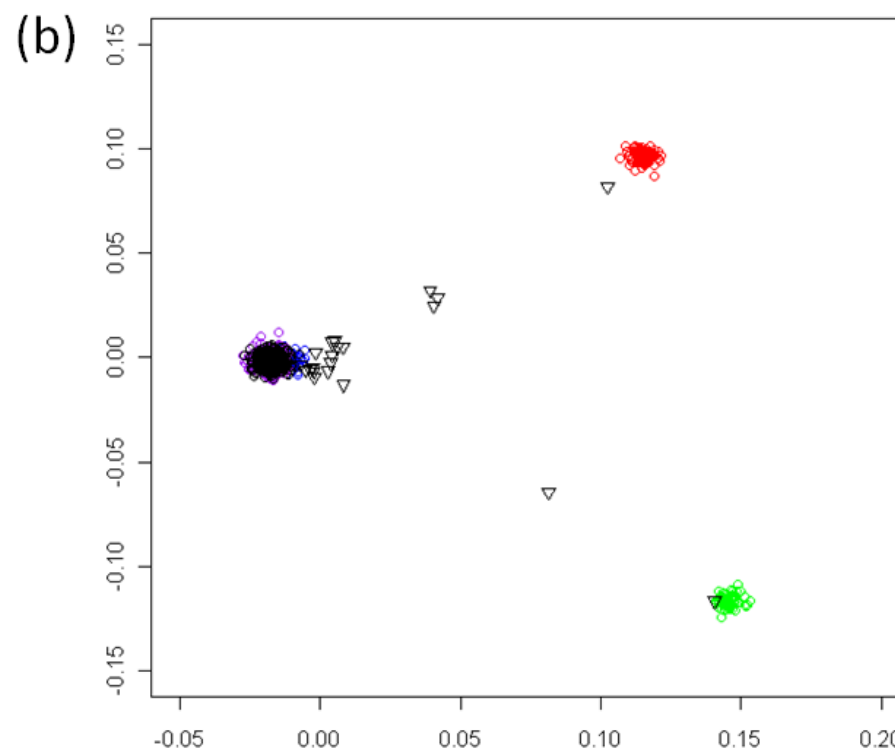

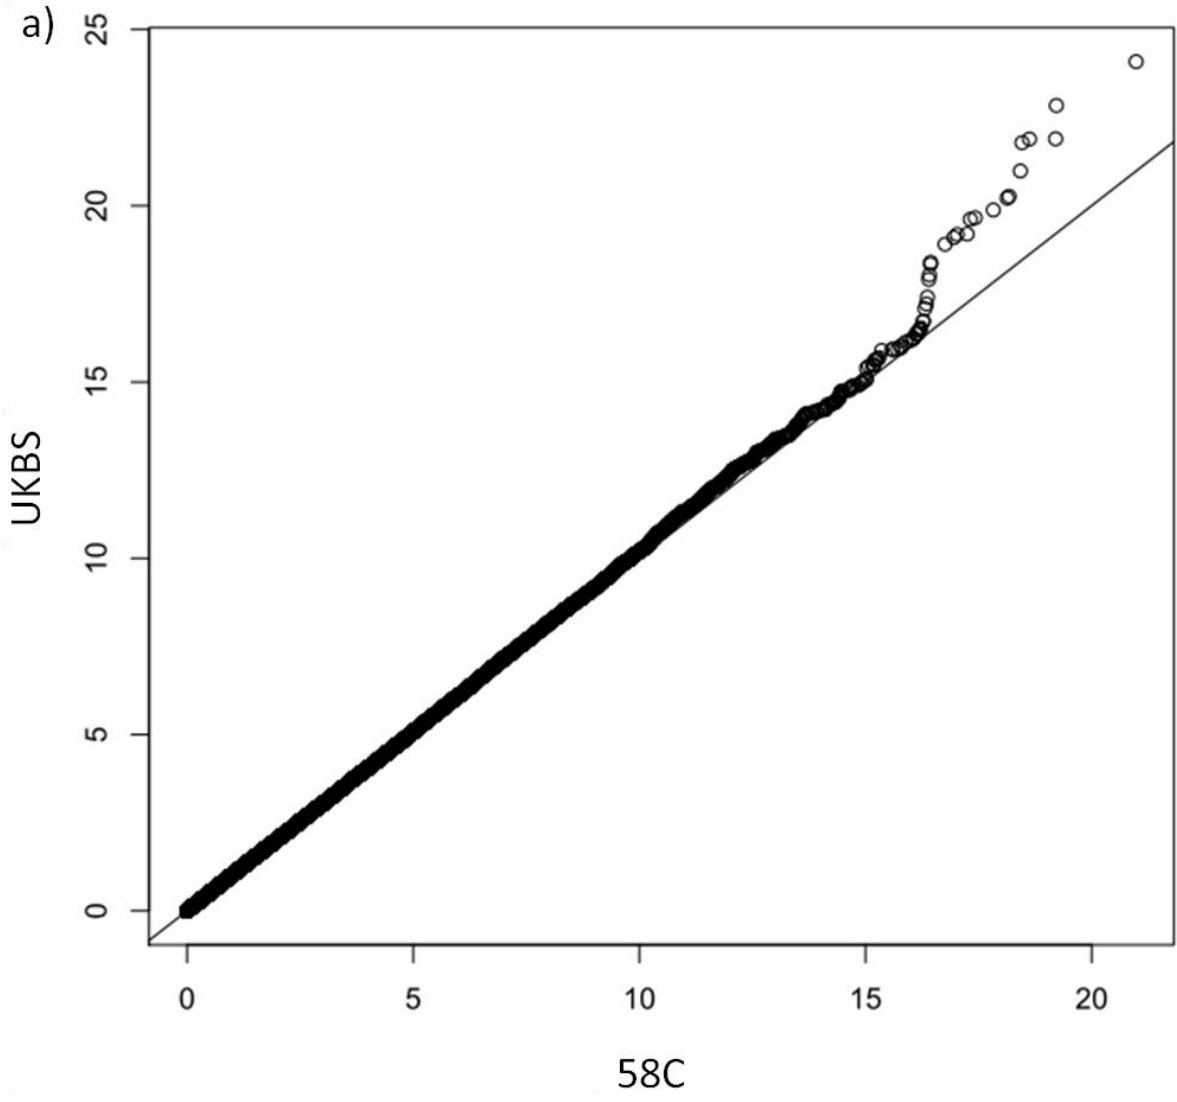

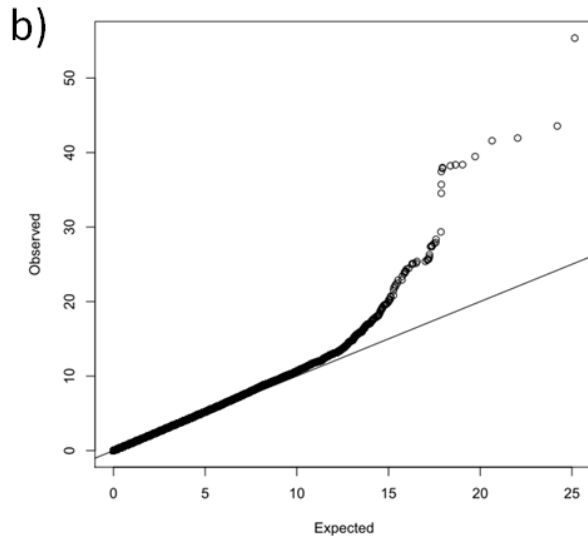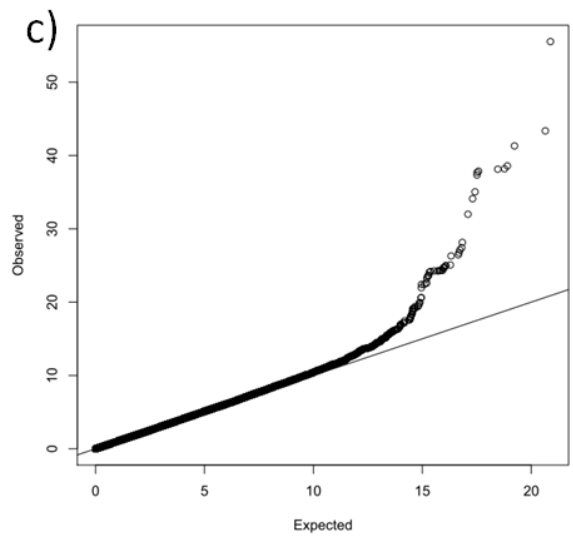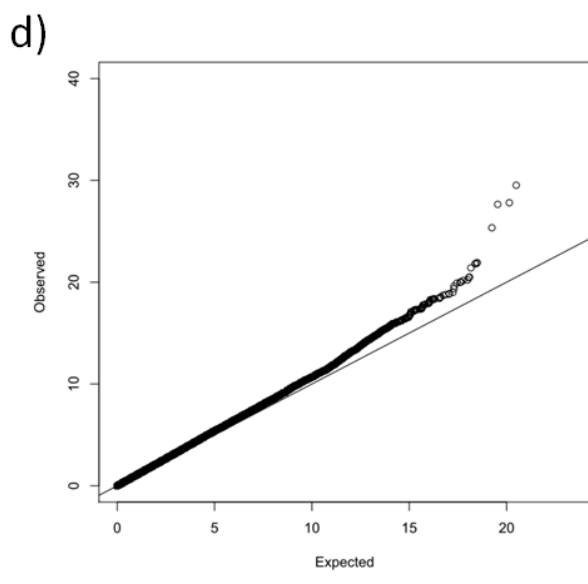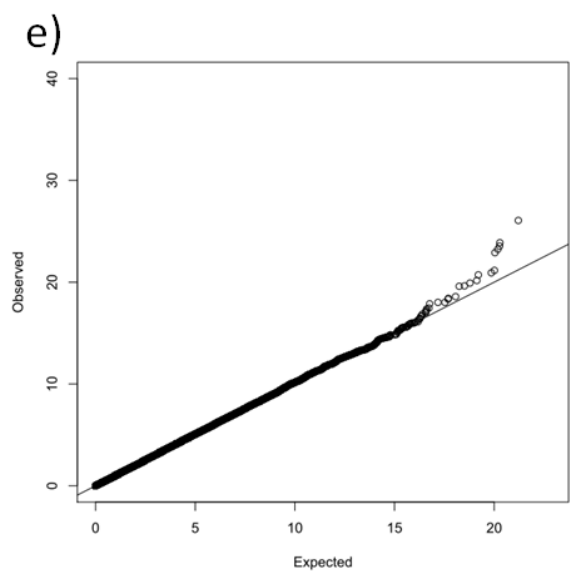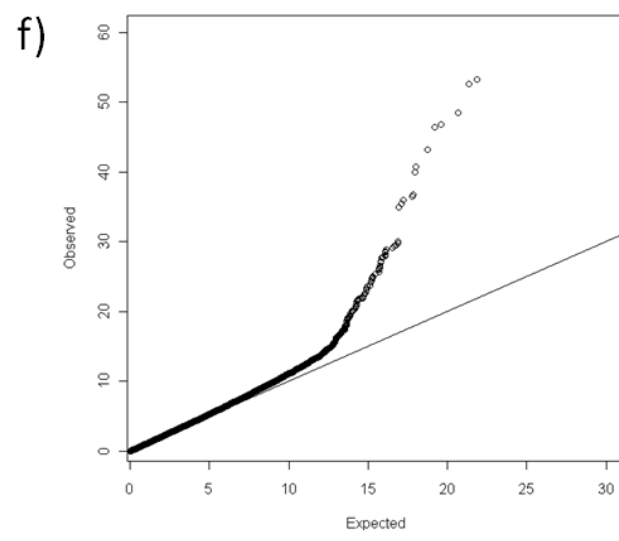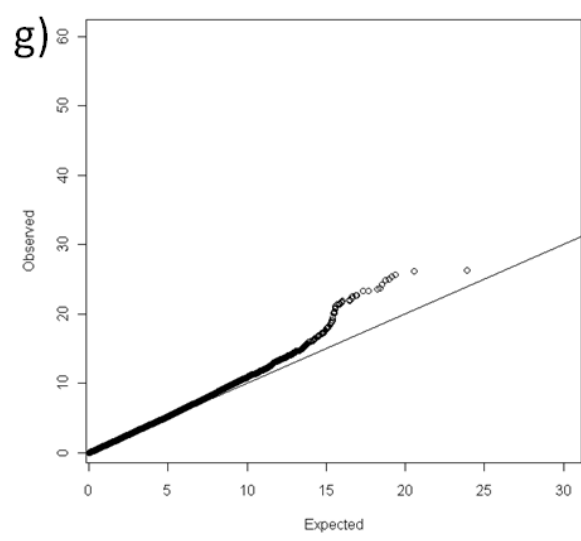

**Supplementary Figure 3:** Q-Q plots of chi-square values for association between (a) 58C and UKBS controls ( $\lambda=1.019$ ). Observed and expected chi-square values for association between (b) UK-GWAS ( $\lambda=1.033$ ); (c) UK-GWAS corrected for population stratification (using the first ten principle components calculated using EIGENSTRAT) ( $\lambda=1.01$ ); (d) German GWAS ( $\lambda=1.059$ ); (e) German-GWAS, EIGENSTRAT corrected ( $\lambda=1.005$ ); (f) meta-analysis ( $\lambda=1.048$ ); (g) meta-analysis after exclusion of SNPs mapping to regions of LD at the 2p23.3, 3p22.1 and 7p15.3 associations ( $\lambda=1.047$ ). The black line represents the null hypothesis of no true association.

**Supplementary Figure 4: Relationship between rs6746082 (2p23.3) and *DTNB* expression, rs1052501 (3p22.1) and *ULK4* expression, and between rs4487645 (7p15.3) genotype and *CDCA7L*, *DNAH11* expression in plasma cells and lymphoblastoid cell lines.** Differences in the distribution of expression by SNP genotype were compared using a Wilcoxon-type test for trend<sup>40</sup>. Box plots shown only for associations at  $P < 0.05$ . NA= not available.

| Variant                   | Gene          | Plasma cell expression<br><i>P</i> -value | LCL expression<br><i>P</i> -value |
|---------------------------|---------------|-------------------------------------------|-----------------------------------|
| <b>rs4487645 (7p15.3)</b> | <i>DNAH11</i> | 0.376                                     | 0.382                             |
|                           | <i>CDCA7L</i> | 0.091                                     | N/A                               |
| <b>rs1052501 (3p22.1)</b> | <i>ULK4</i>   | <b>0.019</b>                              | N/A                               |
|                           | <i>TRAK1</i>  | 0.160                                     | N/A                               |
| <b>rs6746082 (2p23.3)</b> | <i>DTNB</i>   | 0.822                                     | <b>0.001</b>                      |

**rs1052501 (3p22.1) and *ULK4***

**Plasma cell expression**

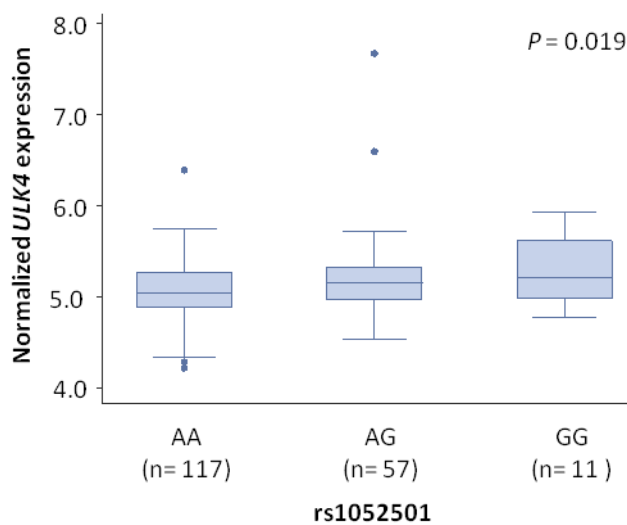

## rs6746082 (2p23.3) and *DTNB*

### Plasma cell expression

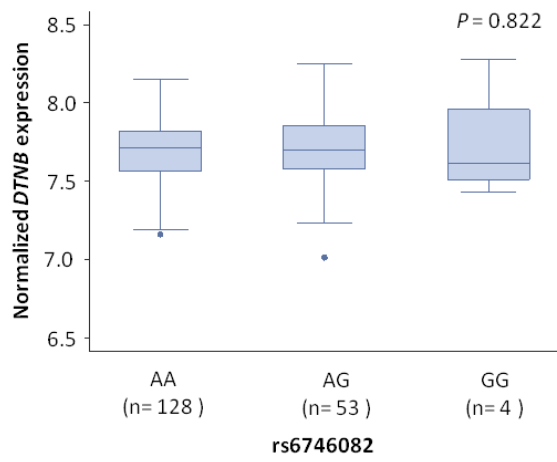

### LCL expression

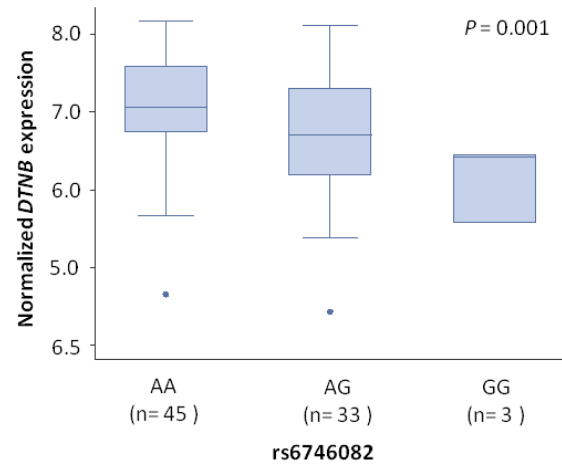

Supplement: NIHMS37098-supplement-1.pdf [file NIHMS37098-supplement-1.pdf]
